# Supplementary material for: Sex-related chemical differences in keratin from fingernail plates: a solid-state carbon-13 NMR study
Source: Royal Society of Chemistry journal article supplement (doi:10.1039/c7ra03487c), 2017-01-01
Supplement: c7ra03487c1.xlsx [file c7ra03487c1.xlsx]

## Sheet: S1_Dataset
Chemical shift [ppm]	F1	F2	F3	F4	F5	F6	F7	F8	F9	F10	F11	F12	F13	F14	F15	F16	F17	F18	F19	F20	F21	F22	F23	F24	F25	F26	F27	F28	F29	F30	F31	F32	F33	F34	F35	F36	F37	F38	M1	M2	M3	M4	M5	M6	M7	M8	M9	M10	M11
251.99089050	-1204986.37500000	48700.58984375	-1026110.37500000	-4797818.00000000	2840271.75000000	-1277053.75000000	-3112354.00000000	-2028622.12500000	2428168.75000000	6315224.50000000	-112828.35156250	-732130.81250000	5245476.00000000	1097390.75000000	118534.25000000	1308125.12500000	1563258.75000000	865123.12500000	-2392711.25000000	2193583.75000000	-1297789.00000000	2506188.75000000	-873734.12500000	670217.62500000	-2658965.25000000	-2083418.50000000	3256162.25000000	-283873.71875000	-2196416.25000000	-511028.93750000	-904810.06250000	-989751.43750000	-1590771.75000000	-5674743.00000000	2851403.00000000	-487887.78125000	-902199.37500000	3033148.00000000	475254.75000000	-5689662.00000000	2533667.00000000	3442612.50000000	583047.18750000	2823182.25000000	5005791.00000000	-3587090.25000000	1436254.00000000	831560.12500000	3274870.00000000
251.95906067	-1201498.00000000	17371.87500000	-770280.43750000	-5126019.00000000	2603629.75000000	-1501065.50000000	-2853784.25000000	-1991470.00000000	2529230.00000000	6365446.50000000	-263959.00000000	-485198.53125000	5270017.00000000	849454.00000000	-268707.84375000	1208123.75000000	1949801.00000000	931730.56250000	-2430249.75000000	2152982.75000000	-1691206.50000000	2631946.50000000	-1301610.87500000	977140.25000000	-2468587.25000000	-2520840.75000000	2905023.00000000	-181038.42187500	-1934094.37500000	-643637.43750000	-497080.71875000	-1159443.25000000	-1428017.12500000	-5637119.50000000	2877420.75000000	-513831.31250000	-685295.81250000	3060098.75000000	961787.75000000	-5064128.00000000	2548628.25000000	3608563.75000000	562865.87500000	2464591.50000000	4922954.50000000	-3824878.00000000	1336637.62500000	658424.81250000	2995111.25000000
251.92721558	-1199538.87500000	-26709.68750000	-567256.62500000	-5409848.50000000	2316565.75000000	-1627135.37500000	-2612962.25000000	-1896171.25000000	2584573.50000000	6452977.50000000	-406113.68750000	-344601.28125000	5403505.50000000	583341.75000000	-744025.37500000	1104295.75000000	2252117.00000000	1100109.00000000	-2467654.75000000	2218038.00000000	-2072285.00000000	2822145.00000000	-1730182.00000000	1288175.12500000	-2249709.75000000	-3027190.50000000	2547918.50000000	53947.89453125	-1683967.75000000	-858579.43750000	-278717.46875000	-1360201.00000000	-1234336.00000000	-5464160.50000000	2950834.50000000	-594170.06250000	-499996.09375000	3119900.50000000	1374408.00000000	-4344544.50000000	2711534.50000000	3805085.00000000	631932.68750000	2204426.00000000	4865941.50000000	-4047981.50000000	1342430.87500000	508486.09375000	2729369.75000000
251.89537048	-1253193.37500000	-105349.00781250	-464093.65625000	-5671110.00000000	2078451.00000000	-1638574.12500000	-2418691.50000000	-1702175.25000000	2636801.25000000	6556650.00000000	-480501.81250000	-343684.21875000	5586487.50000000	354893.25000000	-1187310.87500000	1050686.62500000	2386773.75000000	1407316.87500000	-2535975.75000000	2401678.25000000	-2438568.00000000	3039510.25000000	-2042594.62500000	1579576.12500000	-2070984.87500000	-3468865.50000000	2262347.25000000	411506.06250000	-1467682.87500000	-1151594.87500000	-237803.21875000	-1469518.12500000	-1016216.56250000	-5151132.50000000	3016222.50000000	-753844.50000000	-409567.06250000	3199781.50000000	1676467.87500000	-3611492.25000000	2994125.00000000	4027452.25000000	828887.37500000	2070662.87500000	4819848.00000000	-4206228.50000000	1358073.00000000	377383.34375000	2517405.75000000
251.86352539	-1354852.75000000	-227529.53125000	-483808.21875000	-5905476.50000000	1951680.75000000	-1566308.25000000	-2253767.25000000	-1398855.00000000	2734081.75000000	6667483.00000000	-423580.15625000	-455342.40625000	5777519.50000000	236599.37500000	-1493778.25000000	1116163.75000000	2320215.00000000	1835072.12500000	-2650184.25000000	2675368.00000000	-2815358.50000000	3265925.50000000	-2138203.75000000	1818068.87500000	-1975603.75000000	-3742906.75000000	2092010.62500000	836022.06250000	-1297348.75000000	-1521860.87500000	-323047.21875000	-1432703.87500000	-760771.56250000	-4713633.50000000	3047095.25000000	-1004720.25000000	-446440.34375000	3262067.75000000	1857830.12500000	-2931880.00000000	3309063.25000000	4262716.00000000	1142950.62500000	2062084.87500000	4752419.50000000	-4253092.50000000	1303026.25000000	262323.06250000	2368884.75000000
251.83169556	-1462755.37500000	-373972.96875000	-630138.43750000	-6079878.50000000	1955321.12500000	-1472788.75000000	-2088515.12500000	-1019624.56250000	2889406.75000000	6781323.50000000	-208251.17187500	-611650.68750000	5954533.00000000	279694.03125000	-1616303.62500000	1336535.00000000	2083415.25000000	2288852.00000000	-2785108.75000000	2981369.00000000	-3222610.50000000	3498413.75000000	-1964696.62500000	1981619.75000000	-1944252.50000000	-3810439.75000000	2034386.75000000	1261062.00000000	-1188048.50000000	-1944480.25000000	-484215.81250000	-1298926.00000000	-458624.18750000	-4195313.50000000	3067272.75000000	-1306614.50000000	-571156.37500000	3281004.50000000	1929098.75000000	-2351861.50000000	3552478.50000000	4500032.00000000	1516860.62500000	2142705.50000000	4657370.50000000	-4167553.25000000	1184108.50000000	181375.95312500	2268720.25000000
251.79983521	-1550712.37500000	-514434.81250000	-888027.43750000	-6164412.50000000	2075014.12500000	-1408870.37500000	-1920544.25000000	-632535.37500000	3072154.75000000	6896650.50000000	124226.08593750	-757427.75000000	6092896.00000000	484591.18750000	-1576233.87500000	1677905.00000000	1749075.75000000	2645786.75000000	-2903295.50000000	3238879.75000000	-3644102.00000000	3731109.25000000	-1530793.00000000	2064892.37500000	-1921501.37500000	-3697136.25000000	2042659.87500000	1646195.25000000	-1166076.37500000	-2357677.75000000	-687492.68750000	-1176289.75000000	-129488.50000000	-3655466.75000000	3129414.75000000	-1552465.87500000	-694659.43750000	3267523.75000000	1902077.37500000	-1898290.75000000	3656160.25000000	4730842.00000000	1881479.12500000	2258488.00000000	4562201.00000000	-3963627.75000000	1099762.75000000	169927.57812500	2195254.00000000
251.76800537	-1627078.87500000	-642084.31250000	-1214188.87500000	-6163775.50000000	2269123.00000000	-1380494.87500000	-1779567.00000000	-311562.96875000	3228308.50000000	7013592.50000000	480075.71875000	-884466.87500000	6163669.00000000	811943.00000000	-1440698.75000000	2043707.87500000	1394602.25000000	2828992.50000000	-3006018.75000000	3369752.25000000	-4022495.00000000	3946615.75000000	-905623.43750000	2070287.62500000	-1869491.25000000	-3465822.00000000	2046631.25000000	1984512.87500000	-1254724.87500000	-2687445.25000000	-902185.43750000	-1145771.87500000	185084.46875000	-3143833.25000000	3269312.50000000	-1621146.75000000	-746286.56250000	3257957.00000000	1775921.87500000	-1584671.00000000	3610156.75000000	4935880.00000000	2189747.75000000	2366909.00000000	4503516.00000000	-3681086.00000000	1166606.00000000	254615.34375000	2136844.25000000
251.73617554	-1714371.75000000	-785787.31250000	-1533839.50000000	-6108123.50000000	2475026.00000000	-1357671.12500000	-1693094.00000000	-103111.78125000	3301320.00000000	7128365.00000000	772999.87500000	-1022619.75000000	6161305.50000000	1218602.37500000	-1280994.62500000	2325228.25000000	1076805.12500000	2837737.00000000	-3143021.25000000	3344202.25000000	-4284458.50000000	4124895.50000000	-201127.25000000	2000316.50000000	-1793981.75000000	-3186401.00000000	1987914.25000000	2279363.00000000	-1447602.37500000	-2892877.25000000	-1088361.87500000	-1210614.12500000	454321.34375000	-2689364.50000000	3475734.50000000	-1460083.12500000	-720918.37500000	3283628.25000000	1539590.25000000	-1413065.12500000	3445935.00000000	5082771.00000000	2426160.75000000	2456280.00000000	4501985.00000000	-3369260.00000000	1424019.37500000	430124.43750000	2095768.37500000
251.70433044	-1824159.25000000	-983942.43750000	-1760853.87500000	-6008471.00000000	2630251.50000000	-1316528.75000000	-1653217.12500000	-9273.17968750	3239433.50000000	7232435.50000000	977779.12500000	-1206348.25000000	6125898.50000000	1671700.62500000	-1133613.62500000	2461667.00000000	822652.25000000	2716260.50000000	-3359094.50000000	3204399.00000000	-4375040.50000000	4258465.50000000	465215.62500000	1862161.37500000	-1725051.62500000	-2919925.00000000	1852506.87500000	2519282.25000000	-1700488.37500000	-2991551.50000000	-1207308.62500000	-1312527.37500000	676266.00000000	-2312773.25000000	3696359.00000000	-1114523.62500000	-663762.56250000	3355122.25000000	1180585.12500000	-1367739.12500000	3203806.75000000	5150623.50000000	2598079.50000000	2541921.25000000	4555328.50000000	-3076592.75000000	1800372.62500000	663110.93750000	2076728.87500000
251.67248535	-1955696.12500000	-1247253.00000000	-1836009.12500000	-5827014.50000000	2701844.75000000	-1269700.00000000	-1623821.37500000	-371.01315308	3001530.50000000	7326690.00000000	1132094.25000000	-1446478.50000000	6123312.50000000	2126761.25000000	-987350.25000000	2467868.50000000	628085.06250000	2509734.50000000	-3632494.25000000	3033730.75000000	-4276217.00000000	4360792.50000000	1010293.12500000	1675721.37500000	-1680715.50000000	-2710156.25000000	1681651.50000000	2678167.75000000	-1954765.62500000	-3042657.75000000	-1242871.62500000	-1376435.87500000	859450.43750000	-2043644.25000000	3867437.25000000	-678239.75000000	-620780.37500000	3472746.75000000	688259.75000000	-1409349.12500000	2913681.25000000	5157754.00000000	2726312.50000000	2645210.50000000	4642545.00000000	-2845908.25000000	2172026.50000000	917282.37500000	2071504.00000000
251.64064026	-2110167.75000000	-1547043.37500000	-1756469.25000000	-5504039.00000000	2694862.25000000	-1254936.62500000	-1580972.62500000	-44977.99609375	2574218.25000000	7438455.50000000	1293443.00000000	-1720873.25000000	6193086.50000000	2510763.75000000	-807805.68750000	2413102.75000000	466232.84375000	2253131.25000000	-3877316.25000000	2898153.75000000	-4005047.25000000	4464897.00000000	1401256.62500000	1467988.87500000	-1648988.37500000	-2573315.75000000	1551140.50000000	2737484.50000000	-2169013.50000000	-3104882.00000000	-1207841.12500000	-1334060.12500000	989372.50000000	-1921126.12500000	3942360.25000000	-227533.12500000	-611088.00000000	3641758.00000000	60089.92968750	-1484271.75000000	2597055.50000000	5153121.00000000	2839378.50000000	2773141.25000000	4732971.00000000	-2706944.50000000	2452880.25000000	1170068.62500000	2055568.62500000
251.60881042	-2294143.00000000	-1833421.62500000	-1572780.62500000	-5022512.00000000	2627640.50000000	-1299796.00000000	-1541853.00000000	-129091.10156250	1991045.37500000	7612265.00000000	1495820.62500000	-1984028.25000000	6311170.00000000	2749828.75000000	-581525.37500000	2369058.25000000	308998.46875000	1983413.87500000	-4013617.75000000	2819765.75000000	-3606995.00000000	4615800.00000000	1642239.62500000	1254560.50000000	-1599437.50000000	-2493543.50000000	1527463.25000000	2703835.50000000	-2328202.75000000	-3205958.75000000	-1129649.00000000	-1126241.25000000	1018942.93750000	-1979681.87500000	3905521.50000000	194588.64062500	-638034.00000000	3866940.50000000	-676464.56250000	-1550529.50000000	2277564.00000000	5168333.50000000	2963202.25000000	2910138.25000000	4803561.00000000	-2666915.25000000	2626354.50000000	1405966.62500000	2003824.50000000
251.57698059	-2504178.00000000	-2057346.50000000	-1355317.87500000	-4446244.50000000	2500801.00000000	-1401835.62500000	-1552762.25000000	-249267.46875000	1330662.37500000	7868347.50000000	1736037.12500000	-2189397.00000000	6403944.00000000	2821327.50000000	-339342.21875000	2365068.00000000	149221.29687500	1736807.50000000	-4033451.00000000	2802764.00000000	-3154272.75000000	4858478.00000000	1754868.12500000	1032064.00000000	-1508944.37500000	-2438036.25000000	1624919.75000000	2604182.75000000	-2429389.25000000	-3343240.75000000	-1033193.75000000	-718159.37500000	896801.43750000	-2235661.00000000	3772401.75000000	551509.50000000	-705766.00000000	4129561.75000000	-1440185.87500000	-1601475.62500000	1983954.25000000	5179523.50000000	3105493.75000000	3022155.25000000	4860538.50000000	-2710607.00000000	2703901.25000000	1601610.37500000	1914128.62500000
251.54512024	-2709756.25000000	-2178764.50000000	-1156841.25000000	-3892357.25000000	2297143.75000000	-1537611.75000000	-1652560.75000000	-394776.68750000	684487.93750000	8165208.00000000	1982265.50000000	-2312093.25000000	6401436.50000000	2768581.25000000	-135312.73437500	2379138.50000000	541.47766113	1524051.62500000	-3996483.25000000	2867357.00000000	-2737114.75000000	5222109.00000000	1772990.87500000	796736.18750000	-1380200.37500000	-2384053.75000000	1791886.87500000	2467067.75000000	-2470544.50000000	-3502671.50000000	-934996.25000000	-133794.14062500	609841.75000000	-2679566.75000000	3578809.00000000	800326.25000000	-813219.06250000	4375953.00000000	-2106503.00000000	-1665224.87500000	1738885.37500000	5125947.50000000	3247053.50000000	3066794.50000000	4942970.50000000	-2815161.75000000	2682066.50000000	1726351.25000000	1818322.12500000
251.51329041	-2854322.00000000	-2170540.75000000	-997298.18750000	-3465604.00000000	2012449.50000000	-1677778.12500000	-1848903.00000000	-544164.75000000	112494.17187500	8409345.00000000	2184729.50000000	-2354786.75000000	6283081.00000000	2653609.00000000	-3898.67822266	2364766.00000000	-125885.40625000	1315828.37500000	-3967019.50000000	3041620.00000000	-2433942.00000000	5706204.00000000	1745663.25000000	571167.81250000	-1241425.00000000	-2330897.50000000	1939058.12500000	2310602.75000000	-2457380.25000000	-3671265.00000000	-843153.56250000	529768.87500000	204711.95312500	-3269190.50000000	3363406.75000000	915320.25000000	-939470.81250000	4538260.50000000	-2563141.75000000	-1778824.62500000	1542701.37500000	4972667.50000000	3350822.50000000	3006154.50000000	5093970.50000000	-2965583.25000000	2558540.75000000	1760745.12500000	1770105.25000000
251.48144531	-2876182.75000000	-2032325.25000000	-874413.68750000	-3214432.00000000	1679233.50000000	-1788074.75000000	-2121285.75000000	-680673.62500000	-380814.50000000	8509761.00000000	2284168.50000000	-2333827.00000000	6079904.50000000	2498029.50000000	57436.23046875	2286033.00000000	-240586.56250000	1063315.50000000	-3962074.75000000	3320794.75000000	-2274405.50000000	6276306.50000000	1726854.37500000	405039.28125000	-1132583.25000000	-2287595.75000000	1992391.25000000	2143975.00000000	-2413217.75000000	-3833117.50000000	-752980.00000000	1140965.37500000	-227843.00000000	-3928598.25000000	3151797.25000000	911831.06250000	-1050811.50000000	4571431.00000000	-2772821.75000000	-1959889.37500000	1370483.62500000	4751809.00000000	3383800.50000000	2822720.25000000	5320521.50000000	-3152076.25000000	2378332.50000000	1713273.75000000	1815950.00000000
251.44961548	-2737340.00000000	-1804267.50000000	-781398.00000000	-3134841.25000000	1354742.25000000	-1828696.12500000	-2434500.75000000	-805318.37500000	-831310.87500000	8428036.00000000	2224539.25000000	-2263388.75000000	5840278.00000000	2278059.25000000	64223.00390625	2133495.00000000	-369340.15625000	737718.50000000	-3955694.75000000	3648595.50000000	-2230629.25000000	6871868.50000000	1749618.75000000	344427.87500000	-1093493.87500000	-2257611.75000000	1930918.37500000	1970779.50000000	-2371473.25000000	-3958804.25000000	-644758.62500000	1602931.12500000	-594501.37500000	-4568840.50000000	2953549.00000000	834369.93750000	-1127679.12500000	4469874.50000000	-2788059.25000000	-2199813.50000000	1192422.87500000	4539055.00000000	3334048.00000000	2535944.50000000	5580028.50000000	-3350463.25000000	2232778.00000000	1619446.62500000	1962677.00000000
251.41775513	-2446795.00000000	-1557598.87500000	-715084.93750000	-3195107.00000000	1087641.50000000	-1772171.62500000	-2745014.25000000	-930045.93750000	-1272182.25000000	8182472.50000000	1967782.25000000	-2156018.50000000	5597361.50000000	1975405.50000000	14728.46777344	1918193.87500000	-532728.31250000	354864.37500000	-3917127.00000000	3947279.50000000	-2251734.75000000	7420898.50000000	1807592.37500000	404126.12500000	-1164151.62500000	-2241728.00000000	1779045.50000000	1783459.75000000	-2354806.00000000	-4002846.75000000	-499346.50000000	1896802.62500000	-840815.68750000	-5128137.50000000	2774377.50000000	721986.75000000	-1178641.62500000	4249032.50000000	-2706973.50000000	-2480512.75000000	1003433.18750000	4394715.00000000	3210003.00000000	2209467.50000000	5804555.50000000	-3512505.00000000	2193497.75000000	1526598.37500000	2155557.75000000
251.38592529	-2067495.75000000	-1359378.62500000	-676058.12500000	-3347022.00000000	899132.50000000	-1627757.75000000	-3003811.00000000	-1057655.12500000	-1696874.50000000	7815933.50000000	1501973.37500000	-2031954.62500000	5366933.50000000	1621914.25000000	-104860.94531250	1663193.87500000	-737049.00000000	-29129.30468750	-3832200.25000000	4163140.50000000	-2310377.75000000	7855156.50000000	1865117.50000000	576831.37500000	-1388101.00000000	-2245697.25000000	1565894.25000000	1557910.12500000	-2363899.50000000	-3915938.50000000	-328426.65625000	2071426.12500000	-969431.25000000	-5597941.50000000	2630645.50000000	588712.75000000	-1222554.25000000	3918035.25000000	-2611661.00000000	-2794150.00000000	831953.18750000	4334943.50000000	3025138.00000000	1938560.00000000	5935069.00000000	-3585736.00000000	2251515.50000000	1476247.50000000	2280953.75000000
251.35409546	-1698921.62500000	-1239557.75000000	-672477.06250000	-3527118.00000000	790594.06250000	-1436667.12500000	-3168182.50000000	-1170724.50000000	-2058909.00000000	7367261.00000000	843010.00000000	-1913906.87500000	5167718.00000000	1289097.62500000	-286780.25000000	1403994.00000000	-980373.06250000	-340961.03125000	-3694080.25000000	4279522.50000000	-2413899.50000000	8123402.00000000	1889064.62500000	862541.62500000	-1799385.87500000	-2266859.50000000	1296743.75000000	1266019.75000000	-2384815.75000000	-3670675.25000000	-190497.23437500	2200875.00000000	-1026860.06250000	-6004286.00000000	2549232.00000000	430795.37500000	-1259952.12500000	3479200.50000000	-2537269.50000000	-3145154.00000000	714280.50000000	4355923.50000000	2784246.00000000	1817248.12500000	5937333.50000000	-3549724.00000000	2329824.50000000	1490544.75000000	2205215.25000000
251.32223511	-1437054.87500000	-1187632.62500000	-727351.87500000	-3673653.00000000	757943.87500000	-1229208.87500000	-3220389.75000000	-1239862.25000000	-2309388.25000000	6870298.50000000	38353.44140625	-1804058.37500000	5033047.00000000	1042004.18750000	-486451.93750000	1185015.12500000	-1255902.62500000	-520243.93750000	-3492953.50000000	4294730.50000000	-2570149.50000000	8202203.50000000	1876742.87500000	1273622.00000000	-2388768.25000000	-2268009.50000000	967795.62500000	906638.18750000	-2400070.25000000	-3291568.25000000	-167428.10937500	2344889.00000000	-1068306.25000000	-6359192.50000000	2549134.00000000	241656.17187500	-1266667.50000000	2954806.50000000	-2478566.25000000	-3532689.25000000	659539.56250000	4466811.50000000	2486283.75000000	1899586.37500000	5805163.50000000	-3432233.00000000	2352828.75000000	1565180.00000000	1842255.00000000
251.29040527	-1331666.75000000	-1175025.25000000	-875191.25000000	-3758627.75000000	794616.75000000	-986416.25000000	-3175843.00000000	-1243229.50000000	-2439543.75000000	6370298.50000000	-828576.12500000	-1673099.37500000	4995188.50000000	910531.56250000	-652262.68750000	1037626.87500000	-1546638.50000000	-547962.50000000	-3228141.25000000	4202263.50000000	-2746903.75000000	8101603.00000000	1861381.25000000	1801450.62500000	-3076179.00000000	-2181571.00000000	605170.12500000	528118.31250000	-2390126.75000000	-2868964.00000000	-313663.90625000	2525048.00000000	-1122858.00000000	-6633111.50000000	2618340.75000000	18863.39257813	-1215338.62500000	2404420.50000000	-2409322.25000000	-3931776.00000000	645895.06250000	4683107.00000000	2142302.75000000	2174714.75000000	5569987.00000000	-3286081.75000000	2296304.00000000	1672108.62500000	1210650.12500000
251.25856018	-1371036.25000000	-1175280.37500000	-1142391.12500000	-3800304.25000000	888192.00000000	-653842.50000000	-3069516.50000000	-1183521.87500000	-2490439.75000000	5935029.00000000	-1649441.25000000	-1486266.50000000	5057069.50000000	894977.81250000	-770561.75000000	954961.75000000	-1825626.12500000	-457601.34375000	-2924473.25000000	3996914.75000000	-2870378.50000000	7861332.00000000	1896569.87500000	2384638.00000000	-3725236.50000000	-1960468.62500000	279775.40625000	212987.59375000	-2333546.50000000	-2532884.75000000	-621010.18750000	2716469.50000000	-1180598.37500000	-6776809.00000000	2706164.75000000	-235416.87500000	-1100908.37500000	1904929.62500000	-2298155.50000000	-4293712.50000000	656003.50000000	4991800.50000000	1791193.00000000	2567150.25000000	5309074.50000000	-3149288.75000000	2176861.50000000	1773582.25000000	432749.40625000
251.22673035	-1505965.00000000	-1164567.25000000	-1527418.37500000	-3834385.00000000	1024121.00000000	-197727.75000000	-2930853.00000000	-1094217.75000000	-2522767.75000000	5647975.00000000	-2325736.50000000	-1247332.62500000	5178709.50000000	977618.06250000	-876412.25000000	898665.12500000	-2068684.62500000	-312491.15625000	-2620831.50000000	3689526.00000000	-2867250.75000000	7536726.50000000	2030107.87500000	2924622.50000000	-4203298.50000000	-1627837.12500000	76214.88281250	27731.34375000	-2220390.75000000	-2387912.25000000	-1029767.06250000	2861865.00000000	-1208413.00000000	-6764649.50000000	2742017.75000000	-517512.37500000	-949041.37500000	1510996.00000000	-2126663.50000000	-4569773.50000000	713773.62500000	5341426.00000000	1495171.00000000	2959597.25000000	5120634.50000000	-3028771.25000000	2012748.75000000	1838520.12500000	-332190.06250000
251.19487000	-1689974.12500000	-1112111.25000000	-1999105.75000000	-3873280.75000000	1194587.62500000	357173.90625000	-2770449.75000000	-1030795.75000000	-2577515.50000000	5581435.00000000	-2808554.75000000	-1010879.25000000	5289201.00000000	1118835.87500000	-1018566.87500000	842601.18750000	-2263291.25000000	-160894.90625000	-2335106.25000000	3303768.25000000	-2713547.75000000	7178207.00000000	2278753.50000000	3339433.75000000	-4445465.00000000	-1264059.37500000	44355.15234375	-22138.44921875	-2070503.12500000	-2451910.50000000	-1473552.75000000	2910855.25000000	-1180851.37500000	-6612070.50000000	2673327.25000000	-831541.81250000	-807399.50000000	1238052.87500000	-1912646.62500000	-4739573.00000000	879533.50000000	5677701.00000000	1316235.25000000	3227884.50000000	5062396.00000000	-2919789.00000000	1806514.62500000	1849171.37500000	-971364.62500000
251.16304016	-1896686.00000000	-981914.56250000	-2507717.25000000	-3900022.25000000	1399808.75000000	947927.50000000	-2590654.50000000	-1046212.62500000	-2662016.25000000	5757096.00000000	-3112080.00000000	-840987.25000000	5312435.50000000	1257681.50000000	-1214358.75000000	807432.00000000	-2402186.75000000	-9141.19433594	-2048368.62500000	2857125.75000000	-2453119.50000000	6812884.00000000	2614977.00000000	3601528.00000000	-4472162.50000000	-937597.12500000	178124.96875000	8666.39355469	-1928980.50000000	-2654641.50000000	-1914977.12500000	2859364.75000000	-1102717.25000000	-6357924.50000000	2498056.50000000	-1195530.87500000	-729313.68750000	1082500.37500000	-1719433.62500000	-4818084.50000000	1206631.62500000	5981154.00000000	1292370.12500000	3276550.50000000	5101965.50000000	-2831192.50000000	1557574.12500000	1799246.37500000	-1452475.75000000
251.13121033	-2100531.25000000	-752452.43750000	-2987430.00000000	-3899373.50000000	1640861.37500000	1523593.00000000	-2408118.00000000	-1161133.00000000	-2764603.00000000	6117958.50000000	-3289019.00000000	-753008.43750000	5194641.50000000	1342589.00000000	-1433513.62500000	837971.81250000	-2478088.00000000	161588.56250000	-1736369.87500000	2350843.50000000	-2176150.25000000	6439174.00000000	2976470.25000000	3727988.25000000	-4349267.50000000	-655524.12500000	431861.84375000	51448.13281250	-1828616.50000000	-2903653.25000000	-2342748.75000000	2750094.25000000	-1007349.00000000	-6044094.50000000	2266379.00000000	-1623813.37500000	-754371.93750000	1049927.00000000	-1630393.75000000	-4832575.50000000	1702361.50000000	6256495.00000000	1429024.87500000	3065334.25000000	5134403.00000000	-2781766.25000000	1277491.87500000	1696701.25000000	-1791842.62500000
251.09934998	-2250653.25000000	-440246.71875000	-3349596.25000000	-3879247.75000000	1916052.87500000	2064829.12500000	-2261309.50000000	-1350689.12500000	-2871726.00000000	6540756.50000000	-3388580.25000000	-698083.75000000	4931408.50000000	1372339.00000000	-1617456.87500000	939324.75000000	-2498470.75000000	359206.46875000	-1419293.62500000	1779602.50000000	-1975525.50000000	6042192.00000000	3295489.00000000	3745742.50000000	-4129537.50000000	-389245.28125000	748866.31250000	73593.78125000	-1750226.25000000	-3155454.50000000	-2739938.25000000	2629400.25000000	-935944.12500000	-5715331.00000000	2046091.12500000	-2088887.50000000	-889414.00000000	1157217.50000000	-1700649.25000000	-4791523.00000000	2325258.50000000	6486108.50000000	1701063.25000000	2617632.00000000	5061254.00000000	-2769870.50000000	989637.68750000	1572950.12500000	-2002873.75000000
251.06752014	-2278943.25000000	-105318.83593750	-3495943.00000000	-3849543.50000000	2224376.50000000	2557238.50000000	-2187018.25000000	-1561575.75000000	-2968316.00000000	6893732.50000000	-3429316.00000000	-609251.18750000	4587988.50000000	1398140.50000000	-1715424.62500000	1045265.25000000	-2501145.00000000	571841.37500000	-1172191.87500000	1147337.00000000	-1906001.12500000	5623624.00000000	3526514.25000000	3674426.25000000	-3824870.25000000	-141620.96875000	1079513.25000000	91453.97656250	-1625345.62500000	-3418692.00000000	-3057568.50000000	2505189.25000000	-918731.43750000	-5422849.50000000	1877673.50000000	-2506345.25000000	-1101596.87500000	1411282.75000000	-1925090.12500000	-4679284.00000000	3008953.75000000	6610463.50000000	2051884.00000000	2005646.75000000	4862679.50000000	-2753344.00000000	720788.93750000	1479458.75000000	-2077362.87500000
251.03567505	-2144571.25000000	172568.98437500	-3368522.50000000	-3789369.25000000	2562374.00000000	2962498.00000000	-2181366.50000000	-1746679.87500000	-3032359.50000000	7100254.00000000	-3404101.75000000	-467076.18750000	4291048.00000000	1472607.62500000	-1717893.00000000	1063599.12500000	-2533724.00000000	791879.06250000	-1077431.37500000	472880.50000000	-1964753.50000000	5222714.50000000	3648980.75000000	3532850.25000000	-3425235.75000000	25090.51367188	1391466.37500000	144013.82812500	-1389342.50000000	-3687904.00000000	-3219573.75000000	2350690.25000000	-974493.62500000	-5207471.50000000	1757724.37500000	-2780019.75000000	-1334955.37500000	1794973.62500000	-2250540.00000000	-4485775.50000000	3682504.75000000	6570317.50000000	2392416.00000000	1320203.12500000	4602578.50000000	-2666014.00000000	494619.84375000	1458842.50000000	-2003336.00000000
251.00384521	-1870128.37500000	336549.00000000	-3001080.00000000	-3657367.25000000	2905248.50000000	3232129.50000000	-2183134.00000000	-1887289.25000000	-3044649.75000000	7160064.00000000	-3309078.50000000	-323741.78125000	4174354.75000000	1594830.62500000	-1672336.12500000	955783.31250000	-2604776.25000000	1029445.75000000	-1165017.12500000	-213398.34375000	-2098594.75000000	4904214.00000000	3647108.75000000	3342916.00000000	-2937371.25000000	30868.18750000	1679045.75000000	259673.37500000	-1040815.68750000	-3887292.00000000	-3157628.25000000	2144122.75000000	-1122370.62500000	-5072676.50000000	1665823.75000000	-2878847.00000000	-1543581.62500000	2276139.50000000	-2616582.75000000	-4240773.50000000	4275734.50000000	6372096.50000000	2619135.25000000	641768.00000000	4374063.50000000	-2455542.00000000	325773.43750000	1510624.50000000	-1783312.12500000
250.97201538	-1526085.37500000	385369.90625000	-2512330.75000000	-3446004.00000000	3189351.75000000	3351610.50000000	-2103469.00000000	-1986541.50000000	-3010554.75000000	7120130.00000000	-3171721.25000000	-263855.90625000	4301424.50000000	1709429.62500000	-1666830.50000000	766656.00000000	-2668502.50000000	1284354.12500000	-1399692.12500000	-873266.81250000	-2228168.25000000	4716769.00000000	3496165.50000000	3117550.25000000	-2404637.00000000	-159939.90625000	1960563.50000000	442527.81250000	-651649.31250000	-3898015.75000000	-2853226.25000000	1893800.25000000	-1382461.00000000	-4982030.50000000	1608869.50000000	-2867374.50000000	-1716397.75000000	2824856.00000000	-2986412.00000000	-4012824.75000000	4722530.00000000	6107036.00000000	2657972.00000000	28300.17187500	4243978.50000000	-2105995.50000000	213465.48437500	1591482.62500000	-1432315.37500000
250.94015503	-1174476.75000000	369397.96875000	-2031277.37500000	-3216822.75000000	3324327.50000000	3361848.00000000	-1884123.12500000	-2047312.37500000	-2965423.75000000	7031295.00000000	-3052978.75000000	-335711.75000000	4621157.00000000	1757069.75000000	-1780637.37500000	576513.93750000	-2678650.50000000	1507717.50000000	-1720894.87500000	-1465576.37500000	-2272541.50000000	4657581.50000000	3179637.75000000	2853057.00000000	-1892720.37500000	-515593.93750000	2250132.25000000	674315.00000000	-316648.96875000	-3651687.25000000	-2359938.00000000	1622860.87500000	-1752657.37500000	-4889802.00000000	1638677.75000000	-2852022.75000000	-1873427.12500000	3417940.00000000	-3346451.75000000	-3869065.00000000	4972010.50000000	5901417.00000000	2506811.00000000	-479978.06250000	4237860.50000000	-1632727.00000000	140971.79687500	1657061.50000000	-976215.62500000
250.90832520	-829379.12500000	350659.62500000	-1619368.87500000	-3066922.00000000	3237835.50000000	3329941.75000000	-1536892.75000000	-2060026.50000000	-2946507.75000000	6923124.00000000	-3016800.00000000	-510061.56250000	4995078.50000000	1720372.12500000	-2032098.37500000	433076.06250000	-2658105.25000000	1610251.25000000	-2085843.75000000	-1957686.62500000	-2165829.00000000	4680000.50000000	2727216.50000000	2545498.50000000	-1458755.00000000	-958360.87500000	2521223.75000000	914132.18750000	-87865.88281250	-3197950.25000000	-1789471.62500000	1343047.37500000	-2180462.00000000	-4773621.00000000	1824909.00000000	-2896700.50000000	-2037941.00000000	4030854.25000000	-3688467.25000000	-3835436.00000000	5000455.00000000	5840820.50000000	2238712.25000000	-853073.37500000	4354628.00000000	-1071699.12500000	84298.25000000	1702117.50000000	-469461.62500000
250.87648010	-473179.65625000	359905.28125000	-1262211.37500000	-3058951.00000000	2920402.25000000	3297509.75000000	-1134022.25000000	-2010729.62500000	-2953238.00000000	6794199.50000000	-3089557.25000000	-697266.62500000	5273432.00000000	1622650.87500000	-2367496.75000000	331630.93750000	-2697131.25000000	1523022.62500000	-2472083.00000000	-2338082.75000000	-1872860.37500000	4740272.00000000	2232065.25000000	2215926.75000000	-1132186.25000000	-1396659.25000000	2702974.25000000	1094488.62500000	48631.91406250	-2679777.75000000	-1265180.37500000	1056661.37500000	-2565838.75000000	-4639281.50000000	2205776.25000000	-2993240.75000000	-2208718.50000000	4629625.00000000	-3996956.75000000	-3894752.50000000	4815476.00000000	5926031.50000000	1959008.50000000	-1075107.50000000	4576500.50000000	-483152.50000000	19467.99804688	1752319.62500000	-10820.29394531
250.84463501	-102843.60156250	386354.03125000	-929186.18750000	-3190141.75000000	2432757.75000000	3257479.75000000	-765157.25000000	-1898986.25000000	-2935732.50000000	6607063.00000000	-3245987.00000000	-806329.56250000	5359407.00000000	1494896.50000000	-2702943.00000000	244806.46875000	-2872412.25000000	1251698.87500000	-2849807.50000000	-2615568.00000000	-1409241.00000000	4838555.00000000	1818454.37500000	1911073.37500000	-917534.81250000	-1750302.00000000	2724926.50000000	1132062.12500000	139670.60937500	-2242711.25000000	-869345.12500000	780956.25000000	-2807582.00000000	-4507025.00000000	2754331.00000000	-3104597.75000000	-2354590.00000000	5167184.50000000	-4246106.00000000	-4013937.50000000	4455308.50000000	6082552.00000000	1751899.37500000	-1158473.62500000	4864308.00000000	44102.14843750	-78789.88281250	1817130.75000000	284551.43750000
250.81278992	253612.18750000	401859.15625000	-629816.87500000	-3427794.00000000	1870432.12500000	3176095.25000000	-500077.56250000	-1749033.00000000	-2825534.50000000	6303195.50000000	-3436797.00000000	-800057.75000000	5223333.50000000	1353555.87500000	-2979779.25000000	150487.75000000	-3174925.00000000	870820.50000000	-3168104.75000000	-2802607.75000000	-852954.75000000	5013157.50000000	1576839.75000000	1673109.62500000	-804815.31250000	-1976379.12500000	2571971.75000000	962233.68750000	215598.82812500	-1959295.75000000	-619866.25000000	553715.68750000	-2861909.00000000	-4407004.00000000	3378808.25000000	-3216637.50000000	-2435296.25000000	5581924.00000000	-4395397.50000000	-4159337.50000000	3988007.75000000	6204849.50000000	1655596.00000000	-1151730.87500000	5158289.00000000	415236.25000000	-237469.50000000	1862034.00000000	356078.37500000
250.78096008	570837.37500000	387590.87500000	-410227.43750000	-3758590.25000000	1315797.75000000	3032767.25000000	-377256.84375000	-1605737.37500000	-2580822.25000000	5854945.00000000	-3630941.00000000	-710381.18750000	4879688.00000000	1203951.00000000	-3183941.50000000	28534.62500000	-3520516.25000000	470137.43750000	-3375654.00000000	-2900083.00000000	-325203.21875000	5292645.00000000	1517327.12500000	1510041.62500000	-770302.56250000	-2090698.50000000	2295931.00000000	577101.00000000	273075.56250000	-1817552.62500000	-493677.43750000	403749.06250000	-2764857.25000000	-4384620.50000000	3950498.50000000	-3337576.75000000	-2433656.50000000	5806214.50000000	-4386161.50000000	-4282469.50000000	3504121.75000000	6205907.00000000	1669910.37500000	-1124337.12500000	5400978.00000000	574183.18750000	-470309.53125000	1836137.12500000	250915.07812500
250.74913025	863958.50000000	336180.37500000	-306353.75000000	-4190782.50000000	812977.62500000	2837398.75000000	-406172.03125000	-1516697.25000000	-2208705.00000000	5323646.00000000	-3829051.75000000	-612324.62500000	4362549.00000000	1050761.37500000	-3323644.25000000	-148433.48437500	-3813912.00000000	108003.17968750	-3451018.75000000	-2900745.50000000	59836.07031250	5650261.50000000	1579241.37500000	1398967.75000000	-772086.68750000	-2156610.25000000	1975175.25000000	34895.82421875	297423.59375000	-1755631.12500000	-475285.53125000	319342.71875000	-2601848.50000000	-4486683.00000000	4345862.50000000	-3459272.00000000	-2374808.00000000	5796739.50000000	-4158937.75000000	-4307332.50000000	3093838.25000000	6050727.00000000	1770043.00000000	-1129632.62500000	5567433.00000000	529076.12500000	-755466.62500000	1724502.12500000	101431.89062500
250.71726990	1175547.75000000	237043.46875000	-310270.25000000	-4714893.50000000	377975.68750000	2611161.00000000	-568050.56250000	-1509746.87500000	-1755500.25000000	4854936.50000000	-4035689.75000000	-581963.06250000	3715670.75000000	899552.93750000	-3404390.00000000	-398863.12500000	-3986985.00000000	-196877.21875000	-3409762.50000000	-2805495.25000000	244240.87500000	5999197.00000000	1683773.87500000	1317348.75000000	-761512.87500000	-2233701.75000000	1666432.62500000	-568417.31250000	289406.06250000	-1701596.75000000	-583576.56250000	254835.20312500	-2454683.00000000	-4718348.50000000	4489890.50000000	-3541219.25000000	-2315034.00000000	5574011.00000000	-3699992.50000000	-4156696.25000000	2816532.50000000	5760635.50000000	1907776.00000000	-1171282.50000000	5671112.00000000	329051.28125000	-1031022.81250000	1564674.12500000	38845.55078125
250.68544006	1518461.25000000	71727.29687500	-376569.12500000	-5280116.50000000	26756.45507813	2349875.75000000	-820392.50000000	-1580568.62500000	-1285441.37500000	4588227.00000000	-4223634.50000000	-664182.62500000	2992266.25000000	755536.25000000	-3431242.75000000	-703272.87500000	-3992683.50000000	-448541.65625000	-3288063.50000000	-2630855.00000000	239234.51562500	6230112.00000000	1779355.00000000	1266714.37500000	-714971.68750000	-2328428.50000000	1391814.25000000	-1142778.25000000	265909.43750000	-1602611.25000000	-848987.43750000	169327.37500000	-2369685.00000000	-5008063.50000000	4382767.00000000	-3542741.50000000	-2304922.25000000	5230651.50000000	-3085487.50000000	-3804492.50000000	2684851.75000000	5389080.50000000	2009521.00000000	-1204392.50000000	5733809.50000000	17226.72656250	-1222289.00000000	1411691.25000000	113547.60156250
250.65359497	1839355.62500000	-172680.48437500	-450201.40625000	-5815390.00000000	-208360.34375000	2005080.87500000	-1117594.75000000	-1700376.12500000	-866574.12500000	4550664.50000000	-4330607.00000000	-860438.81250000	2257549.25000000	627196.00000000	-3423523.25000000	-1002262.68750000	-3806436.00000000	-653671.93750000	-3129601.00000000	-2397388.25000000	99177.96875000	6263498.50000000	1843249.75000000	1262335.62500000	-657496.43750000	-2396274.25000000	1156033.87500000	-1634393.62500000	243577.92187500	-1448715.00000000	-1263129.62500000	53799.59375000	-2360294.75000000	-5227964.00000000	4087323.50000000	-3465836.50000000	-2354983.75000000	4883444.50000000	-2473128.25000000	-3299253.25000000	2672317.25000000	4987105.00000000	1990708.75000000	-1179067.87500000	5745506.50000000	-388174.53125000	-1283449.25000000	1294658.12500000	278908.62500000
250.62174988	2049927.37500000	-488646.59375000	-491927.75000000	-6264440.50000000	-292229.40625000	1507050.50000000	-1439911.25000000	-1835896.37500000	-561845.25000000	4637214.00000000	-4292452.00000000	-1135503.50000000	1591191.62500000	525965.50000000	-3408597.00000000	-1232726.12500000	-3457592.75000000	-804039.75000000	-2988911.50000000	-2113753.50000000	-114359.39062500	6088570.00000000	1853875.62500000	1298285.37500000	-644255.25000000	-2390716.25000000	959613.25000000	-2032793.25000000	234860.71875000	-1284706.37500000	-1754248.87500000	-80221.17968750	-2423193.50000000	-5267599.00000000	3678028.00000000	-3360619.00000000	-2432725.75000000	4599256.50000000	-2028204.37500000	-2728714.25000000	2731239.75000000	4585775.50000000	1788655.25000000	-1096048.25000000	5654126.50000000	-870834.56250000	-1223573.87500000	1209609.37500000	432519.53125000
250.58992004	2098372.75000000	-845728.75000000	-496505.87500000	-6593656.50000000	-219521.59375000	822116.56250000	-1806560.75000000	-1960305.62500000	-415549.40625000	4694779.50000000	-4082379.50000000	-1438612.00000000	1076629.50000000	450935.40625000	-3392562.00000000	-1369150.00000000	-3039665.25000000	-867777.37500000	-2932976.75000000	-1778619.00000000	-353127.53125000	5772087.50000000	1778342.37500000	1323777.37500000	-708417.00000000	-2304389.75000000	793536.31250000	-2361885.25000000	260455.79687500	-1191069.87500000	-2218345.25000000	-230532.45312500	-2544082.00000000	-5103859.00000000	3189942.50000000	-3290225.25000000	-2493035.50000000	4358205.00000000	-1835859.75000000	-2163305.25000000	2802930.50000000	4204771.00000000	1394938.00000000	-1026846.75000000	5400151.50000000	-1392628.00000000	-1102463.37500000	1141484.75000000	472073.15625000
250.55807495	2011111.75000000	-1194567.50000000	-499394.81250000	-6776197.00000000	-33141.02343750	4179.91455078	-2260857.25000000	-2044959.50000000	-439155.03125000	4627164.00000000	-3728131.25000000	-1727869.50000000	765487.12500000	372205.78125000	-3341964.50000000	-1433234.62500000	-2654981.75000000	-805803.56250000	-3018224.75000000	-1402914.50000000	-587180.43750000	5431496.50000000	1597944.12500000	1260142.00000000	-827848.93750000	-2167284.75000000	635144.87500000	-2661282.00000000	351041.71875000	-1234189.87500000	-2579302.25000000	-414389.21875000	-2690728.00000000	-4809143.50000000	2617890.00000000	-3291842.25000000	-2513201.00000000	4084733.25000000	-1871511.75000000	-1639619.62500000	2823275.75000000	3868443.75000000	865054.12500000	-1075377.00000000	4969316.00000000	-1907801.50000000	-1001392.56250000	1076952.37500000	337451.87500000
250.52624512	1869763.62500000	-1470142.37500000	-555046.62500000	-6786910.50000000	195910.10937500	-805266.37500000	-2841247.00000000	-2049173.87500000	-611159.87500000	4432466.00000000	-3303336.75000000	-1981593.50000000	634835.18750000	239073.98437500	-3203964.25000000	-1470544.12500000	-2343820.75000000	-611415.93750000	-3251216.50000000	-1030183.00000000	-805722.31250000	5178811.50000000	1343098.87500000	1053380.00000000	-950038.87500000	-2022912.25000000	463905.87500000	-2961366.00000000	522304.68750000	-1420013.37500000	-2822098.25000000	-648265.81250000	-2807139.75000000	-4494926.00000000	1971189.62500000	-3364382.00000000	-2503033.75000000	3712589.75000000	-2048705.75000000	-1192541.75000000	2735693.00000000	3603870.50000000	295860.28125000	-1308742.50000000	4419258.00000000	-2395291.50000000	-984045.43750000	994935.62500000	32845.46484375
250.49438477	1753948.62500000	-1605989.00000000	-686529.37500000	-6618644.00000000	413833.84375000	-1437868.12500000	-3557363.50000000	-1933315.50000000	-894305.18750000	4167810.25000000	-2902590.50000000	-2188761.50000000	586551.62500000	14909.83984375	-2952158.50000000	-1518361.25000000	-2086182.75000000	-331998.90625000	-3570866.00000000	-730916.75000000	-1015347.87500000	5061554.50000000	1090979.50000000	720244.62500000	-1051363.75000000	-1918207.50000000	284058.15625000	-3262611.50000000	750486.06250000	-1688190.75000000	-2972969.00000000	-923442.87500000	-2820699.50000000	-4238773.00000000	1329807.62500000	-3482158.25000000	-2488784.25000000	3225339.75000000	-2291247.50000000	-880946.68750000	2509728.25000000	3419962.50000000	-221214.85937500	-1711180.62500000	3858595.50000000	-2857937.50000000	-1066108.37500000	861404.00000000	-377576.25000000
250.46255493	1701376.75000000	-1568704.00000000	-849525.56250000	-6295152.50000000	612705.12500000	-1778317.50000000	-4375828.50000000	-1693826.87500000	-1253564.12500000	3900345.75000000	-2608463.50000000	-2335064.75000000	513919.00000000	-291019.21875000	-2619595.75000000	-1585146.75000000	-1876106.62500000	-35312.42187500	-3880362.75000000	-568663.75000000	-1229496.62500000	5037664.00000000	916323.50000000	343483.75000000	-1165213.50000000	-1903229.87500000	127647.19531250	-3534986.50000000	984950.18750000	-1949094.50000000	-3055490.50000000	-1206671.37500000	-2664187.25000000	-4047966.25000000	836444.25000000	-3616339.75000000	-2492985.00000000	2650226.25000000	-2564090.50000000	-760038.00000000	2147786.75000000	3290708.50000000	-646397.93750000	-2194031.25000000	3397307.00000000	-3279559.00000000	-1211701.62500000	651038.68750000	-809529.62500000
250.43070984	1702960.00000000	-1389244.00000000	-959112.31250000	-5861472.50000000	817025.31250000	-1805291.37500000	-5215309.00000000	-1387600.87500000	-1657650.75000000	3681728.25000000	-2461603.00000000	-2408334.00000000	388286.15625000	-624944.00000000	-2294078.25000000	-1648353.25000000	-1767523.37500000	252162.64062500	-4112380.75000000	-562274.56250000	-1452732.50000000	5003678.00000000	836784.50000000	12867.51562500	-1347547.75000000	-2011308.50000000	34580.59375000	-3739752.00000000	1188850.37500000	-2132382.75000000	-3070389.00000000	-1467151.62500000	-2308745.25000000	-3876803.00000000	618693.00000000	-3749744.75000000	-2526478.00000000	2029248.50000000	-2852292.00000000	-825699.56250000	1673570.00000000	3164810.75000000	-1006312.81250000	-2646544.00000000	3105017.75000000	-3596548.50000000	-1360158.50000000	374439.53125000	-1217032.50000000
250.39888000	1716204.87500000	-1150199.50000000	-966599.25000000	-5367487.50000000	1047267.06250000	-1571480.62500000	-5960964.50000000	-1116769.50000000	-2067954.75000000	3534978.75000000	-2452602.25000000	-2421245.75000000	280434.81250000	-919384.06250000	-2081335.62500000	-1672640.37500000	-1823516.50000000	559366.93750000	-4276501.00000000	-674274.18750000	-1672575.87500000	4857070.00000000	801693.31250000	-236907.65625000	-1618353.00000000	-2223131.75000000	32562.87109375	-3854798.25000000	1358105.87500000	-2216730.00000000	-3012476.25000000	-1702663.62500000	-1794055.87500000	-3674674.00000000	705110.93750000	-3880644.25000000	-2589094.25000000	1398635.25000000	-3132198.50000000	-1000759.75000000	1119902.00000000	2997915.25000000	-1361746.50000000	-2986580.50000000	2998602.50000000	-3735051.00000000	-1460912.37500000	70931.17968750	-1620195.37500000
250.36703491	1683461.50000000	-926954.87500000	-910059.25000000	-4867251.50000000	1300543.62500000	-1153901.50000000	-6506859.50000000	-978922.75000000	-2434439.25000000	3442499.75000000	-2543275.25000000	-2417447.75000000	287375.56250000	-1126648.37500000	-2058841.12500000	-1642996.25000000	-2030777.62500000	908593.25000000	-4447228.00000000	-835350.93750000	-1863196.00000000	4548919.50000000	728909.87500000	-432483.12500000	-1941685.12500000	-2459682.25000000	134626.25000000	-3883829.00000000	1493943.75000000	-2232578.50000000	-2894414.25000000	-1937149.12500000	-1231060.50000000	-3426060.75000000	1007370.37500000	-4017328.25000000	-2670665.75000000	784075.50000000	-3369989.00000000	-1190484.50000000	533054.25000000	2783707.25000000	-1750353.62500000	-3185088.75000000	3052953.00000000	-3685244.00000000	-1489965.75000000	-236150.96875000	-2070435.25000000
250.33518982	1557838.75000000	-739413.93750000	-882920.37500000	-4425554.50000000	1559960.62500000	-620690.93750000	-6806530.50000000	-1015324.37500000	-2708170.50000000	3355475.00000000	-2697680.75000000	-2439957.50000000	433410.75000000	-1237660.62500000	-2242338.25000000	-1588624.87500000	-2289933.00000000	1245271.25000000	-4700729.00000000	-985852.93750000	-1991829.87500000	4094892.50000000	553446.06250000	-608635.37500000	-2258647.25000000	-2629901.50000000	344381.43750000	-3852034.00000000	1569018.37500000	-2244046.25000000	-2745832.25000000	-2188438.00000000	-759501.31250000	-3157274.00000000	1380639.25000000	-4169338.50000000	-2755872.25000000	203661.87500000	-3536906.00000000	-1354895.25000000	-18047.53710938	2559583.50000000	-2150050.50000000	-3266546.75000000	3218899.00000000	-3529466.50000000	-1445991.87500000	-574591.25000000	-2584310.50000000
250.30335999	1333008.25000000	-568888.18750000	-953729.50000000	-4104367.75000000	1806663.00000000	-30395.13867188	-6890738.50000000	-1186107.75000000	-2858629.25000000	3239591.75000000	-2893010.75000000	-2491064.25000000	641919.37500000	-1284688.62500000	-2578895.25000000	-1571109.12500000	-2493975.50000000	1448784.75000000	-5052519.00000000	-1103107.62500000	-2023667.25000000	3547665.75000000	253066.45312500	-755612.62500000	-2531262.00000000	-2695821.25000000	648632.12500000	-3802898.00000000	1540083.50000000	-2317324.00000000	-2592907.00000000	-2434487.25000000	-477413.65625000	-2914549.50000000	1709101.87500000	-4340280.00000000	-2838191.75000000	-326122.21875000	-3613777.00000000	-1524934.25000000	-455535.62500000	2381366.25000000	-2491946.00000000	-3296321.00000000	3439411.50000000	-3386737.00000000	-1351019.50000000	-1002322.12500000	-3116124.50000000
250.27149963	1052858.00000000	-420960.28125000	-1121065.75000000	-3929390.25000000	2011833.87500000	556914.18750000	-6834853.00000000	-1384030.75000000	-2878475.00000000	3120790.25000000	-3106793.50000000	-2535277.75000000	796446.00000000	-1328692.50000000	-2968239.50000000	-1641118.75000000	-2598864.75000000	1420602.87500000	-5446495.00000000	-1199350.75000000	-1934643.75000000	2960410.25000000	-153004.98437500	-825768.68750000	-2756153.75000000	-2692750.00000000	998832.43750000	-3793580.75000000	1396882.75000000	-2485834.00000000	-2448374.75000000	-2612547.00000000	-393309.25000000	-2738492.00000000	1954485.25000000	-4522358.00000000	-2932522.00000000	-783715.87500000	-3588384.75000000	-1751790.62500000	-733112.50000000	2282841.00000000	-2706061.25000000	-3357471.25000000	3662318.00000000	-3330768.50000000	-1262041.12500000	-1541671.00000000	-3599374.25000000
250.23966980	783467.18750000	-356984.34375000	-1339232.00000000	-3873156.00000000	2124195.75000000	1079337.12500000	-6707439.00000000	-1483854.25000000	-2775690.75000000	3075135.25000000	-3307971.00000000	-2550279.50000000	820000.43750000	-1427825.62500000	-3299406.00000000	-1805858.37500000	-2615031.50000000	1154023.87500000	-5797070.00000000	-1301143.62500000	-1737752.12500000	2370458.25000000	-618232.37500000	-791002.06250000	-2952790.50000000	-2690141.00000000	1306803.37500000	-3869969.00000000	1181323.00000000	-2729986.00000000	-2323913.50000000	-2657626.50000000	-441074.09375000	-2653904.25000000	2148183.25000000	-4690397.50000000	-3066503.00000000	-1143462.50000000	-3471222.00000000	-2048274.75000000	-868241.18750000	2249981.50000000	-2758467.00000000	-3516104.00000000	3846521.25000000	-3367739.75000000	-1265703.50000000	-2131408.25000000	-4010050.25000000
250.20782471	567886.50000000	-451118.31250000	-1568221.62500000	-3880553.25000000	2085114.25000000	1483881.12500000	-6546038.00000000	-1409122.37500000	-2568210.00000000	3162639.75000000	-3471082.50000000	-2565784.75000000	699149.25000000	-1598036.12500000	-3483354.75000000	-2040994.75000000	-2559386.00000000	716653.43750000	-6039611.00000000	-1432385.50000000	-1502710.00000000	1810622.75000000	-1089216.62500000	-685698.37500000	-3155810.75000000	-2736971.25000000	1474578.50000000	-4023880.50000000	944639.50000000	-2984136.25000000	-2243201.00000000	-2548191.75000000	-542002.68750000	-2670448.50000000	2352304.75000000	-4800970.00000000	-3251697.75000000	-1389456.50000000	-3326115.00000000	-2379540.00000000	-929439.75000000	2231366.75000000	-2657340.50000000	-3787671.50000000	3961318.75000000	-3486807.50000000	-1431260.50000000	-2649276.50000000	-4381338.00000000
250.17599487	406520.12500000	-718535.68750000	-1788163.12500000	-3913653.50000000	1871015.87500000	1733593.37500000	-6367698.50000000	-1179040.37500000	-2289463.75000000	3371408.25000000	-3595985.50000000	-2636082.50000000	457579.34375000	-1797095.00000000	-3472317.50000000	-2329204.50000000	-2443971.50000000	185091.17187500	-6145166.50000000	-1609581.25000000	-1339596.87500000	1330462.12500000	-1530380.62500000	-591377.12500000	-3418893.25000000	-2836396.75000000	1446197.37500000	-4174768.00000000	692972.06250000	-3163334.25000000	-2231505.25000000	-2317960.75000000	-655696.25000000	-2779548.00000000	2622996.50000000	-4808060.50000000	-3464698.75000000	-1530265.50000000	-3269705.25000000	-2698861.25000000	-985727.50000000	2177623.50000000	-2440139.50000000	-4125087.75000000	3988766.00000000	-3711860.75000000	-1752659.75000000	-2993559.75000000	-4757565.00000000
250.14414978	278051.28125000	-1093123.12500000	-1979513.87500000	-3968611.00000000	1522238.37500000	1805296.12500000	-6181557.50000000	-899647.87500000	-1993600.87500000	3629289.75000000	-3703742.00000000	-2772169.75000000	134584.23437500	-1951699.12500000	-3270779.25000000	-2676003.75000000	-2302993.25000000	-382532.84375000	-6101310.00000000	-1841178.37500000	-1346920.62500000	999343.12500000	-1940906.25000000	-584461.62500000	-3808773.75000000	-2951834.25000000	1244575.37500000	-4215311.50000000	390268.18750000	-3189926.25000000	-2290465.75000000	-2026218.25000000	-779366.62500000	-2949794.25000000	2988402.00000000	-4693111.00000000	-3665219.25000000	-1594936.25000000	-3410034.75000000	-2980290.00000000	-1064151.62500000	2075782.75000000	-2159561.50000000	-4438651.50000000	3939540.00000000	-4088099.75000000	-2144186.00000000	-3157482.50000000	-5142127.00000000
250.11230469	170435.26562500	-1471865.37500000	-2114704.25000000	-4051178.75000000	1124720.87500000	1686792.87500000	-5981594.00000000	-704166.06250000	-1743738.62500000	3864218.50000000	-3810408.50000000	-2914921.00000000	-206533.10937500	-2007052.50000000	-2939543.25000000	-3083092.50000000	-2197825.50000000	-920243.75000000	-5897493.00000000	-2122088.25000000	-1563695.62500000	877181.81250000	-2346147.00000000	-699646.93750000	-4376339.00000000	-3024119.50000000	963622.68750000	-4095380.75000000	13382.49023438	-3010834.25000000	-2389778.00000000	-1720741.25000000	-913519.31250000	-3139913.00000000	3436175.50000000	-4485629.00000000	-3838049.50000000	-1610289.75000000	-3764607.50000000	-3217919.75000000	-1149818.00000000	1949278.75000000	-1867472.12500000	-4635313.00000000	3873220.75000000	-4619881.50000000	-2505313.00000000	-3234984.75000000	-5493560.00000000
250.08047485	84166.48437500	-1771183.25000000	-2178953.00000000	-4146081.50000000	758728.37500000	1382834.50000000	-5738055.00000000	-692361.81250000	-1583981.37500000	4045278.50000000	-3911526.25000000	-2986831.50000000	-474652.84375000	-1955730.87500000	-2579689.00000000	-3515395.00000000	-2180207.50000000	-1339201.37500000	-5540290.00000000	-2427902.50000000	-1963207.75000000	969475.68750000	-2767852.75000000	-930649.31250000	-5122495.00000000	-2994797.00000000	717608.12500000	-3864565.25000000	-413519.15625000	-2613785.50000000	-2489808.00000000	-1429839.75000000	-1043356.62500000	-3334179.00000000	3906651.25000000	-4252063.50000000	-4015241.00000000	-1584358.00000000	-4237012.00000000	-3407894.00000000	-1216708.50000000	1829929.37500000	-1591558.00000000	-4655609.50000000	3892537.25000000	-5234619.00000000	-2794400.00000000	-3354106.00000000	-5766013.00000000
250.04861450	10758.62304688	-1945541.12500000	-2187426.00000000	-4218480.50000000	460290.25000000	927123.81250000	-5414409.00000000	-911402.93750000	-1517155.25000000	4172388.00000000	-3995227.00000000	-2964724.75000000	-586756.12500000	-1827573.75000000	-2287006.25000000	-3905417.50000000	-2263816.00000000	-1569547.37500000	-5080604.50000000	-2718673.00000000	-2482973.00000000	1204790.75000000	-3201991.50000000	-1246700.12500000	-5985205.50000000	-2839506.25000000	579150.43750000	-3625931.00000000	-845375.75000000	-2044813.25000000	-2571740.00000000	-1180723.75000000	-1155361.62500000	-3570820.75000000	4298369.00000000	-4062362.00000000	-4253014.50000000	-1514744.50000000	-4680606.00000000	-3543325.00000000	-1249871.12500000	1733514.50000000	-1320420.37500000	-4495077.00000000	4095109.75000000	-5816059.00000000	-3039309.75000000	-3592154.00000000	-5947018.50000000
250.01678467	-77746.78906250	-1981237.87500000	-2169903.25000000	-4245330.00000000	222128.53125000	386654.21875000	-4999687.00000000	-1364961.25000000	-1510158.75000000	4245667.50000000	-4065044.50000000	-2891784.00000000	-524861.12500000	-1664226.75000000	-2099310.00000000	-4192502.75000000	-2441825.75000000	-1617909.25000000	-4616384.00000000	-2953617.75000000	-3054474.00000000	1457098.37500000	-3626618.00000000	-1603079.87500000	-6852760.50000000	-2595149.25000000	545343.00000000	-3448493.00000000	-1259183.12500000	-1408276.62500000	-2643898.00000000	-1011677.06250000	-1260589.75000000	-3927545.00000000	4494550.50000000	-3967990.00000000	-4584880.00000000	-1410219.75000000	-4990211.50000000	-3626789.50000000	-1240755.37500000	1655679.25000000	-1023344.25000000	-4208050.00000000	4509153.00000000	-6275536.50000000	-3287276.25000000	-3936442.75000000	-6061566.00000000
249.98495483	-208266.34375000	-1904087.87500000	-2143032.00000000	-4241343.00000000	20134.50195313	-154611.37500000	-4519978.50000000	-2007955.00000000	-1526678.12500000	4257643.50000000	-4147145.75000000	-2821735.00000000	-358623.34375000	-1506672.25000000	-1981525.87500000	-4355261.50000000	-2714652.25000000	-1569827.87500000	-4261069.50000000	-3107491.25000000	-3612759.50000000	1596684.25000000	-4023888.00000000	-1951746.12500000	-7590634.00000000	-2351153.00000000	550568.06250000	-3331483.75000000	-1651590.25000000	-830443.68750000	-2723015.00000000	-958917.06250000	-1389689.12500000	-4465515.50000000	4406702.00000000	-4006418.00000000	-4993803.00000000	-1298388.00000000	-5140137.50000000	-3679833.25000000	-1176496.87500000	1574644.62500000	-699864.43750000	-3894341.25000000	5065926.50000000	-6595650.50000000	-3557954.75000000	-4312322.50000000	-6152167.50000000
249.95310974	-377266.56250000	-1796336.12500000	-2110629.75000000	-4252531.50000000	-162495.57812500	-632436.75000000	-4017505.50000000	-2726774.00000000	-1562801.75000000	4207500.50000000	-4284973.00000000	-2767646.25000000	-208767.12500000	-1393553.87500000	-1867385.00000000	-4412210.50000000	-3077052.75000000	-1531871.00000000	-4102268.00000000	-3180414.50000000	-4102442.50000000	1531188.25000000	-4384843.00000000	-2262527.50000000	-8074292.00000000	-2202996.50000000	515060.78125000	-3250695.75000000	-2001572.00000000	-402126.96875000	-2816914.75000000	-1034307.31250000	-1562682.00000000	-5174702.50000000	4015860.25000000	-4207785.00000000	-5420360.00000000	-1211478.75000000	-5152348.00000000	-3734939.00000000	-1052258.62500000	1444041.12500000	-412256.37500000	-3669823.00000000	5635101.50000000	-6816670.00000000	-3840472.25000000	-4644998.50000000	-6260292.00000000
249.92127991	-547249.25000000	-1776988.75000000	-2090892.00000000	-4323766.00000000	-325794.25000000	-1038648.12500000	-3528053.75000000	-3358711.75000000	-1656276.50000000	4106027.25000000	-4536079.50000000	-2711885.75000000	-182363.92187500	-1351874.00000000	-1721286.25000000	-4407235.50000000	-3481048.50000000	-1574985.12500000	-4175798.75000000	-3198161.50000000	-4498152.00000000	1218497.87500000	-4693259.50000000	-2544179.75000000	-8227197.00000000	-2205916.75000000	398503.53125000	-3219787.25000000	-2263782.75000000	-146665.23437500	-2926558.25000000	-1217460.25000000	-1767355.00000000	-5960752.50000000	3386158.50000000	-4576486.50000000	-5787368.50000000	-1167698.87500000	-5049362.00000000	-3817983.00000000	-901226.75000000	1191907.50000000	-257762.45312500	-3627720.25000000	6094939.50000000	-6990118.50000000	-4112299.25000000	-4903210.50000000	-6418280.50000000
249.88941956	-673413.00000000	-1930951.62500000	-2127349.50000000	-4466152.00000000	-455435.56250000	-1424448.12500000	-3085395.25000000	-3777335.00000000	-1859654.50000000	3960831.75000000	-4962012.00000000	-2651536.75000000	-327653.31250000	-1384106.75000000	-1562995.37500000	-4404067.50000000	-3836537.00000000	-1724519.75000000	-4456908.50000000	-3202211.75000000	-4824049.00000000	666011.81250000	-4920706.50000000	-2842997.25000000	-8050886.50000000	-2362484.00000000	228595.70312500	-3286824.50000000	-2414747.00000000	-42228.42968750	-3056030.75000000	-1461323.75000000	-1966168.87500000	-6676577.00000000	2638504.50000000	-5062393.50000000	-6017879.50000000	-1164639.50000000	-4844556.00000000	-3937435.00000000	-804976.75000000	753762.50000000	-295624.28125000	-3805660.75000000	6383709.50000000	-7143924.00000000	-4345671.50000000	-5099885.00000000	-6644052.00000000
249.85758972	-732153.12500000	-2240875.75000000	-2257175.75000000	-4647557.00000000	-532712.68750000	-1853779.87500000	-2738441.50000000	-3979721.25000000	-2197293.75000000	3767610.50000000	-5587976.50000000	-2613571.25000000	-625107.68750000	-1475018.12500000	-1439624.00000000	-4481891.00000000	-4062139.50000000	-1978737.62500000	-4861448.00000000	-3229893.00000000	-5138112.50000000	-66092.51562500	-5054032.50000000	-3217482.00000000	-7622308.00000000	-2636069.00000000	92612.96093750	-3470710.25000000	-2494497.00000000	-72811.38281250	-3211435.00000000	-1695150.37500000	-2117100.75000000	-7176422.00000000	1896871.62500000	-5564712.50000000	-6048033.00000000	-1181801.00000000	-4563563.00000000	-4085462.25000000	-856111.31250000	132397.53125000	-494114.62500000	-4171823.00000000	6505447.50000000	-7279390.00000000	-4508517.00000000	-5266436.00000000	-6934130.50000000
249.82574463	-727253.68750000	-2592630.50000000	-2467699.00000000	-4812370.00000000	-550594.31250000	-2335315.00000000	-2545285.25000000	-4078669.75000000	-2642463.75000000	3527669.75000000	-6347758.00000000	-2623146.00000000	-1002584.56250000	-1621599.50000000	-1385400.62500000	-4707300.00000000	-4128110.25000000	-2318679.75000000	-5263263.50000000	-3294903.25000000	-5478702.50000000	-867706.25000000	-5129249.50000000	-3709640.50000000	-7053425.00000000	-2962377.50000000	97075.39062500	-3717480.25000000	-2586309.75000000	-250962.85937500	-3391430.75000000	-1827951.87500000	-2185829.25000000	-7374217.00000000	1237637.62500000	-5980975.00000000	-5849127.50000000	-1184211.62500000	-4256482.50000000	-4246275.00000000	-1094491.00000000	-570390.18750000	-746779.12500000	-4637777.00000000	6502808.50000000	-7389936.00000000	-4585127.50000000	-5432752.00000000	-7259522.50000000
249.79389954	-678358.25000000	-2859044.50000000	-2692092.00000000	-4917247.50000000	-526836.68750000	-2793950.25000000	-2541545.50000000	-4193549.50000000	-3137464.25000000	3274142.75000000	-7075792.00000000	-2673403.75000000	-1362499.00000000	-1849735.75000000	-1413018.87500000	-5086549.00000000	-4046212.00000000	-2708602.50000000	-5537476.00000000	-3385506.00000000	-5818864.00000000	-1609946.62500000	-5226267.00000000	-4326606.00000000	-6445782.00000000	-3257007.50000000	313324.18750000	-3930425.00000000	-2756509.25000000	-586172.31250000	-3589101.25000000	-1774229.25000000	-2150441.50000000	-7290172.50000000	669664.93750000	-6257110.50000000	-5454779.00000000	-1130410.12500000	-3982862.75000000	-4407943.50000000	-1472234.00000000	-1193476.25000000	-941990.25000000	-5095647.50000000	6423320.00000000	-7477240.00000000	-4602255.50000000	-5623763.00000000	-7570193.50000000
249.76206970	-611004.62500000	-2993196.00000000	-2853570.75000000	-4956053.50000000	-502485.62500000	-3118506.75000000	-2719847.50000000	-4348453.00000000	-3641003.50000000	3069772.50000000	-7585239.00000000	-2741140.50000000	-1622091.37500000	-2188455.25000000	-1532047.00000000	-5540231.00000000	-3836182.75000000	-3109175.00000000	-5614135.50000000	-3485143.25000000	-6077222.50000000	-2197932.00000000	-5419224.50000000	-5028727.00000000	-5878275.50000000	-3441647.50000000	736072.62500000	-4041694.75000000	-3023227.25000000	-1033214.31250000	-3808702.50000000	-1503273.62500000	-2016139.87500000	-7056478.00000000	151189.82812500	-6389719.00000000	-4966750.00000000	-991299.81250000	-3789425.75000000	-4575180.00000000	-1882403.62500000	-1603791.00000000	-1024548.25000000	-5467690.00000000	6294078.50000000	-7550872.00000000	-4617699.00000000	-5858578.00000000	-7810245.00000000
249.73022461	-556794.81250000	-3058105.25000000	-2915409.75000000	-4954198.00000000	-524865.06250000	-3251208.75000000	-3045208.00000000	-4479189.50000000	-4157599.50000000	2967157.00000000	-7781105.00000000	-2830615.25000000	-1758469.75000000	-2623922.50000000	-1754449.62500000	-5935763.00000000	-3521252.25000000	-3499524.75000000	-5503645.00000000	-3594850.50000000	-6182393.50000000	-2604873.50000000	-5729741.50000000	-5722611.50000000	-5424610.50000000	-3487570.00000000	1280919.00000000	-4052631.00000000	-3374322.00000000	-1478553.37500000	-4075573.75000000	-1072606.25000000	-1837711.37500000	-6856310.50000000	-373199.75000000	-6389060.50000000	-4520388.00000000	-771502.81250000	-3703084.75000000	-4773500.00000000	-2229057.75000000	-1759328.50000000	-1004528.93750000	-5741120.50000000	6110905.00000000	-7617697.00000000	-4671896.00000000	-6136889.00000000	-7941285.50000000
249.69839478	-556246.93750000	-3179846.25000000	-2892690.25000000	-4941347.00000000	-626719.31250000	-3236784.00000000	-3482548.50000000	-4523747.00000000	-4715690.00000000	2965911.50000000	-7706399.00000000	-2990888.75000000	-1830654.50000000	-3089455.25000000	-2069824.87500000	-6161541.00000000	-3148577.50000000	-3879368.25000000	-5272564.00000000	-3731128.25000000	-6134024.00000000	-2858596.50000000	-6128036.00000000	-6277471.00000000	-5157444.00000000	-3437766.00000000	1826515.25000000	-4015116.00000000	-3788614.75000000	-1786968.87500000	-4420728.50000000	-604031.50000000	-1718396.25000000	-6820382.50000000	-938694.56250000	-6257444.50000000	-4225981.00000000	-515107.84375000	-3737247.25000000	-5032823.00000000	-2480975.75000000	-1702896.62500000	-922555.68750000	-5959264.50000000	5848265.50000000	-7679903.50000000	-4761209.50000000	-6422436.50000000	-7964484.50000000
249.66653442	-655230.56250000	-3468275.00000000	-2824699.75000000	-4935440.50000000	-812639.81250000	-3184461.75000000	-3996997.25000000	-4481770.50000000	-5311627.50000000	3010660.25000000	-7480297.00000000	-3282912.75000000	-1952185.87500000	-3510988.50000000	-2419713.75000000	-6186178.00000000	-2787273.50000000	-4246372.00000000	-4992527.00000000	-3901580.50000000	-6005600.00000000	-2999435.50000000	-6573535.00000000	-6578002.50000000	-5113349.50000000	-3379663.75000000	2270967.75000000	-3987657.75000000	-4227337.00000000	-1874635.00000000	-4853001.50000000	-213524.06250000	-1761820.62500000	-6957313.50000000	-1543262.50000000	-6011468.50000000	-4126300.50000000	-290264.40625000	-3895578.25000000	-5354227.00000000	-2673136.00000000	-1510003.75000000	-811447.06250000	-6167716.50000000	5486880.50000000	-7749429.00000000	-4875397.00000000	-6648070.50000000	-7924569.50000000
249.63470459	-893418.50000000	-3958584.25000000	-2741585.50000000	-4954647.00000000	-1054921.37500000	-3180737.00000000	-4529380.50000000	-4384759.50000000	-5874929.50000000	3036352.00000000	-7198120.50000000	-3726732.00000000	-2224363.00000000	-3862981.00000000	-2710005.25000000	-6060827.50000000	-2494174.75000000	-4582448.00000000	-4706696.50000000	-4090272.50000000	-5889659.00000000	-3053734.75000000	-7047785.50000000	-6590162.50000000	-5250256.00000000	-3393969.50000000	2555375.25000000	-4006992.75000000	-4627282.00000000	-1754747.62500000	-5349020.00000000	45130.88671875	-2001449.50000000	-7176158.00000000	-2149148.00000000	-5713336.50000000	-4197663.50000000	-164451.93750000	-4168649.25000000	-5686146.50000000	-2869875.25000000	-1245814.50000000	-684018.93750000	-6359512.50000000	5035853.00000000	-7861771.00000000	-5055923.00000000	-6754797.50000000	-7885428.00000000
249.60285950	-1287601.12500000	-4600232.50000000	-2654023.75000000	-5035857.50000000	-1300870.25000000	-3235146.25000000	-4990818.50000000	-4238310.50000000	-6293305.50000000	3021710.25000000	-6893893.00000000	-4274359.50000000	-2675461.25000000	-4177019.00000000	-2859650.75000000	-5871532.50000000	-2291532.00000000	-4874019.00000000	-4433038.50000000	-4273141.50000000	-5836303.00000000	-3038688.25000000	-7551140.00000000	-6390165.50000000	-5453259.50000000	-3529041.50000000	2639584.75000000	-4080332.75000000	-4935446.00000000	-1528505.62500000	-5868740.00000000	177971.07812500	-2368780.25000000	-7371930.50000000	-2696920.75000000	-5460572.50000000	-4383702.00000000	-181101.10937500	-4531378.50000000	-5936581.00000000	-3127298.50000000	-955491.87500000	-544843.68750000	-6475918.00000000	4525086.50000000	-8062355.00000000	-5394246.00000000	-6742874.50000000	-7891495.50000000
249.57101440	-1815188.25000000	-5289153.00000000	-2567013.00000000	-5224494.50000000	-1496748.50000000	-3299328.25000000	-5303039.50000000	-4022378.50000000	-6476417.50000000	2999474.75000000	-6583599.00000000	-4824758.00000000	-3249465.25000000	-4500596.50000000	-2844138.50000000	-5685859.00000000	-2183069.75000000	-5141629.50000000	-4186746.25000000	-4443202.50000000	-5835133.00000000	-2974509.75000000	-8079075.50000000	-6131555.50000000	-5601392.50000000	-3808731.25000000	2470804.00000000	-4184907.75000000	-5157944.00000000	-1334858.12500000	-6373244.50000000	206443.34375000	-2738211.00000000	-7485610.00000000	-3124953.00000000	-5335842.50000000	-4626480.00000000	-337833.43750000	-4948181.50000000	-6019435.50000000	-3473434.00000000	-671400.68750000	-407118.65625000	-6471406.00000000	3974447.50000000	-8363645.50000000	-5958279.00000000	-6694785.50000000	-7949733.00000000
249.53918457	-2409530.25000000	-5917712.50000000	-2499783.75000000	-5537240.50000000	-1621795.12500000	-3324741.00000000	-5452229.00000000	-3743158.50000000	-6398737.00000000	3011421.50000000	-6313047.00000000	-5264820.50000000	-3848150.25000000	-4855090.50000000	-2697627.75000000	-5532259.50000000	-2173947.25000000	-5435229.50000000	-3993485.25000000	-4608557.00000000	-5843798.50000000	-2879165.25000000	-8606194.00000000	-5974254.50000000	-5642849.00000000	-4236499.50000000	2000805.87500000	-4274593.00000000	-5355907.50000000	-1291188.62500000	-6823913.00000000	133635.53125000	-3017811.25000000	-7491260.00000000	-3386998.75000000	-5367951.50000000	-4870663.50000000	-573122.87500000	-5384432.00000000	-5902102.00000000	-3899100.00000000	-416267.12500000	-299406.81250000	-6381554.50000000	3377050.25000000	-8708187.00000000	-6725999.00000000	-6743189.50000000	-8048512.50000000
249.50733948	-2979064.00000000	-6410891.00000000	-2493756.00000000	-5940812.50000000	-1705046.50000000	-3300653.25000000	-5500323.50000000	-3455660.25000000	-6086822.50000000	3049393.75000000	-6139844.00000000	-5512789.00000000	-4389525.00000000	-5229796.50000000	-2477818.50000000	-5417665.00000000	-2257397.25000000	-5791441.00000000	-3881697.50000000	-4762419.50000000	-5825977.50000000	-2754547.50000000	-9084270.00000000	-6024004.50000000	-5615170.00000000	-4775345.50000000	1251740.37500000	-4302559.50000000	-5580722.50000000	-1451120.87500000	-7175318.50000000	-50987.28515625	-3210249.00000000	-7355261.50000000	-3463053.00000000	-5537889.00000000	-5051003.00000000	-783059.93750000	-5820935.50000000	-5620716.50000000	-4355054.50000000	-203644.48437500	-260526.37500000	-6321800.50000000	2720455.00000000	-8977606.00000000	-7595954.00000000	-6996556.00000000	-8189379.50000000
249.47550964	-3446078.00000000	-6732205.50000000	-2601238.25000000	-6375997.50000000	-1800923.00000000	-3252723.50000000	-5538139.50000000	-3219080.50000000	-5576356.00000000	3042398.75000000	-6067912.00000000	-5546849.00000000	-4839189.50000000	-5597576.00000000	-2226634.50000000	-5358300.00000000	-2394355.75000000	-6195090.00000000	-3861066.25000000	-4865916.50000000	-5765197.00000000	-2587362.25000000	-9445498.00000000	-6308932.50000000	-5599585.50000000	-5335304.00000000	359590.56250000	-4250472.50000000	-5823497.00000000	-1791980.25000000	-7388933.00000000	-347123.93750000	-3393843.75000000	-7039595.50000000	-3363105.50000000	-5807934.50000000	-5094430.50000000	-877201.50000000	-6264398.00000000	-5256507.00000000	-4766004.00000000	-43121.95703125	-327736.62500000	-6410902.50000000	2023006.50000000	-9049232.00000000	-8452777.00000000	-7468397.00000000	-8391401.00000000
249.44364929	-3778703.75000000	-6872512.00000000	-2861315.75000000	-6800518.50000000	-1938783.00000000	-3223093.00000000	-5622923.50000000	-3041212.75000000	-4892176.00000000	2909239.75000000	-6014137.00000000	-5408214.00000000	-5200383.50000000	-5918257.50000000	-1954513.87500000	-5392820.00000000	-2538256.25000000	-6580896.50000000	-3903808.75000000	-4873970.50000000	-5656059.00000000	-2366364.25000000	-9614425.00000000	-6789816.50000000	-5655968.00000000	-5806308.50000000	-472656.90625000	-4139071.50000000	-6039884.00000000	-2233142.75000000	-7465858.00000000	-731448.75000000	-3645512.75000000	-6551953.00000000	-3125413.75000000	-6132105.50000000	-4952816.50000000	-839939.00000000	-6742328.00000000	-4893158.00000000	-5066252.00000000	54574.15625000	-522362.68750000	-6689223.50000000	1339809.75000000	-8861037.00000000	-9210218.00000000	-8060770.50000000	-8661751.00000000
249.41181946	-3990449.25000000	-6847792.00000000	-3279009.50000000	-7198939.00000000	-2095074.50000000	-3250708.00000000	-5752861.00000000	-2883323.75000000	-4071910.00000000	2631427.50000000	-5852980.00000000	-5175945.00000000	-5481231.50000000	-6130128.00000000	-1652438.00000000	-5565414.50000000	-2692358.75000000	-6868691.00000000	-3950278.00000000	-4780178.50000000	-5497855.00000000	-2094934.50000000	-9540385.00000000	-7389357.50000000	-5789470.50000000	-6117723.00000000	-1092673.87500000	-4011320.50000000	-6214081.50000000	-2675726.00000000	-7462125.50000000	-1166370.25000000	-3974746.75000000	-5974754.50000000	-2806837.50000000	-6444721.50000000	-4642409.50000000	-742058.37500000	-7276719.00000000	-4579883.00000000	-5233409.50000000	81278.78906250	-836417.62500000	-7101707.00000000	726484.43750000	-8443318.00000000	-9802938.00000000	-8618822.00000000	-8969844.00000000
249.37998962	-4112259.25000000	-6711385.50000000	-3821454.75000000	-7551071.00000000	-2218688.75000000	-3349630.50000000	-5890251.00000000	-2718494.00000000	-3202161.25000000	2277463.50000000	-5503384.50000000	-4926099.00000000	-5669276.00000000	-6161302.50000000	-1317366.37500000	-5893076.00000000	-2922606.00000000	-7001859.00000000	-3949445.50000000	-4628737.50000000	-5300620.00000000	-1789814.25000000	-9241393.00000000	-8027012.50000000	-5959497.00000000	-6266563.50000000	-1488777.75000000	-3908270.75000000	-6376814.50000000	-3043565.00000000	-7460301.00000000	-1617234.12500000	-4318312.50000000	-5426500.00000000	-2461055.50000000	-6661569.00000000	-4244830.00000000	-686256.00000000	-7852663.50000000	-4316130.50000000	-5289997.50000000	36213.66015625	-1227948.00000000	-7545858.50000000	198980.09375000	-7907459.50000000	-10171960.00000000	-9025185.00000000	-9258738.00000000
249.34814453	-4168705.00000000	-6555754.00000000	-4430384.00000000	-7805612.50000000	-2283121.75000000	-3487517.25000000	-6002987.50000000	-2573331.00000000	-2422494.75000000	1953912.62500000	-4982869.50000000	-4700838.50000000	-5729610.00000000	-5974089.50000000	-972327.93750000	-6344462.00000000	-3291249.25000000	-6969622.50000000	-3910040.25000000	-4478390.50000000	-5086561.00000000	-1478815.00000000	-8822204.00000000	-8644519.00000000	-6107068.50000000	-6292646.00000000	-1772631.25000000	-3859973.25000000	-6560274.00000000	-3304201.50000000	-7518809.00000000	-2066500.00000000	-4587005.00000000	-4991974.00000000	-2111004.75000000	-6711821.00000000	-3852454.75000000	-733803.43750000	-8410861.00000000	-4064781.00000000	-5272272.00000000	-81192.96875000	-1636237.37500000	-7926385.50000000	-268217.06250000	-7405412.00000000	-10288726.00000000	-9272035.00000000	-9481202.00000000
249.31629944	-4180031.00000000	-6482812.00000000	-5038285.00000000	-7898925.00000000	-2311335.00000000	-3587932.50000000	-6089065.00000000	-2512337.50000000	-1884706.75000000	1728137.12500000	-4389118.50000000	-4507915.50000000	-5622906.50000000	-5607074.00000000	-667986.62500000	-6847773.00000000	-3778891.50000000	-6808401.50000000	-3907099.00000000	-4359139.50000000	-4870854.00000000	-1205271.12500000	-8438464.00000000	-9209607.00000000	-6178091.00000000	-6240594.00000000	-2076180.25000000	-3889279.25000000	-6759073.50000000	-3463775.75000000	-7647779.00000000	-2521608.75000000	-4718475.50000000	-4695182.00000000	-1738441.50000000	-6573949.00000000	-3498079.00000000	-874934.68750000	-8873485.00000000	-3790732.25000000	-5199763.00000000	-282924.00000000	-2017463.37500000	-8174336.50000000	-706454.68750000	-7075946.50000000	-10198203.00000000	-9459913.00000000	-9616844.00000000
249.28445435	-4175937.75000000	-6558678.00000000	-5579295.00000000	-7798264.50000000	-2352639.25000000	-3572297.50000000	-6172454.00000000	-2592326.25000000	-1693118.87500000	1590013.25000000	-3833380.25000000	-4347333.50000000	-5330716.00000000	-5166405.50000000	-464393.03125000	-7321894.00000000	-4285338.50000000	-6580105.00000000	-4013858.75000000	-4267487.50000000	-4638195.00000000	-1021827.81250000	-8225827.50000000	-9702165.00000000	-6140065.50000000	-6151983.50000000	-2457051.25000000	-4012819.25000000	-6950295.50000000	-3549592.75000000	-7829543.50000000	-3011246.25000000	-4700738.00000000	-4534209.00000000	-1311163.00000000	-6277441.00000000	-3134764.50000000	-1057139.75000000	-9177732.00000000	-3503665.00000000	-5072364.50000000	-583033.18750000	-2379227.25000000	-8244296.50000000	-1118642.12500000	-6993882.00000000	-10025626.00000000	-9723740.00000000	-9652905.00000000
249.25262451	-4190758.00000000	-6791000.50000000	-5998376.00000000	-7518231.00000000	-2444086.00000000	-3415586.75000000	-6280683.00000000	-2832698.75000000	-1860596.37500000	1476490.37500000	-3383397.50000000	-4239929.50000000	-4877344.00000000	-4762225.50000000	-404546.71875000	-7710120.50000000	-4707353.50000000	-6335739.50000000	-4208122.00000000	-4196095.00000000	-4348575.00000000	-957664.06250000	-8244352.00000000	-10106830.00000000	-5997970.00000000	-6076620.50000000	-2880118.25000000	-4235922.50000000	-7135693.00000000	-3598574.50000000	-8050839.00000000	-3564819.25000000	-4564562.50000000	-4525394.00000000	-837195.56250000	-5871501.50000000	-2690943.50000000	-1233903.37500000	-9287222.00000000	-3270834.75000000	-4886146.50000000	-961164.43750000	-2780701.00000000	-8123232.50000000	-1474136.00000000	-7148274.50000000	-9926338.00000000	-10140993.00000000	-9557600.00000000
249.22076416	-4236116.00000000	-7143101.00000000	-6263432.50000000	-7098056.50000000	-2598562.25000000	-3165688.75000000	-6422408.00000000	-3210236.50000000	-2299449.25000000	1323726.50000000	-3055089.25000000	-4228991.50000000	-4337186.00000000	-4441464.00000000	-496449.50000000	-7997557.00000000	-5006380.00000000	-6091293.50000000	-4351072.00000000	-4154214.25000000	-3977634.00000000	-979772.06250000	-8471098.00000000	-10425270.00000000	-5804236.00000000	-6064035.50000000	-3262691.00000000	-4551133.50000000	-7337719.00000000	-3654378.25000000	-8305573.50000000	-4183126.75000000	-4362006.00000000	-4702049.00000000	-400398.00000000	-5399064.50000000	-2151495.75000000	-1394875.50000000	-9185634.00000000	-3180798.25000000	-4644078.50000000	-1334073.87500000	-3284899.00000000	-7851532.00000000	-1726158.25000000	-7469161.50000000	-10012691.00000000	-10688284.00000000	-9284309.00000000
249.18893433	-4282713.50000000	-7561164.00000000	-6373344.00000000	-6580308.00000000	-2822795.75000000	-2908881.75000000	-6580498.00000000	-3663047.00000000	-2850212.75000000	1097994.87500000	-2844577.75000000	-4348181.00000000	-3818277.50000000	-4172908.00000000	-711788.06250000	-8204802.50000000	-5207748.00000000	-5838553.00000000	-4279903.00000000	-4152251.00000000	-3552805.00000000	-992811.75000000	-8829537.00000000	-10689569.00000000	-5648619.50000000	-6134474.00000000	-3527832.50000000	-4939756.50000000	-7553311.00000000	-3761015.50000000	-8569927.00000000	-4822635.50000000	-4146113.75000000	-5073976.50000000	-136258.48437500	-4902175.00000000	-1587354.87500000	-1568530.12500000	-8882212.00000000	-3280140.75000000	-4357741.00000000	-1577667.25000000	-3892744.00000000	-7522875.50000000	-1831588.37500000	-7884898.50000000	-10303956.00000000	-11271661.00000000	-8806802.00000000
249.15710449	-4281465.50000000	-7988752.00000000	-6350093.50000000	-6021723.50000000	-3134932.75000000	-2717992.00000000	-6725967.00000000	-4103896.50000000	-3340699.75000000	791009.75000000	-2757752.00000000	-4581612.00000000	-3422431.00000000	-3891586.50000000	-997915.56250000	-8362138.00000000	-5360970.50000000	-5575001.00000000	-3939693.75000000	-4172213.25000000	-3146032.75000000	-891814.87500000	-9224877.00000000	-10948925.00000000	-5623535.00000000	-6270054.50000000	-3634683.75000000	-5365927.00000000	-7737521.00000000	-3946964.50000000	-8791246.00000000	-5409045.00000000	-3959447.50000000	-5598531.00000000	-157154.06250000	-4441589.00000000	-1105084.12500000	-1803131.87500000	-8435082.00000000	-3533751.50000000	-4055082.25000000	-1595645.50000000	-4513080.00000000	-7245096.50000000	-1767639.00000000	-8358593.50000000	-10723566.00000000	-11794585.00000000	-8152753.50000000
249.12525940	-4214161.50000000	-8373485.00000000	-6218418.50000000	-5509714.00000000	-3558119.00000000	-2629019.25000000	-6840960.50000000	-4454508.50000000	-3654174.75000000	401805.31250000	-2803552.50000000	-4858269.50000000	-3204174.75000000	-3556648.00000000	-1297965.00000000	-8478502.00000000	-5515758.00000000	-5311942.50000000	-3432956.25000000	-4164670.00000000	-2833065.50000000	-628502.75000000	-9569682.00000000	-11231532.00000000	-5780852.00000000	-6444827.00000000	-3591639.00000000	-5767332.00000000	-7851113.50000000	-4212000.00000000	-8917218.00000000	-5870853.00000000	-3835339.50000000	-6195520.00000000	-485706.84375000	-4094477.00000000	-766040.06250000	-2128747.50000000	-7956996.00000000	-3840784.00000000	-3791926.25000000	-1380581.25000000	-5000348.50000000	-7088614.00000000	-1548874.12500000	-8872195.00000000	-11144323.00000000	-12203557.00000000	-7409588.50000000
249.09341431	-4129275.75000000	-8683020.00000000	-5992483.00000000	-5138337.50000000	-4094906.50000000	-2649652.75000000	-6928578.00000000	-4687007.00000000	-3772640.25000000	-70392.53125000	-2960458.00000000	-5098970.50000000	-3158995.00000000	-3172938.25000000	-1576503.62500000	-8526590.00000000	-5716360.00000000	-5050828.50000000	-2946147.50000000	-4083859.25000000	-2665060.25000000	-238346.78125000	-9801922.00000000	-11521397.00000000	-6105982.50000000	-6657532.50000000	-3457498.50000000	-6068689.00000000	-7915443.50000000	-4531632.00000000	-8940746.00000000	-6168913.50000000	-3808434.75000000	-6790417.50000000	-1048523.18750000	-3921312.75000000	-549004.00000000	-2514800.75000000	-7571761.50000000	-4089445.00000000	-3641669.75000000	-1016001.81250000	-5238619.50000000	-7065146.00000000	-1234848.75000000	-9388853.00000000	-11461790.00000000	-12484410.00000000	-6703998.50000000
249.06156921	-4128414.00000000	-8922780.00000000	-5681577.00000000	-4950822.00000000	-4703096.50000000	-2768917.75000000	-6997719.50000000	-4833690.00000000	-3766563.00000000	-620660.37500000	-3159280.25000000	-5282519.50000000	-3251773.75000000	-2769157.25000000	-1842966.25000000	-8459630.00000000	-5984164.00000000	-4767343.00000000	-2630247.50000000	-3932064.00000000	-2673538.50000000	184804.60937500	-9896261.00000000	-11780429.00000000	-6522790.00000000	-6925090.00000000	-3320089.50000000	-6227880.50000000	-8003194.50000000	-4873234.00000000	-8910744.00000000	-6306286.50000000	-3920823.75000000	-7348790.00000000	-1725057.25000000	-3930611.75000000	-380751.87500000	-2860828.00000000	-7346346.50000000	-4206121.50000000	-3654009.50000000	-623220.25000000	-5215268.50000000	-7147975.50000000	-910165.81250000	-9852554.00000000	-11652641.00000000	-12637661.00000000	-6169452.00000000
249.02973938	-4310009.50000000	-9127766.00000000	-5302644.50000000	-4910523.00000000	-5290510.00000000	-2952875.00000000	-7037130.50000000	-4949597.50000000	-3734030.25000000	-1232653.87500000	-3308795.25000000	-5467423.50000000	-3459068.25000000	-2367855.75000000	-2153491.00000000	-8250728.00000000	-6292589.00000000	-4436914.00000000	-2538018.00000000	-3772441.00000000	-2876395.25000000	537858.93750000	-9861437.00000000	-11997019.00000000	-6921099.00000000	-7249495.00000000	-3253203.50000000	-6277495.50000000	-8176236.00000000	-5201161.50000000	-8889920.00000000	-6318190.50000000	-4210482.00000000	-7880877.00000000	-2399656.25000000	-4074473.50000000	-195213.67187500	-3046992.00000000	-7261955.00000000	-4173145.25000000	-3817170.00000000	-301301.87500000	-5037142.50000000	-7307671.00000000	-639754.56250000	-10237261.00000000	-11769777.00000000	-12676695.00000000	-5907254.50000000
248.99790955	-4709883.00000000	-9326874.00000000	-4879203.50000000	-4942075.50000000	-5738997.50000000	-3147401.25000000	-7006872.50000000	-5063968.00000000	-3729568.00000000	-1881952.25000000	-3342209.50000000	-5740004.00000000	-3787597.75000000	-1982635.75000000	-2575967.50000000	-7923409.50000000	-6572490.50000000	-4075356.00000000	-2643504.25000000	-3695083.75000000	-3251709.50000000	748853.87500000	-9724731.00000000	-12210976.00000000	-7188935.50000000	-7605909.50000000	-3284275.75000000	-6309510.00000000	-8445359.00000000	-5463650.50000000	-8895491.00000000	-6248794.50000000	-4687517.00000000	-8419868.00000000	-2977735.75000000	-4279585.50000000	31454.66992188	-3013442.50000000	-7253710.00000000	-4024029.25000000	-4067928.25000000	-102743.16406250	-4880381.00000000	-7531014.50000000	-434281.96875000	-10589938.00000000	-11874337.00000000	-12653033.00000000	-5949834.50000000
248.96604919	-5277171.50000000	-9518962.00000000	-4427887.50000000	-5004492.50000000	-5955614.50000000	-3307338.25000000	-6858550.00000000	-5168424.00000000	-3731549.50000000	-2545453.25000000	-3238972.50000000	-6130927.50000000	-4256898.00000000	-1639769.12500000	-3133095.75000000	-7545497.00000000	-6755264.00000000	-3739273.00000000	-2893894.50000000	-3758070.75000000	-3702237.50000000	796868.12500000	-9518028.00000000	-12486295.00000000	-7241511.50000000	-7966814.00000000	-3404866.75000000	-6402324.50000000	-8787360.00000000	-5586332.00000000	-8876936.00000000	-6123696.50000000	-5318454.50000000	-8989925.00000000	-3378706.50000000	-4489205.00000000	284802.84375000	-2797686.25000000	-7277955.50000000	-3831409.50000000	-4344215.00000000	-44028.17968750	-4902813.00000000	-7816455.00000000	-259635.84375000	-11010000.00000000	-11970009.00000000	-12666163.00000000	-6246074.00000000
248.93421936	-5898469.50000000	-9692656.00000000	-3956377.75000000	-5119804.50000000	-5925458.50000000	-3431615.25000000	-6566283.00000000	-5245735.00000000	-3669140.50000000	-3209289.25000000	-3007595.75000000	-6577339.50000000	-4869298.00000000	-1389748.00000000	-3767317.25000000	-7190801.00000000	-6810280.50000000	-3482137.75000000	-3244901.50000000	-3947151.50000000	-4072355.25000000	709237.93750000	-9275771.00000000	-12854265.00000000	-7049971.50000000	-8326701.50000000	-3610774.00000000	-6556326.00000000	-9176135.00000000	-5499371.00000000	-8751339.00000000	-5934558.00000000	-6029631.50000000	-9581494.00000000	-3542370.50000000	-4688146.00000000	533091.43750000	-2495122.50000000	-7341620.50000000	-3683954.50000000	-4626168.00000000	-123030.86718750	-5165980.00000000	-8159623.00000000	-83591.88281250	-11574176.00000000	-12008942.00000000	-12821029.00000000	-6686044.50000000
248.90237427	-6454443.50000000	-9864964.00000000	-3486084.50000000	-5331126.00000000	-5724319.50000000	-3563989.75000000	-6142304.50000000	-5298944.00000000	-3484580.25000000	-3869627.00000000	-2660073.50000000	-6962770.00000000	-5595461.50000000	-1286510.25000000	-4361759.50000000	-6900249.00000000	-6744795.00000000	-3322383.50000000	-3673701.25000000	-4186326.00000000	-4233321.50000000	534452.18750000	-9035435.00000000	-13275405.00000000	-6666589.00000000	-8696836.00000000	-3920705.25000000	-6702298.50000000	-9579682.00000000	-5185915.00000000	-8465130.00000000	-5654297.00000000	-6719827.00000000	-10147853.00000000	-3456584.50000000	-4899314.00000000	742789.93750000	-2187081.00000000	-7475011.50000000	-3644524.50000000	-4926646.00000000	-322003.43750000	-5610975.00000000	-8541689.00000000	85055.77343750	-12272260.00000000	-11960319.00000000	-13154838.00000000	-7153338.00000000
248.87054443	-6875732.00000000	-10081967.00000000	-3078612.00000000	-5641585.00000000	-5472248.00000000	-3750999.75000000	-5631256.00000000	-5349122.50000000	-3180816.00000000	-4525044.50000000	-2211360.50000000	-7193008.50000000	-6379773.50000000	-1352947.50000000	-4803816.00000000	-6670208.50000000	-6589800.00000000	-3260634.50000000	-4178774.75000000	-4392343.50000000	-4170841.25000000	304085.15625000	-8827327.00000000	-13649556.00000000	-6225054.00000000	-9086298.00000000	-4348281.50000000	-6772921.50000000	-9941528.00000000	-4704271.50000000	-8030623.00000000	-5279334.00000000	-7272057.50000000	-10625894.00000000	-3174497.75000000	-5159421.00000000	885442.87500000	-1908237.50000000	-7687782.50000000	-3708359.75000000	-5254436.50000000	-600615.06250000	-6104168.50000000	-8924639.00000000	201118.92187500	-13002203.00000000	-11861700.00000000	-13601070.00000000	-7567300.50000000
248.83868408	-7166105.00000000	-10367794.00000000	-2830179.50000000	-5998692.50000000	-5261435.50000000	-3995331.75000000	-5098245.50000000	-5411197.50000000	-2817151.75000000	-5165468.50000000	-1698611.62500000	-7242297.00000000	-7152962.50000000	-1572631.25000000	-5039691.00000000	-6468333.00000000	-6407079.50000000	-3308399.00000000	-4764847.00000000	-4528565.50000000	-3992582.25000000	17213.63476563	-8662035.00000000	-13865562.00000000	-5893938.00000000	-9498439.00000000	-4861084.00000000	-6764873.00000000	-10196677.00000000	-4155627.75000000	-7510461.50000000	-4863105.00000000	-7575997.50000000	-10967841.00000000	-2794494.75000000	-5491321.50000000	941688.62500000	-1671993.62500000	-7953463.00000000	-3800034.00000000	-5600039.00000000	-896818.00000000	-6522389.50000000	-9255950.00000000	222539.96875000	-13615657.00000000	-11797372.00000000	-14033126.00000000	-7890752.00000000
248.80685425	-7381763.50000000	-10677636.00000000	-2826546.50000000	-6330143.50000000	-5119213.00000000	-4248320.00000000	-4621473.50000000	-5476432.00000000	-2458467.50000000	-5766974.00000000	-1191520.75000000	-7147763.50000000	-7845490.00000000	-1919559.12500000	-5080671.50000000	-6258971.50000000	-6299324.00000000	-3472756.25000000	-5417318.50000000	-4614483.00000000	-3849664.00000000	-331517.75000000	-8538618.00000000	-13857276.00000000	-5794503.50000000	-9935924.00000000	-5380056.50000000	-6737333.00000000	-10318083.00000000	-3625258.25000000	-6967469.00000000	-4502075.50000000	-7576168.50000000	-11163193.00000000	-2417289.75000000	-5890489.00000000	902574.62500000	-1508622.12500000	-8227231.00000000	-3822847.50000000	-5953929.00000000	-1147107.75000000	-6815350.50000000	-9487072.00000000	143052.34375000	-13978666.00000000	-11839395.00000000	-14355223.00000000	-8115683.00000000
248.77502441	-7585947.00000000	-10915054.00000000	-3093720.50000000	-6584404.00000000	-5031344.50000000	-4445615.00000000	-4281157.00000000	-5512488.00000000	-2123863.00000000	-6296970.00000000	-782522.31250000	-6978778.50000000	-8406058.00000000	-2391551.25000000	-4970349.00000000	-6022646.00000000	-6375541.00000000	-3713154.25000000	-6093838.00000000	-4690964.50000000	-3847672.00000000	-705783.75000000	-8474860.00000000	-13633696.00000000	-5933882.00000000	-10386514.00000000	-5825334.50000000	-6760331.50000000	-10332524.00000000	-3150933.00000000	-6423417.00000000	-4276768.00000000	-7324604.50000000	-11238613.00000000	-2117436.00000000	-6330778.00000000	765553.43750000	-1472238.37500000	-8468277.00000000	-3723565.75000000	-6318734.50000000	-1319262.75000000	-7001079.00000000	-9601909.00000000	-12933.54687500	-14025697.00000000	-12024978.00000000	-14560708.00000000	-8253467.00000000
248.74316406	-7813282.50000000	-11003057.00000000	-3587854.00000000	-6739187.00000000	-4989864.00000000	-4552732.50000000	-4133808.50000000	-5473581.50000000	-1781331.50000000	-6726894.50000000	-568967.31250000	-6808453.00000000	-8819434.00000000	-3003783.75000000	-4753439.50000000	-5763689.50000000	-6675911.50000000	-3942367.25000000	-6750701.50000000	-4782281.50000000	-4018102.00000000	-1017988.50000000	-8524083.00000000	-13267982.00000000	-6205382.50000000	-10798121.00000000	-6159853.50000000	-6866207.00000000	-10276473.00000000	-2736088.00000000	-5859464.00000000	-4197041.50000000	-6981909.00000000	-11239284.00000000	-1941552.37500000	-6778958.50000000	528954.12500000	-1620545.50000000	-8644376.00000000	-3519399.00000000	-6688387.00000000	-1436490.25000000	-7109877.50000000	-9636612.00000000	-223657.53125000	-13794858.00000000	-12384055.00000000	-14712098.00000000	-8335265.50000000
248.71133423	-8064489.50000000	-10937474.00000000	-4231579.50000000	-6787648.50000000	-5011904.00000000	-4586266.00000000	-4181898.25000000	-5316100.50000000	-1392513.37500000	-7041778.50000000	-632126.12500000	-6688656.50000000	-9105030.00000000	-3742243.75000000	-4471237.00000000	-5504609.50000000	-7126938.00000000	-4093349.00000000	-7376442.50000000	-4890964.00000000	-4345989.50000000	-1176677.37500000	-8743691.00000000	-12855361.00000000	-6458780.50000000	-11088392.00000000	-6389884.50000000	-7036264.50000000	-10145831.00000000	-2375943.00000000	-5257240.50000000	-4200497.00000000	-6737911.50000000	-11203697.00000000	-1911611.37500000	-7200660.50000000	191534.70312500	-1994372.25000000	-8720823.00000000	-3273569.75000000	-7019068.50000000	-1571365.50000000	-7134749.00000000	-9669777.00000000	-495181.46875000	-13422439.00000000	-12957674.00000000	-14870985.00000000	-8404996.00000000
248.67948914	-8322626.50000000	-10773487.00000000	-4960355.00000000	-6730867.50000000	-5115635.00000000	-4600561.00000000	-4365062.00000000	-5021941.50000000	-962712.06250000	-7241979.50000000	-1001669.68750000	-6626232.50000000	-9290574.00000000	-4524881.00000000	-4172079.00000000	-5270060.00000000	-7580052.00000000	-4178300.00000000	-7987907.00000000	-5017848.50000000	-4798731.00000000	-1149147.50000000	-9130894.00000000	-12466305.00000000	-6586498.50000000	-11201376.00000000	-6534641.50000000	-7218054.50000000	-9909732.00000000	-2065715.75000000	-4648491.00000000	-4203700.50000000	-6700960.00000000	-11144646.00000000	-2016598.25000000	-7553269.50000000	-243339.29687500	-2604252.75000000	-8653188.00000000	-3054030.50000000	-7233940.50000000	-1808411.75000000	-7030294.00000000	-9781411.00000000	-850581.25000000	-13079389.00000000	-13760759.00000000	-15046073.00000000	-8498219.00000000
248.64765930	-8566586.00000000	-10570375.00000000	-5737969.50000000	-6584371.00000000	-5286492.50000000	-4652024.50000000	-4585487.50000000	-4621991.00000000	-547185.00000000	-7340846.50000000	-1613828.50000000	-6576724.00000000	-9385427.00000000	-5216659.00000000	-3911657.75000000	-5073281.00000000	-7900721.50000000	-4261806.50000000	-8591290.00000000	-5174173.00000000	-5324641.00000000	-980170.81250000	-9587365.00000000	-12124164.00000000	-6563772.00000000	-11155576.00000000	-6608055.00000000	-7356643.50000000	-9576625.00000000	-1800771.12500000	-4134286.25000000	-4159218.25000000	-6847297.00000000	-11045186.00000000	-2209183.75000000	-7780464.50000000	-764537.00000000	-3414971.75000000	-8399923.00000000	-2911361.25000000	-7263622.00000000	-2199097.25000000	-6750467.00000000	-10006573.00000000	-1290904.37500000	-12878270.00000000	-14725681.00000000	-15198906.00000000	-8626978.00000000
248.61579895	-8769935.00000000	-10355691.00000000	-6535828.50000000	-6382375.00000000	-5469175.50000000	-4763733.00000000	-4749275.00000000	-4198828.00000000	-210415.01562500	-7365119.50000000	-2309049.00000000	-6470410.00000000	-9384771.00000000	-5694543.50000000	-3737707.25000000	-4919747.50000000	-8030394.50000000	-4372759.00000000	-9161386.00000000	-5372149.00000000	-5840122.50000000	-755719.62500000	-9955973.00000000	-11819221.00000000	-6427362.00000000	-11022283.00000000	-6627167.00000000	-7429400.00000000	-9226645.00000000	-1594264.37500000	-3853605.00000000	-4071970.75000000	-7070132.50000000	-10870930.00000000	-2431749.00000000	-7826330.50000000	-1352734.87500000	-4334586.50000000	-7954924.50000000	-2874926.25000000	-7082229.00000000	-2743321.75000000	-6287999.00000000	-10316754.00000000	-1766628.00000000	-12817709.00000000	-15702670.00000000	-15288918.00000000	-8790939.00000000
248.58396912	-8893563.00000000	-10133922.00000000	-7308763.50000000	-6169890.00000000	-5592137.00000000	-4914915.50000000	-4794909.00000000	-3856984.50000000	16944.59765625	-7357590.00000000	-2902842.75000000	-6253434.50000000	-9300801.00000000	-5911732.50000000	-3675943.75000000	-4824767.50000000	-7987525.50000000	-4455381.50000000	-9668128.00000000	-5612131.50000000	-6237674.50000000	-552632.68750000	-10105379.00000000	-11548524.00000000	-6229566.50000000	-10852245.00000000	-6621262.50000000	-7469289.50000000	-8958767.00000000	-1501057.25000000	-3911858.00000000	-3969301.50000000	-7273529.00000000	-10589353.00000000	-2658046.75000000	-7665729.50000000	-1980090.25000000	-5227239.00000000	-7376111.00000000	-2946185.25000000	-6711010.00000000	-3409820.25000000	-5693583.00000000	-10639295.00000000	-2195710.75000000	-12806901.00000000	-16537339.00000000	-15311935.00000000	-9002671.00000000
248.55213928	-8888228.00000000	-9912875.00000000	-7999724.00000000	-5990487.00000000	-5608242.00000000	-5064697.50000000	-4699970.00000000	-3676293.75000000	141458.70312500	-7373355.00000000	-3289588.00000000	-5910186.00000000	-9183299.00000000	-5912689.50000000	-3731215.75000000	-4822635.50000000	-7836294.00000000	-4411729.00000000	-10109894.00000000	-5883556.50000000	-6419136.00000000	-415053.65625000	-9995378.00000000	-11352988.00000000	-6012942.00000000	-10634544.00000000	-6618393.00000000	-7555881.00000000	-8805429.00000000	-1605370.62500000	-4307174.00000000	-3857628.00000000	-7425376.50000000	-10182287.00000000	-2905710.75000000	-7327244.00000000	-2612258.50000000	-5949187.50000000	-6776477.50000000	-3088998.00000000	-6204983.00000000	-4172123.50000000	-5074611.50000000	-10893430.00000000	-2524870.25000000	-12743012.00000000	-17162066.00000000	-15303876.00000000	-9294445.00000000
248.52027893	-8713786.00000000	-9712594.00000000	-8569168.00000000	-5876977.50000000	-5530544.00000000	-5189901.50000000	-4479856.50000000	-3678565.00000000	175536.04687500	-7462290.00000000	-3486726.75000000	-5458566.00000000	-9102057.00000000	-5793138.50000000	-3898674.25000000	-4951242.50000000	-7655534.00000000	-4182762.75000000	-10500675.00000000	-6170331.00000000	-6333824.50000000	-357732.37500000	-9681402.00000000	-11319779.00000000	-5815687.50000000	-10333924.00000000	-6624340.50000000	-7770451.50000000	-8709895.00000000	-1959168.62500000	-4900779.50000000	-3705601.50000000	-7542439.00000000	-9647709.00000000	-3200442.75000000	-6887976.00000000	-3219601.25000000	-6383174.00000000	-6269340.50000000	-3240330.75000000	-5647664.50000000	-5022313.50000000	-4571581.50000000	-11012633.00000000	-2783331.00000000	-12575487.00000000	-17621728.00000000	-15314843.00000000	-9693900.00000000
248.48844910	-8370453.00000000	-9553040.00000000	-9013444.00000000	-5839417.50000000	-5441837.50000000	-5299465.00000000	-4188535.00000000	-3826126.50000000	111683.50781250	-7642571.50000000	-3576911.25000000	-4941837.00000000	-9108348.00000000	-5640079.00000000	-4169865.25000000	-5225470.50000000	-7510295.50000000	-3787713.25000000	-10828258.00000000	-6444855.00000000	-6002377.00000000	-375714.96875000	-9274833.00000000	-11535516.00000000	-5683614.00000000	-9960139.00000000	-6623693.50000000	-8146113.50000000	-8591786.00000000	-2522170.50000000	-5459291.00000000	-3470950.75000000	-7652365.00000000	-9001705.00000000	-3531506.00000000	-6443461.50000000	-3793682.00000000	-6460488.00000000	-5907790.00000000	-3349123.75000000	-5149103.50000000	-5948756.00000000	-4306729.50000000	-10947604.00000000	-3071668.25000000	-12322394.00000000	-18017538.00000000	-15377174.00000000	-10194256.00000000
248.45660400	-7927159.50000000	-9438226.00000000	-9346630.00000000	-5848976.00000000	-5461894.50000000	-5411363.00000000	-3911465.50000000	-4048690.00000000	-71307.20312500	-7885258.50000000	-3612793.00000000	-4428605.00000000	-9212438.00000000	-5495746.00000000	-4528482.00000000	-5625664.00000000	-7426275.50000000	-3305754.50000000	-11050565.00000000	-6660253.50000000	-5515716.00000000	-453045.09375000	-8900796.00000000	-12015381.00000000	-5664268.00000000	-9589663.00000000	-6604295.00000000	-8652986.00000000	-8428961.00000000	-3167537.75000000	-5755564.00000000	-3154025.00000000	-7780103.00000000	-8288548.50000000	-3851249.25000000	-6073238.50000000	-4350907.00000000	-6187549.50000000	-5675835.00000000	-3413807.50000000	-4821549.50000000	-6903259.00000000	-4323551.50000000	-10670432.00000000	-3480776.25000000	-12053251.00000000	-18420630.00000000	-15489850.00000000	-10751376.00000000
248.42477417	-7523062.50000000	-9348617.00000000	-9563620.00000000	-5838076.50000000	-5681604.00000000	-5522456.00000000	-3738217.50000000	-4282187.50000000	-383402.34375000	-8130482.00000000	-3585239.50000000	-3999433.50000000	-9390410.00000000	-5365501.00000000	-4942937.00000000	-6106372.50000000	-7387304.00000000	-2839243.25000000	-11146531.00000000	-6764720.50000000	-5003035.00000000	-577555.43750000	-8670154.00000000	-12665975.00000000	-5784755.00000000	-9322309.00000000	-6573145.50000000	-9224781.00000000	-8274455.50000000	-3755560.75000000	-5673574.00000000	-2835052.00000000	-7955337.50000000	-7586986.50000000	-4119386.75000000	-5818478.50000000	-4912937.50000000	-5677474.00000000	-5539297.50000000	-3481541.25000000	-4732094.00000000	-7796413.00000000	-4563555.50000000	-10196249.00000000	-4006123.25000000	-11861863.00000000	-18821160.00000000	-15626146.00000000	-11308258.00000000
248.39294434	-7320199.00000000	-9243254.00000000	-9627682.00000000	-5740056.00000000	-6105697.50000000	-5612173.00000000	-3725060.50000000	-4499882.50000000	-809634.18750000	-8333065.50000000	-3474690.25000000	-3704784.25000000	-9601110.00000000	-5254135.50000000	-5364406.50000000	-6606065.00000000	-7363565.50000000	-2482965.00000000	-11152519.00000000	-6734784.50000000	-4576593.00000000	-757002.62500000	-8658026.00000000	-13327540.00000000	-6032682.00000000	-9222869.00000000	-6541555.00000000	-9795160.00000000	-8203969.00000000	-4210369.00000000	-5255425.50000000	-2655496.25000000	-8211099.00000000	-6992025.50000000	-4337458.00000000	-5676458.50000000	-5483457.50000000	-5138303.00000000	-5497073.50000000	-3609055.75000000	-4868920.00000000	-8531409.00000000	-4909878.00000000	-9603575.00000000	-4538598.50000000	-11831290.00000000	-19141896.00000000	-15754524.00000000	-11819507.00000000
248.36108398	-7415440.50000000	-9075496.00000000	-9501205.00000000	-5552723.00000000	-6644752.50000000	-5676411.00000000	-3874346.25000000	-4717831.50000000	-1318327.87500000	-8501041.00000000	-3307771.00000000	-3529023.25000000	-9796846.00000000	-5191562.00000000	-5732038.00000000	-7047560.50000000	-7336638.50000000	-2294182.75000000	-11125458.00000000	-6590746.00000000	-4287710.50000000	-1016652.75000000	-8888000.00000000	-13873173.00000000	-6353775.50000000	-9296242.00000000	-6498701.50000000	-10311358.00000000	-8257228.00000000	-4538177.00000000	-4665286.00000000	-2742794.75000000	-8566461.00000000	-6573576.00000000	-4534971.50000000	-5612665.50000000	-6053578.00000000	-4775796.50000000	-5571825.00000000	-3820537.25000000	-5153253.50000000	-9047260.00000000	-5264618.00000000	-9016995.00000000	-4946077.50000000	-11992390.00000000	-19297694.00000000	-15854022.00000000	-12258575.00000000
248.32925415	-7765479.00000000	-8822681.00000000	-9188101.00000000	-5368643.50000000	-7154709.00000000	-5744739.00000000	-4143783.75000000	-4968958.50000000	-1877321.00000000	-8685223.00000000	-3147044.00000000	-3412430.25000000	-9934433.00000000	-5219316.50000000	-5985222.00000000	-7348577.50000000	-7287128.50000000	-2273427.25000000	-11076042.00000000	-6369495.00000000	-4132726.25000000	-1371602.87500000	-9339873.00000000	-14280498.00000000	-6663972.00000000	-9497453.00000000	-6409332.00000000	-10726480.00000000	-8425370.00000000	-4786685.50000000	-4099557.25000000	-3128785.00000000	-9013057.00000000	-6343247.00000000	-4732154.50000000	-5588915.50000000	-6636311.00000000	-4659280.50000000	-5755916.00000000	-4092459.00000000	-5486979.50000000	-9331784.00000000	-5591704.00000000	-8545071.00000000	-5171281.00000000	-12302430.00000000	-19253712.00000000	-15913144.00000000	-12619950.00000000
248.29740906	-8192262.00000000	-8511413.00000000	-8741448.00000000	-5328880.50000000	-7487278.00000000	-5852568.00000000	-4471626.00000000	-5264879.50000000	-2461190.25000000	-8920123.00000000	-3034631.50000000	-3324106.25000000	-9995373.00000000	-5348580.50000000	-6083824.00000000	-7460171.50000000	-7167271.50000000	-2386514.00000000	-10966640.00000000	-6081193.00000000	-4107178.75000000	-1797265.62500000	-9985229.00000000	-14611383.00000000	-6868968.00000000	-9757285.00000000	-6244898.00000000	-10993575.00000000	-8676688.00000000	-4990870.50000000	-3701014.00000000	-3725839.75000000	-9514582.00000000	-6258834.50000000	-4931822.50000000	-5592689.00000000	-7285573.50000000	-4672892.50000000	-5989831.00000000	-4364747.50000000	-5797225.00000000	-9399269.00000000	-5894183.00000000	-8217578.50000000	-5254577.50000000	-12670138.00000000	-19040020.00000000	-15922335.00000000	-12932301.00000000
248.26556396	-8483352.00000000	-8208187.00000000	-8229846.00000000	-5528194.50000000	-7527453.00000000	-6001254.00000000	-4799229.00000000	-5579220.00000000	-3045727.25000000	-9172611.00000000	-2965232.25000000	-3309123.25000000	-10001033.00000000	-5535743.00000000	-6030836.00000000	-7409961.50000000	-6914444.50000000	-2621119.75000000	-10785642.00000000	-5699472.50000000	-4253324.00000000	-2229042.50000000	-10817684.00000000	-14928441.00000000	-6891540.00000000	-10015355.00000000	-6019840.00000000	-11073529.00000000	-8980145.00000000	-5142943.50000000	-3519342.75000000	-4380670.50000000	-10008725.00000000	-6259932.00000000	-5147340.00000000	-5640256.00000000	-8058493.50000000	-4615997.00000000	-6211479.50000000	-4563958.50000000	-6053214.50000000	-9265303.00000000	-6166273.50000000	-7978021.50000000	-5268094.00000000	-13012336.00000000	-18717332.00000000	-15878765.00000000	-13268998.00000000
248.23371887	-8518674.00000000	-7972367.50000000	-7703808.50000000	-5954773.50000000	-7227821.50000000	-6159762.50000000	-5090310.50000000	-5869257.50000000	-3595618.25000000	-9358031.00000000	-2915109.50000000	-3452331.25000000	-10001107.00000000	-5709878.50000000	-5878763.50000000	-7300596.00000000	-6509538.00000000	-3014246.25000000	-10600680.00000000	-5196850.50000000	-4645294.50000000	-2595406.50000000	-11838570.00000000	-15242197.00000000	-6707178.50000000	-10250919.00000000	-5799961.50000000	-10948571.00000000	-9306547.00000000	-5196707.00000000	-3522692.00000000	-4961287.50000000	-10410975.00000000	-6299936.00000000	-5418893.00000000	-5743239.00000000	-8940789.00000000	-4367657.00000000	-6421326.00000000	-4632938.50000000	-6261781.00000000	-8952358.00000000	-6379020.50000000	-7739462.00000000	-5239467.50000000	-13293808.00000000	-18331228.00000000	-15804543.00000000	-13724516.00000000
248.20188904	-8326099.00000000	-7811713.50000000	-7198725.00000000	-6518488.00000000	-6642228.50000000	-6308838.00000000	-5352032.00000000	-6114493.00000000	-4054961.00000000	-9416284.00000000	-2878208.25000000	-3796623.25000000	-10040107.00000000	-5832703.00000000	-5702236.50000000	-7248958.50000000	-6011391.00000000	-3604079.25000000	-10512088.00000000	-4583976.00000000	-5320017.00000000	-2857181.50000000	-13006016.00000000	-15540936.00000000	-6372834.00000000	-10483612.00000000	-5676916.50000000	-10631720.00000000	-9621525.00000000	-5102712.00000000	-3638819.50000000	-5410508.00000000	-10639970.00000000	-6351950.50000000	-5783082.00000000	-5869550.00000000	-9807437.00000000	-3962300.25000000	-6681758.00000000	-4562199.00000000	-6454829.00000000	-8519973.00000000	-6509937.00000000	-7454751.50000000	-5148590.50000000	-13524020.00000000	-17901560.00000000	-15754248.00000000	-14352106.00000000
248.17005920	-8029598.50000000	-7686864.50000000	-6761060.00000000	-7132217.50000000	-5923583.50000000	-6469789.00000000	-5642674.50000000	-6333311.50000000	-4353658.00000000	-9370285.00000000	-2860774.50000000	-4305670.00000000	-10131028.00000000	-5930158.50000000	-5546699.50000000	-7314577.50000000	-5515217.50000000	-4352922.00000000	-10556740.00000000	-3910658.00000000	-6221675.00000000	-3022591.00000000	-14205947.00000000	-15850523.00000000	-6019290.50000000	-10730470.00000000	-5729533.50000000	-10172050.00000000	-9889824.00000000	-4861155.50000000	-3799133.00000000	-5738236.00000000	-10667461.00000000	-6400016.50000000	-6223683.50000000	-5947488.50000000	-10470027.00000000	-3523700.50000000	-7049258.00000000	-4402171.00000000	-6670974.00000000	-8077991.00000000	-6576478.00000000	-7147084.00000000	-4994019.00000000	-13734763.00000000	-17452098.00000000	-15790536.00000000	-15108085.00000000
248.13819885	-7747281.50000000	-7562059.50000000	-6453303.00000000	-7759998.00000000	-5255303.00000000	-6678862.50000000	-6039562.50000000	-6562788.00000000	-4436801.00000000	-9304466.00000000	-2852682.00000000	-4903949.50000000	-10254486.00000000	-6060983.50000000	-5393884.00000000	-7479459.00000000	-5077835.00000000	-5134959.50000000	-10678167.00000000	-3234540.00000000	-7215663.50000000	-3129230.75000000	-15291909.00000000	-16235531.00000000	-5792931.00000000	-10959145.00000000	-5995196.00000000	-9654968.00000000	-10090848.00000000	-4557334.00000000	-3964687.00000000	-5979575.00000000	-10549766.00000000	-6438130.00000000	-6662498.00000000	-5921530.50000000	-10782070.00000000	-3153217.75000000	-7521819.00000000	-4235179.00000000	-6931860.50000000	-7753830.00000000	-6639911.50000000	-6892910.00000000	-4845829.00000000	-13971369.00000000	-17038712.00000000	-15942227.00000000	-15859877.00000000
248.10636902	-7527406.50000000	-7448380.50000000	-6322240.00000000	-8390395.00000000	-4755346.00000000	-6941466.50000000	-6572446.00000000	-6824470.00000000	-4302246.00000000	-9289104.00000000	-2828398.75000000	-5535562.00000000	-10372650.00000000	-6254722.50000000	-5181273.50000000	-7687211.50000000	-4696754.00000000	-5810802.50000000	-10792512.00000000	-2596736.75000000	-8158236.50000000	-3208900.25000000	-16169486.00000000	-16727931.00000000	-5775998.50000000	-11098559.00000000	-6463851.00000000	-9187367.00000000	-10231426.00000000	-4337449.00000000	-4123519.25000000	-6162351.00000000	-10393291.00000000	-6479399.00000000	-7006061.50000000	-5805943.00000000	-10718209.00000000	-2889710.75000000	-8060361.00000000	-4121835.00000000	-7227137.00000000	-7633713.00000000	-6785150.50000000	-6787218.50000000	-4817470.50000000	-14290585.00000000	-16735221.00000000	-16184235.00000000	-16462112.00000000
248.07452393	-7355617.00000000	-7394471.00000000	-6363234.50000000	-8983100.00000000	-4440989.50000000	-7228955.00000000	-7176621.00000000	-7109648.50000000	-4013194.50000000	-9335338.00000000	-2785618.50000000	-6175171.00000000	-10443983.00000000	-6484472.00000000	-4865964.00000000	-7891699.00000000	-4358491.00000000	-6308376.50000000	-10860391.00000000	-2024908.25000000	-8957798.00000000	-3262854.50000000	-16848894.00000000	-17262192.00000000	-5944938.50000000	-11108639.00000000	-7092856.00000000	-8862658.00000000	-10346650.00000000	-4324077.00000000	-4266627.50000000	-6302704.50000000	-10271840.00000000	-6557643.50000000	-7203832.00000000	-5674729.00000000	-10368782.00000000	-2744485.00000000	-8642850.00000000	-4070243.00000000	-7525109.50000000	-7728760.50000000	-7097064.50000000	-6914000.50000000	-4980009.50000000	-14736345.00000000	-16585840.00000000	-16460830.00000000	-16837582.00000000
248.04269409	-7196713.00000000	-7439205.00000000	-6518307.50000000	-9465597.00000000	-4286377.00000000	-7521561.50000000	-7719547.50000000	-7393888.00000000	-3669073.00000000	-9423635.00000000	-2772306.75000000	-6799527.00000000	-10445121.00000000	-6697660.00000000	-4477054.00000000	-8071684.50000000	-4081531.25000000	-6632556.50000000	-10881993.00000000	-1547203.87500000	-9582879.00000000	-3269081.25000000	-17417826.00000000	-17691958.00000000	-6203621.00000000	-11031006.00000000	-7830654.50000000	-8723238.00000000	-10488776.00000000	-4535420.00000000	-4369156.00000000	-6418635.50000000	-10176507.00000000	-6712526.00000000	-7267719.00000000	-5592629.00000000	-9866696.00000000	-2726255.75000000	-9269515.00000000	-4057040.75000000	-7803616.50000000	-7992206.50000000	-7637859.00000000	-7319235.00000000	-5303856.00000000	-15296753.00000000	-16572308.00000000	-16728406.00000000	-16993566.00000000
248.01083374	-7020544.00000000	-7580860.00000000	-6704104.00000000	-9791788.00000000	-4295534.50000000	-7834051.00000000	-8089537.00000000	-7662202.00000000	-3360888.75000000	-9557569.00000000	-2861699.50000000	-7375722.00000000	-10403622.00000000	-6860601.50000000	-4107005.75000000	-8217506.50000000	-3894549.25000000	-6822585.50000000	-10846875.00000000	-1192859.37500000	-10028366.00000000	-3218175.75000000	-17962636.00000000	-17873960.00000000	-6464415.00000000	-10953857.00000000	-8631679.00000000	-8749674.00000000	-10704915.00000000	-4881345.50000000	-4400747.00000000	-6543449.50000000	-10051170.00000000	-6970258.50000000	-7249951.50000000	-5558533.00000000	-9313664.00000000	-2816232.00000000	-9909279.00000000	-4070801.75000000	-8073191.00000000	-8362407.50000000	-8421045.00000000	-7983850.00000000	-5680950.50000000	-15886484.00000000	-16626704.00000000	-16973612.00000000	-16968262.00000000
247.97900391	-6802661.00000000	-7792580.50000000	-6838197.50000000	-9996683.00000000	-4493548.00000000	-8181706.50000000	-8271867.00000000	-7920654.50000000	-3154471.25000000	-9772292.00000000	-3096094.75000000	-7883305.50000000	-10413121.00000000	-6964550.00000000	-3850573.25000000	-8321946.00000000	-3786443.00000000	-6928195.50000000	-10727293.00000000	-977875.18750000	-10283896.00000000	-3144734.25000000	-18509464.00000000	-17743394.00000000	-6708155.50000000	-10923576.00000000	-9453057.00000000	-8887514.00000000	-11004318.00000000	-5239607.00000000	-4357966.00000000	-6726294.50000000	-9871830.00000000	-7336847.00000000	-7211193.00000000	-5518931.50000000	-8757908.00000000	-2950045.25000000	-10466306.00000000	-4123312.25000000	-8370893.50000000	-8787186.00000000	-9394419.00000000	-8817657.00000000	-5999201.50000000	-16381601.00000000	-16674335.00000000	-17192758.00000000	-16773710.00000000
247.94717407	-6522610.50000000	-8058573.50000000	-6852204.50000000	-10181504.00000000	-4846596.50000000	-8528155.00000000	-8348702.50000000	-8184329.50000000	-3106064.50000000	-10093036.00000000	-3453490.25000000	-8327841.00000000	-10591083.00000000	-6998611.00000000	-3749201.00000000	-8384361.00000000	-3703027.00000000	-7018703.00000000	-10529440.00000000	-890500.00000000	-10331770.00000000	-3115946.25000000	-19024306.00000000	-17333494.00000000	-6979587.00000000	-10901342.00000000	-10244254.00000000	-9090719.00000000	-11330306.00000000	-5537781.50000000	-4281460.50000000	-7011543.00000000	-9680665.00000000	-7803753.00000000	-7201523.50000000	-5429618.50000000	-8221430.00000000	-3065888.25000000	-10827874.00000000	-4219553.50000000	-8733960.00000000	-9215867.00000000	-10451447.00000000	-9693323.00000000	-6202368.50000000	-16676613.00000000	-16670282.00000000	-17362508.00000000	-16396964.00000000
247.91531372	-6174035.50000000	-8385813.50000000	-6710092.00000000	-10440834.00000000	-5224685.00000000	-8789791.00000000	-8432351.00000000	-8450032.00000000	-3266370.25000000	-10502196.00000000	-3862509.50000000	-8715307.00000000	-10992678.00000000	-6941839.00000000	-3786221.25000000	-8410568.00000000	-3597169.75000000	-7173960.00000000	-10324163.00000000	-886914.06250000	-10167035.00000000	-3176786.75000000	-19450886.00000000	-16754223.00000000	-7339027.00000000	-10810889.00000000	-10951447.00000000	-9348700.00000000	-11566489.00000000	-5769467.50000000	-4230912.50000000	-7399597.00000000	-9544438.00000000	-8351869.50000000	-7251891.50000000	-5295468.50000000	-7733959.00000000	-3181464.75000000	-10953391.00000000	-4335030.00000000	-9177705.00000000	-9587284.00000000	-11467302.00000000	-10503112.00000000	-6300550.00000000	-16713160.00000000	-16611641.00000000	-17439372.00000000	-15850631.00000000
247.88348389	-5776531.50000000	-8780461.00000000	-6436820.50000000	-10804826.00000000	-5478338.50000000	-8903843.00000000	-8593697.00000000	-8675993.00000000	-3641972.75000000	-10951057.00000000	-4245478.50000000	-9018299.00000000	-11556366.00000000	-6800784.50000000	-3919936.50000000	-8402162.00000000	-3465856.75000000	-7436762.00000000	-10200878.00000000	-901108.43750000	-9816081.00000000	-3300562.75000000	-19741824.00000000	-16160059.00000000	-7821110.50000000	-10619728.00000000	-11540831.00000000	-9681256.00000000	-11594454.00000000	-5947921.00000000	-4236786.50000000	-7814932.00000000	-9496711.00000000	-8945337.00000000	-7371513.00000000	-5155003.00000000	-7334013.00000000	-3404386.25000000	-10907375.00000000	-4441499.50000000	-9689039.00000000	-9842361.00000000	-12331687.00000000	-11192601.00000000	-6346769.00000000	-16472183.00000000	-16531223.00000000	-17392936.00000000	-15206253.00000000
247.85163879	-5374879.00000000	-9219894.00000000	-6124979.50000000	-11245248.00000000	-5559236.00000000	-8885466.00000000	-8831689.00000000	-8791135.00000000	-4150783.75000000	-11386356.00000000	-4559260.00000000	-9182528.00000000	-12142566.00000000	-6651526.00000000	-4106784.50000000	-8354155.50000000	-3331622.75000000	-7782046.00000000	-10191067.00000000	-872642.75000000	-9338969.00000000	-3396379.75000000	-19865966.00000000	-15707685.00000000	-8420778.00000000	-10368690.00000000	-12018330.00000000	-10110327.00000000	-11375027.00000000	-6058548.00000000	-4278361.00000000	-8119600.00000000	-9530494.00000000	-9522993.00000000	-7555123.50000000	-5045812.00000000	-7036229.00000000	-3847489.25000000	-10801391.00000000	-4555263.00000000	-10225944.00000000	-9955690.00000000	-12962756.00000000	-11748842.00000000	-6406197.50000000	-15965713.00000000	-16479453.00000000	-17241482.00000000	-14568389.00000000
247.81980896	-5025945.00000000	-9651598.00000000	-5889377.00000000	-11721845.00000000	-5554249.50000000	-8809858.00000000	-9082200.00000000	-8737494.00000000	-4641854.50000000	-11750245.00000000	-4817787.50000000	-9169665.00000000	-12632914.00000000	-6626998.50000000	-4293985.50000000	-8274404.50000000	-3204808.75000000	-8151604.50000000	-10246920.00000000	-786198.00000000	-8817805.00000000	-3371841.75000000	-19806622.00000000	-15499035.00000000	-9085719.00000000	-10135131.00000000	-12420514.00000000	-10630035.00000000	-10989233.00000000	-6056751.00000000	-4313459.00000000	-8182722.50000000	-9632470.00000000	-10002307.00000000	-7796397.00000000	-4998644.00000000	-6803880.00000000	-4529630.50000000	-10709694.00000000	-4743872.50000000	-10718069.00000000	-9954680.00000000	-13316285.00000000	-12170947.00000000	-6524924.50000000	-15248189.00000000	-16495604.00000000	-17057572.00000000	-14020713.00000000
247.78796387	-4780827.00000000	-10016637.00000000	-5796568.50000000	-12210552.00000000	-5601911.50000000	-8743727.00000000	-9245893.00000000	-8517073.00000000	-4989792.50000000	-11968971.00000000	-5088559.50000000	-8985491.00000000	-12992893.00000000	-6847566.50000000	-4412211.50000000	-8204902.00000000	-3082543.50000000	-8511106.00000000	-10287466.00000000	-694460.68750000	-8342014.50000000	-3195231.25000000	-19565340.00000000	-15537314.00000000	-9704052.00000000	-9982101.00000000	-12782729.00000000	-11195080.00000000	-10595975.00000000	-5904608.50000000	-4331709.00000000	-7961507.50000000	-9796444.00000000	-10303068.00000000	-8089554.00000000	-5056735.00000000	-6567309.50000000	-5357151.00000000	-10644136.00000000	-5071264.00000000	-11080947.00000000	-9908253.00000000	-13402070.00000000	-12465446.00000000	-6699417.50000000	-14421492.00000000	-16578872.00000000	-16938904.00000000	-13606926.00000000
247.75611877	-4666415.00000000	-10270875.00000000	-5836718.00000000	-12689706.00000000	-5790431.50000000	-8701807.00000000	-9227952.00000000	-8200626.00000000	-5182328.50000000	-11977681.00000000	-5455085.50000000	-8667905.00000000	-13246627.00000000	-7357034.50000000	-4406230.00000000	-8212794.50000000	-2980342.75000000	-8846705.00000000	-10246515.00000000	-692683.75000000	-7997767.00000000	-2906961.75000000	-19164500.00000000	-15737223.00000000	-10117429.00000000	-9934409.00000000	-13115537.00000000	-11737871.00000000	-10332751.00000000	-5612326.50000000	-4378853.50000000	-7525653.00000000	-9990621.00000000	-10381939.00000000	-8412810.00000000	-5277928.50000000	-6283685.50000000	-6190575.50000000	-10596984.00000000	-5533743.50000000	-11254875.00000000	-9895559.00000000	-13288414.00000000	-12668192.00000000	-6864784.50000000	-13603072.00000000	-16683402.00000000	-16964948.00000000	-13358320.00000000
247.72428894	-4672148.50000000	-10388079.00000000	-5966900.50000000	-13115109.00000000	-6137112.50000000	-8659213.00000000	-8985430.00000000	-7884599.00000000	-5310835.50000000	-11781582.00000000	-5956769.00000000	-8263886.00000000	-13414110.00000000	-8120617.00000000	-4291812.50000000	-8351101.50000000	-2946640.75000000	-9103023.00000000	-10077944.00000000	-852717.37500000	-7859780.50000000	-2584527.00000000	-18638506.00000000	-15988956.00000000	-10190627.00000000	-9975953.00000000	-13408168.00000000	-12206270.00000000	-10239319.00000000	-5258320.50000000	-4530151.50000000	-7001433.50000000	-10126792.00000000	-10257747.00000000	-8717951.00000000	-5702409.50000000	-5982379.50000000	-6920346.00000000	-10587062.00000000	-6051095.50000000	-11247270.00000000	-9976205.00000000	-13068369.00000000	-12852679.00000000	-6924022.00000000	-12873997.00000000	-16748552.00000000	-17164644.00000000	-13316216.00000000
247.69242859	-4755065.50000000	-10353911.00000000	-6175401.00000000	-13422905.00000000	-6633391.00000000	-8581326.00000000	-8557992.00000000	-7631580.00000000	-5469869.50000000	-11488716.00000000	-6548190.50000000	-7827704.00000000	-13492809.00000000	-9070650.00000000	-4180804.75000000	-8624979.00000000	-3038713.75000000	-9160445.00000000	-9749059.00000000	-1172544.50000000	-7978676.50000000	-2301343.50000000	-18021644.00000000	-16223027.00000000	-9904033.00000000	-10053196.00000000	-13644512.00000000	-12593355.00000000	-10262515.00000000	-4974081.50000000	-4839731.00000000	-6486826.00000000	-10089478.00000000	-10008621.00000000	-8954570.00000000	-6317690.00000000	-5742996.50000000	-7491714.00000000	-10653192.00000000	-6516798.00000000	-11134487.00000000	-10172482.00000000	-12804239.00000000	-13095738.00000000	-6809313.00000000	-12255683.00000000	-16742644.00000000	-17507740.00000000	-13504321.00000000
247.66059875	-4868440.00000000	-10167916.00000000	-6493609.00000000	-13560361.00000000	-7266972.50000000	-8430935.00000000	-8052588.50000000	-7445709.50000000	-5664773.00000000	-11264165.00000000	-7117858.50000000	-7425736.50000000	-13493573.00000000	-10137976.00000000	-4232935.50000000	-8992858.00000000	-3289137.25000000	-8912819.00000000	-9267021.00000000	-1591648.87500000	-8362430.00000000	-2106233.00000000	-17352882.00000000	-16425295.00000000	-9383144.00000000	-10094721.00000000	-13807394.00000000	-12928492.00000000	-10325354.00000000	-4889163.50000000	-5308756.00000000	-6014011.50000000	-9815812.00000000	-9739509.00000000	-9114165.00000000	-7056584.00000000	-5620042.00000000	-7889163.00000000	-10807410.00000000	-6855661.00000000	-11005973.00000000	-10465058.00000000	-12504530.00000000	-13423973.00000000	-6531462.50000000	-11734258.00000000	-16681940.00000000	-17918894.00000000	-13876979.00000000
247.62875366	-4992547.00000000	-9854555.00000000	-6945399.00000000	-13511600.00000000	-7988691.50000000	-8168308.50000000	-7586989.50000000	-7297232.50000000	-5811405.50000000	-11238801.00000000	-7557020.00000000	-7114822.00000000	-13465762.00000000	-11236926.00000000	-4559794.00000000	-9392810.00000000	-3692014.25000000	-8375252.50000000	-8716672.00000000	-2058808.25000000	-8961862.00000000	-2020116.12500000	-16700216.00000000	-16606897.00000000	-8821113.00000000	-10054369.00000000	-13871844.00000000	-13229490.00000000	-10391159.00000000	-5055902.00000000	-5891169.50000000	-5582406.50000000	-9356672.00000000	-9539523.00000000	-9243348.00000000	-7822703.50000000	-5589975.50000000	-8120683.50000000	-11004575.00000000	-7045646.00000000	-10892656.00000000	-10804300.00000000	-12160882.00000000	-13793745.00000000	-6179841.00000000	-11300647.00000000	-16609880.00000000	-18307328.00000000	-14313567.00000000
247.59692383	-5135175.50000000	-9467723.00000000	-7494842.00000000	-13291398.00000000	-8685225.00000000	-7778253.00000000	-7236460.50000000	-7161530.00000000	-5811592.00000000	-11452807.00000000	-7821132.50000000	-6904242.50000000	-13465882.00000000	-12239384.00000000	-5152922.50000000	-9763945.00000000	-4203149.50000000	-7699395.50000000	-8244510.50000000	-2584124.75000000	-9673981.00000000	-2040941.87500000	-16175907.00000000	-16772113.00000000	-8357643.50000000	-9949220.00000000	-13809942.00000000	-13456989.00000000	-10472790.00000000	-5405846.00000000	-6522287.50000000	-5212637.00000000	-8862274.00000000	-9454670.00000000	-9402098.00000000	-8514822.00000000	-5578374.00000000	-8212334.00000000	-11165138.00000000	-7107102.50000000	-10748743.00000000	-11136721.00000000	-11805546.00000000	-14128568.00000000	-5876632.00000000	-10966887.00000000	-16558903.00000000	-18602784.00000000	-14682054.00000000
247.56509399	-5298850.50000000	-9074760.00000000	-8047062.00000000	-12916131.00000000	-9219520.00000000	-7310136.50000000	-7022011.50000000	-7034090.00000000	-5621495.50000000	-11866472.00000000	-7935990.50000000	-6751206.00000000	-13504202.00000000	-12995110.00000000	-5887750.00000000	-10050664.00000000	-4741635.00000000	-7074599.00000000	-7974198.00000000	-3223983.25000000	-10368132.00000000	-2158000.50000000	-15907841.00000000	-16914696.00000000	-8025663.50000000	-9853538.00000000	-13615228.00000000	-13518733.00000000	-10597310.00000000	-5783189.00000000	-7142608.50000000	-4958335.00000000	-8500611.00000000	-9484656.00000000	-9608682.00000000	-9043538.00000000	-5538159.50000000	-8194622.50000000	-11233013.00000000	-7083838.50000000	-10510135.00000000	-11432047.00000000	-11526370.00000000	-14382468.00000000	-5720161.00000000	-10756738.00000000	-16527368.00000000	-18786296.00000000	-14913728.00000000
247.53323364	-5454022.00000000	-8726451.00000000	-8491831.00000000	-12384371.00000000	-9513499.00000000	-6874871.00000000	-6933945.00000000	-6922087.50000000	-5261025.00000000	-12400423.00000000	-7957556.50000000	-6609496.50000000	-13536184.00000000	-13403180.00000000	-6592875.50000000	-10206392.00000000	-5205680.00000000	-6617452.00000000	-7925631.50000000	-4018082.50000000	-10926075.00000000	-2369950.50000000	-15968855.00000000	-17035748.00000000	-7801414.50000000	-9850815.00000000	-13325237.00000000	-13329818.00000000	-10770596.00000000	-6040669.00000000	-7701124.00000000	-4867531.50000000	-8367095.50000000	-9593492.00000000	-9834078.00000000	-9358579.00000000	-5494042.50000000	-8077204.50000000	-11216985.00000000	-7024344.00000000	-10175880.00000000	-11691113.00000000	-11425959.00000000	-14573997.00000000	-5745899.50000000	-10694335.00000000	-16483194.00000000	-18899102.00000000	-15017521.00000000
247.50140381	-5557007.00000000	-8436213.00000000	-8742344.00000000	-11691430.00000000	-9592204.00000000	-6579502.50000000	-6953748.50000000	-6839756.00000000	-4785487.50000000	-12961328.00000000	-7932392.50000000	-6483197.00000000	-13510360.00000000	-13475702.00000000	-7131884.00000000	-10212455.00000000	-5515348.50000000	-6347998.00000000	-8018063.50000000	-4940117.00000000	-11280685.00000000	-2685007.25000000	-16313012.00000000	-17158504.00000000	-7678069.00000000	-9986643.00000000	-13016999.00000000	-12881061.00000000	-10969587.00000000	-6124584.50000000	-8144357.00000000	-4940991.50000000	-8441221.00000000	-9722607.00000000	-10052111.00000000	-9485936.00000000	-5509593.00000000	-7837592.50000000	-11178665.00000000	-6958996.00000000	-9836102.00000000	-11931331.00000000	-11567554.00000000	-14763092.00000000	-5913627.00000000	-10802074.00000000	-16383792.00000000	-19017684.00000000	-15032464.00000000
247.46955872	-5600839.00000000	-8188964.50000000	-8750069.00000000	-10870434.00000000	-9550378.00000000	-6456852.00000000	-7052937.50000000	-6816215.50000000	-4265574.50000000	-13460257.00000000	-7887297.50000000	-6424735.00000000	-13420872.00000000	-13332003.00000000	-7451371.00000000	-10103226.00000000	-5656531.00000000	-6239813.50000000	-8152714.50000000	-5901192.50000000	-11439664.00000000	-3094733.00000000	-16777398.00000000	-17324174.00000000	-7667098.00000000	-10249333.00000000	-12777310.00000000	-12256719.00000000	-11155826.00000000	-6086053.00000000	-8414123.00000000	-5131429.00000000	-8611950.00000000	-9808874.00000000	-10285520.00000000	-9535370.00000000	-5621954.00000000	-7443947.50000000	-11175911.00000000	-6882534.00000000	-9624402.00000000	-12170297.00000000	-11947979.00000000	-14993117.00000000	-6125002.50000000	-11096947.00000000	-16197958.00000000	-19202964.00000000	-14982833.00000000
247.43771362	-5644106.50000000	-7976523.00000000	-8514655.00000000	-10021280.00000000	-9481117.00000000	-6460069.00000000	-7180741.50000000	-6892333.50000000	-3785835.50000000	-13848115.00000000	-7836263.00000000	-6478220.00000000	-13317165.00000000	-13125879.00000000	-7581849.00000000	-9971799.00000000	-5681799.50000000	-6263542.50000000	-8289452.50000000	-6791690.00000000	-11483751.00000000	-3551529.50000000	-17161528.00000000	-17568884.00000000	-7733160.00000000	-10567532.00000000	-12669549.00000000	-11586036.00000000	-11292062.00000000	-6023953.00000000	-8472412.00000000	-5378378.00000000	-8753910.00000000	-9811336.00000000	-10592802.00000000	-9645011.00000000	-5816541.00000000	-6895355.50000000	-11210779.00000000	-6762164.50000000	-9644913.00000000	-12424474.00000000	-12496776.00000000	-15248262.00000000	-6274853.50000000	-11580430.00000000	-15923888.00000000	-19458384.00000000	-14882177.00000000
247.40588379	-5781094.50000000	-7830864.50000000	-8097814.50000000	-9289506.00000000	-9428937.00000000	-6519659.00000000	-7262970.50000000	-7089693.00000000	-3436985.75000000	-14150070.00000000	-7782546.00000000	-6629356.00000000	-13278083.00000000	-12967863.00000000	-7603428.00000000	-9939788.00000000	-5665733.50000000	-6385851.50000000	-8446535.00000000	-7522584.00000000	-11534586.00000000	-3990470.25000000	-17331196.00000000	-17896240.00000000	-7761037.00000000	-10817736.00000000	-12710592.00000000	-10968215.00000000	-11352986.00000000	-6015781.00000000	-8341734.00000000	-5641846.50000000	-8807405.00000000	-9734386.00000000	-11009815.00000000	-9888568.00000000	-6053674.50000000	-6242435.50000000	-11227456.00000000	-6571598.50000000	-9932199.00000000	-12715085.00000000	-13086658.00000000	-15462428.00000000	-6317670.00000000	-12232876.00000000	-15598293.00000000	-19733344.00000000	-14760205.00000000
247.37403870	-6076262.50000000	-7821964.00000000	-7614404.00000000	-8795635.00000000	-9388836.00000000	-6594083.00000000	-7220759.50000000	-7375474.00000000	-3287222.50000000	-14448079.00000000	-7715953.00000000	-6808799.00000000	-13380995.00000000	-12900189.00000000	-7596369.50000000	-10101605.00000000	-5661298.50000000	-6555590.00000000	-8639237.00000000	-8043761.00000000	-11701366.00000000	-4386120.00000000	-17271986.00000000	-18270156.00000000	-7620694.50000000	-10865332.00000000	-12857673.00000000	-10429200.00000000	-11329647.00000000	-6080427.50000000	-8119402.50000000	-5911270.50000000	-8810337.00000000	-9626384.00000000	-11506948.00000000	-10216978.00000000	-6295027.50000000	-5571416.50000000	-11159094.00000000	-6320797.50000000	-10449892.00000000	-13059212.00000000	-13562967.00000000	-15572205.00000000	-6301619.50000000	-13018450.00000000	-15287782.00000000	-19972536.00000000	-14659941.00000000
247.34220886	-6519351.50000000	-8013028.50000000	-7179183.50000000	-8566293.00000000	-9330822.00000000	-6665996.50000000	-7002437.00000000	-7665801.50000000	-3350442.50000000	-14804010.00000000	-7620435.00000000	-6934547.50000000	-13674548.00000000	-12922998.00000000	-7598296.50000000	-10475960.00000000	-5692534.00000000	-6713339.50000000	-8835754.00000000	-8342194.50000000	-12033352.00000000	-4781417.00000000	-17061586.00000000	-18642344.00000000	-7277958.00000000	-10649674.00000000	-13013600.00000000	-9937554.00000000	-11227992.00000000	-6177957.00000000	-7933515.00000000	-6196692.50000000	-8860714.00000000	-9551397.00000000	-11997422.00000000	-10483922.00000000	-6493517.00000000	-4968997.50000000	-10976656.00000000	-6052433.00000000	-11097756.00000000	-13445644.00000000	-13803059.00000000	-15569485.00000000	-6332777.00000000	-13889439.00000000	-15060747.00000000	-20165884.00000000	-14600455.00000000
247.31034851	-7033239.50000000	-8402896.00000000	-6839310.00000000	-8528127.00000000	-9224721.00000000	-6711954.00000000	-6614490.00000000	-7874447.00000000	-3580198.25000000	-15189450.00000000	-7492874.00000000	-6948751.50000000	-14146498.00000000	-13026046.00000000	-7588427.00000000	-10999707.00000000	-5765495.50000000	-6817432.50000000	-8983553.00000000	-8431824.00000000	-12506219.00000000	-5243649.50000000	-16799230.00000000	-18994974.00000000	-6838211.50000000	-10255338.00000000	-13068086.00000000	-9458424.00000000	-11064509.00000000	-6234666.50000000	-7862401.00000000	-6514900.50000000	-9041293.00000000	-9556896.00000000	-12377278.00000000	-10535457.00000000	-6576636.50000000	-4495278.50000000	-10695858.00000000	-5810233.50000000	-11720456.00000000	-13821362.00000000	-13777646.00000000	-15509913.00000000	-6491537.00000000	-14781170.00000000	-14955597.00000000	-20350618.00000000	-14554749.00000000
247.27851868	-7520865.50000000	-8900950.00000000	-6553667.00000000	-8573090.00000000	-9056004.00000000	-6701059.00000000	-6131789.00000000	-7962874.00000000	-3896924.50000000	-15496223.00000000	-7354651.00000000	-6830209.50000000	-14700972.00000000	-13192118.00000000	-7508362.00000000	-11574111.00000000	-5864505.50000000	-6862520.00000000	-9078435.00000000	-8342843.00000000	-13048217.00000000	-5784048.50000000	-16557427.00000000	-19353652.00000000	-6478246.00000000	-9885876.00000000	-12969246.00000000	-8998590.00000000	-10864350.00000000	-6186261.00000000	-7885158.00000000	-6870670.50000000	-9366177.00000000	-9659080.00000000	-12559251.00000000	-10298878.00000000	-6472863.00000000	-4174055.25000000	-10348992.00000000	-5609679.50000000	-12148793.00000000	-14109071.00000000	-13559219.00000000	-15472919.00000000	-6772882.50000000	-15610573.00000000	-14969782.00000000	-20567122.00000000	-14478447.00000000
247.24667358	-7917736.00000000	-9357154.00000000	-6241901.00000000	-8635924.00000000	-8832184.00000000	-6627956.00000000	-5670176.00000000	-7944110.00000000	-4228828.50000000	-15623789.00000000	-7243188.00000000	-6596463.00000000	-15181834.00000000	-13385469.00000000	-7307351.00000000	-12130846.00000000	-5941900.50000000	-6885969.50000000	-9198093.00000000	-8114126.50000000	-13585554.00000000	-6324961.50000000	-16383370.00000000	-19750510.00000000	-6334138.00000000	-9736598.00000000	-12775725.00000000	-8610114.00000000	-10661311.00000000	-6023145.50000000	-7909623.00000000	-7234380.00000000	-9784531.00000000	-9842198.00000000	-12488368.00000000	-9817288.00000000	-6172686.50000000	-3992393.50000000	-9965167.00000000	-5431310.50000000	-12282554.00000000	-14242827.00000000	-13262369.00000000	-15510549.00000000	-7100556.00000000	-16296156.00000000	-15079963.00000000	-20818634.00000000	-14361539.00000000
247.21482849	-8223882.50000000	-9628238.00000000	-5859045.00000000	-8716223.00000000	-8581538.00000000	-6533943.50000000	-5330521.50000000	-7844529.50000000	-4536677.50000000	-15562972.00000000	-7192111.50000000	-6306219.50000000	-15448317.00000000	-13558995.00000000	-6982709.50000000	-12660447.00000000	-5936866.50000000	-6963478.00000000	-9452810.00000000	-7789424.00000000	-14079663.00000000	-6751975.00000000	-16320898.00000000	-20174784.00000000	-6444422.00000000	-9873955.00000000	-12634548.00000000	-8357438.50000000	-10489198.00000000	-5805230.50000000	-7850671.50000000	-7537080.50000000	-10221728.00000000	-10058217.00000000	-12151384.00000000	-9219187.00000000	-5757449.50000000	-3904226.25000000	-9582440.00000000	-5232811.00000000	-12159701.00000000	-14190787.00000000	-12970543.00000000	-15625437.00000000	-7392616.00000000	-16788402.00000000	-15274885.00000000	-21073098.00000000	-14246901.00000000
247.18299866	-8500496.00000000	-9636341.00000000	-5432506.50000000	-8840254.00000000	-8347911.50000000	-6484734.50000000	-5155173.50000000	-7672910.50000000	-4804424.50000000	-15403493.00000000	-7218132.50000000	-6051242.00000000	-15451557.00000000	-13685897.00000000	-6588000.00000000	-13175197.00000000	-5821751.50000000	-7181875.50000000	-9888435.00000000	-7414539.50000000	-14541693.00000000	-6999496.00000000	-16410745.00000000	-20567280.00000000	-6775169.00000000	-10229638.00000000	-12689137.00000000	-8280825.00000000	-10362180.00000000	-5627117.00000000	-7684702.00000000	-7705162.00000000	-10612777.00000000	-10232106.00000000	-11585030.00000000	-8647960.00000000	-5351164.50000000	-3844474.25000000	-9264968.00000000	-4969274.00000000	-11938029.00000000	-13956257.00000000	-12713869.00000000	-15783603.00000000	-7613357.50000000	-17077292.00000000	-15571265.00000000	-21289460.00000000	-14197541.00000000
247.15115356	-8825489.00000000	-9388076.00000000	-5041219.50000000	-9019839.00000000	-8182696.50000000	-6529410.50000000	-5132373.50000000	-7432481.00000000	-5004959.50000000	-15268698.00000000	-7321035.50000000	-5927873.00000000	-15248605.00000000	-13781702.00000000	-6202094.50000000	-13645693.00000000	-5625497.00000000	-7586359.00000000	-10427957.00000000	-7032455.50000000	-15020871.00000000	-7091474.00000000	-16664129.00000000	-20865950.00000000	-7273765.50000000	-10699655.00000000	-12989158.00000000	-8383012.50000000	-10264180.00000000	-5560732.50000000	-7440615.50000000	-7719579.50000000	-10906935.00000000	-10291343.00000000	-10871785.00000000	-8191732.50000000	-5031816.50000000	-3758302.75000000	-9088161.00000000	-4617859.50000000	-11789159.00000000	-13576489.00000000	-12499667.00000000	-15936210.00000000	-7777155.00000000	-17167692.00000000	-15997507.00000000	-21425274.00000000	-14249192.00000000
247.11932373	-9227097.00000000	-8954621.00000000	-4766377.00000000	-9253911.00000000	-8128204.50000000	-6681890.50000000	-5235447.00000000	-7156959.50000000	-5076470.50000000	-15239040.00000000	-7489874.50000000	-6001495.50000000	-14946727.00000000	-13884969.00000000	-5877423.50000000	-13986030.00000000	-5400653.00000000	-8140378.50000000	-10905102.00000000	-6678240.00000000	-15567219.00000000	-7112905.50000000	-17042682.00000000	-21050736.00000000	-7892956.50000000	-11236838.00000000	-13472757.00000000	-8636262.00000000	-10169611.00000000	-5626236.50000000	-7158745.00000000	-7646452.50000000	-11062377.00000000	-10214573.00000000	-10115185.00000000	-7853483.00000000	-4782210.50000000	-3631606.00000000	-9097606.00000000	-4200198.50000000	-11795230.00000000	-13131633.00000000	-12340077.00000000	-16029346.00000000	-7926078.50000000	-17055836.00000000	-16558912.00000000	-21422590.00000000	-14390951.00000000
247.08746338	-9644463.00000000	-8437188.00000000	-4651756.00000000	-9552615.00000000	-8191120.50000000	-6930602.50000000	-5446012.00000000	-6921681.00000000	-4944404.50000000	-15319500.00000000	-7709843.50000000	-6288348.00000000	-14634263.00000000	-14011631.00000000	-5600768.00000000	-14116008.00000000	-5167254.00000000	-8744798.00000000	-11158898.00000000	-6378264.50000000	-16181941.00000000	-7152270.00000000	-17471380.00000000	-21142916.00000000	-8581632.00000000	-11856621.00000000	-14022769.00000000	-8988968.00000000	-10081224.00000000	-5808183.00000000	-6871933.00000000	-7601115.50000000	-11055909.00000000	-10058082.00000000	-9405713.00000000	-7577968.00000000	-4519216.50000000	-3496560.00000000	-9286260.00000000	-3784661.75000000	-11935075.00000000	-12742924.00000000	-12240805.00000000	-16008836.00000000	-8114450.00000000	-16741530.00000000	-17214312.00000000	-21217142.00000000	-14579965.00000000
247.05563354	-9957214.00000000	-7940221.00000000	-4690245.00000000	-9933781.00000000	-8324823.00000000	-7250287.00000000	-5736559.50000000	-6809612.00000000	-4584774.50000000	-15458396.00000000	-7968942.50000000	-6760636.50000000	-14353834.00000000	-14132317.00000000	-5296720.50000000	-14041158.00000000	-4895599.50000000	-9307160.00000000	-11110587.00000000	-6152220.50000000	-16788918.00000000	-7261747.50000000	-17873172.00000000	-21171258.00000000	-9276155.00000000	-12582194.00000000	-14538701.00000000	-9363985.00000000	-10036246.00000000	-6082420.00000000	-6617950.00000000	-7671927.50000000	-10904883.00000000	-9926174.00000000	-8798317.00000000	-7312076.00000000	-4165814.25000000	-3402505.25000000	-9613153.00000000	-3456911.00000000	-12150656.00000000	-12531558.00000000	-12176352.00000000	-15835698.00000000	-8397402.00000000	-16265004.00000000	-17882234.00000000	-20794538.00000000	-14768618.00000000
247.02378845	-10068785.00000000	-7557761.50000000	-4837155.00000000	-10386529.00000000	-8446215.00000000	-7606353.50000000	-6046695.00000000	-6862745.50000000	-4077216.50000000	-15590884.00000000	-8261231.00000000	-7359723.00000000	-14120966.00000000	-14202621.00000000	-4879252.50000000	-13862478.00000000	-4542903.50000000	-9791899.00000000	-10776987.00000000	-6012018.00000000	-17260978.00000000	-7448108.50000000	-18195568.00000000	-21148532.00000000	-9912685.00000000	-13399670.00000000	-14973363.00000000	-9665833.00000000	-10056843.00000000	-6418202.50000000	-6447189.00000000	-7871624.00000000	-10673421.00000000	-9904487.00000000	-8316142.50000000	-7048736.00000000	-3701723.75000000	-3376645.00000000	-10035432.00000000	-3275311.75000000	-12407279.00000000	-12550282.00000000	-12094944.00000000	-15508003.00000000	-8801320.00000000	-15720837.00000000	-18472922.00000000	-20244832.00000000	-14929304.00000000
246.99195862	-9971478.00000000	-7363467.50000000	-5043173.00000000	-10851103.00000000	-8482866.00000000	-7967882.00000000	-6299168.00000000	-7063188.50000000	-3593321.75000000	-15675518.00000000	-8579159.00000000	-8003660.00000000	-13949481.00000000	-14218151.00000000	-4322788.00000000	-13698749.00000000	-4099982.75000000	-10204496.00000000	-10240993.00000000	-5956776.00000000	-17492498.00000000	-7684663.00000000	-18415622.00000000	-21070284.00000000	-10449064.00000000	-14247516.00000000	-15329400.00000000	-9813491.00000000	-10091271.00000000	-6766024.00000000	-6401703.00000000	-8153518.00000000	-10445706.00000000	-10013471.00000000	-7977569.00000000	-6822030.50000000	-3163007.75000000	-3413503.25000000	-10513261.00000000	-3245321.25000000	-12690352.00000000	-12742754.00000000	-11952664.00000000	-15066884.00000000	-9283765.00000000	-15226471.00000000	-18927006.00000000	-19739812.00000000	-15072735.00000000
246.96011353	-9734666.00000000	-7394715.50000000	-5286456.00000000	-11252436.00000000	-8410117.00000000	-8331674.00000000	-6448007.00000000	-7354294.50000000	-3319634.75000000	-15708114.00000000	-8897468.00000000	-8594813.00000000	-13855522.00000000	-14235873.00000000	-3703134.50000000	-13599310.00000000	-3605063.75000000	-10543121.00000000	-9620593.00000000	-5972304.00000000	-17461826.00000000	-7936216.50000000	-18535128.00000000	-20916372.00000000	-10876665.00000000	-15017574.00000000	-15636882.00000000	-9783212.00000000	-10021386.00000000	-7067007.00000000	-6487152.50000000	-8462167.00000000	-10280931.00000000	-10215191.00000000	-7825531.50000000	-6667640.50000000	-2609128.25000000	-3504035.25000000	-10991140.00000000	-3329133.75000000	-12968579.00000000	-12974117.00000000	-11736823.00000000	-14576252.00000000	-9726434.00000000	-14875172.00000000	-19242604.00000000	-19427886.00000000	-15251864.00000000
246.92826843	-9434619.00000000	-7634040.50000000	-5574515.50000000	-11556777.00000000	-8245607.50000000	-8724876.00000000	-6504227.50000000	-7674920.50000000	-3371763.25000000	-15712465.00000000	-9167049.00000000	-9040278.00000000	-13846010.00000000	-14336474.00000000	-3174291.00000000	-13533425.00000000	-3124982.00000000	-10784353.00000000	-9043310.00000000	-6038926.50000000	-17230324.00000000	-8186687.50000000	-18577866.00000000	-20651800.00000000	-11217576.00000000	-15565144.00000000	-15925415.00000000	-9622612.00000000	-9749474.00000000	-7287408.50000000	-6669749.00000000	-8763531.00000000	-10185575.00000000	-10450867.00000000	-7927346.50000000	-6590461.50000000	-2094010.00000000	-3671006.50000000	-11395825.00000000	-3474648.75000000	-13187713.00000000	-13112574.00000000	-11457491.00000000	-14093789.00000000	-9988855.00000000	-14717185.00000000	-19478190.00000000	-19337086.00000000	-15537213.00000000
246.89643860	-9102728.00000000	-8004978.50000000	-5909689.00000000	-11789152.00000000	-8018861.00000000	-9162897.00000000	-6511428.50000000	-7978963.50000000	-3756912.25000000	-15719144.00000000	-9334994.00000000	-9283781.00000000	-13911185.00000000	-14561486.00000000	-2892235.50000000	-13455528.00000000	-2728468.00000000	-10913910.00000000	-8608194.00000000	-6138092.00000000	-16886858.00000000	-8447363.00000000	-18583500.00000000	-20250746.00000000	-11513612.00000000	-15756961.00000000	-16200045.00000000	-9415786.00000000	-9284458.00000000	-7440421.00000000	-6895915.00000000	-9039484.00000000	-10125147.00000000	-10665907.00000000	-8329654.50000000	-6563719.50000000	-1661026.25000000	-3966908.75000000	-11669184.00000000	-3640135.75000000	-13307534.00000000	-13096085.00000000	-11129473.00000000	-13659129.00000000	-9991539.00000000	-14773830.00000000	-19725130.00000000	-19377000.00000000	-15968663.00000000
246.86457825	-8742295.00000000	-8398798.00000000	-6254614.00000000	-11997050.00000000	-7761098.50000000	-9597463.00000000	-6507206.50000000	-8239103.50000000	-4392356.50000000	-15745381.00000000	-9380055.00000000	-9328063.00000000	-14028404.00000000	-14881661.00000000	-2936304.50000000	-13365525.00000000	-2463092.25000000	-10950572.00000000	-8343334.50000000	-6247394.00000000	-16497615.00000000	-8731894.00000000	-18589828.00000000	-19743698.00000000	-11811150.00000000	-15551559.00000000	-16439762.00000000	-9225621.00000000	-8738863.00000000	-7567554.50000000	-7106463.00000000	-9276392.00000000	-10063789.00000000	-10809820.00000000	-8997375.00000000	-6550254.00000000	-1355786.12500000	-4431591.00000000	-11803217.00000000	-3809095.25000000	-13334369.00000000	-12938172.00000000	-10774215.00000000	-13305127.00000000	-9764940.00000000	-15050662.00000000	-20055752.00000000	-19430860.00000000	-16517095.00000000
246.83274841	-8384263.00000000	-8727399.00000000	-6543294.50000000	-12206606.00000000	-7526490.00000000	-9920012.00000000	-6517900.00000000	-8447484.00000000	-5148308.00000000	-15785493.00000000	-9329468.00000000	-9228014.00000000	-14169241.00000000	-15217469.00000000	-3277900.25000000	-13300737.00000000	-2336269.25000000	-10928620.00000000	-8201470.50000000	-6331476.50000000	-16102158.00000000	-9019580.00000000	-18609682.00000000	-19234228.00000000	-12142608.00000000	-15043899.00000000	-16630683.00000000	-9061425.00000000	-8239458.00000000	-7700408.50000000	-7236733.50000000	-9469653.00000000	-9995944.00000000	-10832571.00000000	-9798012.00000000	-6525368.00000000	-1232843.75000000	-5053065.00000000	-11835894.00000000	-3999780.50000000	-13310430.00000000	-12689201.00000000	-10435198.00000000	-13075048.00000000	-9432335.00000000	-15526552.00000000	-20474568.00000000	-19443202.00000000	-17089876.00000000
246.80091858	-8109457.50000000	-8969202.00000000	-6732741.50000000	-12416529.00000000	-7402937.50000000	-10032655.00000000	-6579977.50000000	-8615663.00000000	-5890130.00000000	-15817032.00000000	-9235501.00000000	-9056405.00000000	-14301894.00000000	-15483859.00000000	-3806768.00000000	-13281578.00000000	-2309488.75000000	-10868215.00000000	-8114076.50000000	-6347392.50000000	-15734743.00000000	-9250277.00000000	-18621078.00000000	-18840858.00000000	-12511438.00000000	-14415216.00000000	-16805354.00000000	-8893448.00000000	-7842922.50000000	-7843267.00000000	-7224790.50000000	-9628797.00000000	-9943375.00000000	-10697117.00000000	-10563011.00000000	-6491347.00000000	-1336446.25000000	-5771684.00000000	-11812405.00000000	-4260606.00000000	-13275996.00000000	-12400209.00000000	-10176228.00000000	-13024110.00000000	-9151876.00000000	-16134382.00000000	-20908158.00000000	-19430094.00000000	-17577446.00000000
246.76907349	-8004693.00000000	-9170083.00000000	-6835954.50000000	-12618782.00000000	-7476479.00000000	-9917279.00000000	-6740770.50000000	-8766405.00000000	-6516527.00000000	-15823382.00000000	-9130068.00000000	-8868295.00000000	-14390178.00000000	-15620125.00000000	-4385732.50000000	-13281662.00000000	-2316493.25000000	-10776485.00000000	-8061024.50000000	-6265890.00000000	-15426669.00000000	-9364589.00000000	-18579392.00000000	-18605576.00000000	-12892217.00000000	-13823081.00000000	-17034882.00000000	-8693774.00000000	-7531944.50000000	-7984420.00000000	-7042258.50000000	-9761649.00000000	-9925249.00000000	-10403399.00000000	-11180967.00000000	-6480509.50000000	-1662046.12500000	-6518250.50000000	-11755582.00000000	-4637184.50000000	-13248068.00000000	-12111820.00000000	-10051096.00000000	-13198124.00000000	-9063643.00000000	-16766003.00000000	-21247388.00000000	-19433018.00000000	-17905662.00000000
246.73722839	-8092455.00000000	-9393674.00000000	-6891664.00000000	-12808279.00000000	-7772733.50000000	-9629765.00000000	-7022227.50000000	-8920294.00000000	-6988368.50000000	-15818815.00000000	-8999680.00000000	-8689962.00000000	-14396632.00000000	-15592903.00000000	-4897369.00000000	-13253452.00000000	-2295153.75000000	-10667653.00000000	-8089196.50000000	-6084149.50000000	-15184930.00000000	-9350422.00000000	-18442086.00000000	-18467910.00000000	-13249286.00000000	-13332228.00000000	-17361424.00000000	-8467060.00000000	-7274556.50000000	-8109049.50000000	-6725049.00000000	-9851885.00000000	-9935165.00000000	-10006179.00000000	-11636972.00000000	-6539101.00000000	-2134686.50000000	-7242349.00000000	-11671778.00000000	-5122748.50000000	-13231519.00000000	-11851122.00000000	-10069102.00000000	-13597695.00000000	-9259894.00000000	-17309464.00000000	-21411002.00000000	-19484972.00000000	-18059190.00000000
246.70538330	-8300719.50000000	-9661697.00000000	-6900477.00000000	-12975697.00000000	-8234894.50000000	-9232997.00000000	-7388154.00000000	-9092910.00000000	-7326848.50000000	-15848969.00000000	-8803180.00000000	-8533080.00000000	-14296047.00000000	-15388563.00000000	-5268055.00000000	-13173307.00000000	-2209972.25000000	-10557470.00000000	-8266258.50000000	-5810751.50000000	-14985946.00000000	-9247748.00000000	-18190054.00000000	-18341856.00000000	-13561534.00000000	-12938021.00000000	-17732682.00000000	-8253541.00000000	-7073528.50000000	-8196783.50000000	-6368831.50000000	-9864480.00000000	-9949782.00000000	-9613411.00000000	-11965922.00000000	-6691226.50000000	-2637803.50000000	-7908708.00000000	-11571737.00000000	-5635820.00000000	-13241613.00000000	-11618974.00000000	-10188337.00000000	-14150353.00000000	-9767771.00000000	-17693524.00000000	-21380230.00000000	-19614984.00000000	-18072070.00000000
246.67355347	-8499773.00000000	-9937473.00000000	-6801042.50000000	-13113503.00000000	-8761762.00000000	-8754720.00000000	-7756852.50000000	-9305388.00000000	-7572181.00000000	-15948693.00000000	-8511588.00000000	-8410023.00000000	-14095906.00000000	-15010761.00000000	-5476134.00000000	-13054626.00000000	-2060220.37500000	-10428646.00000000	-8619861.00000000	-5440046.00000000	-14805007.00000000	-9110078.00000000	-17838666.00000000	-18217126.00000000	-13833590.00000000	-12629523.00000000	-18017182.00000000	-8109245.00000000	-6965254.50000000	-8219150.00000000	-6086036.00000000	-9781658.00000000	-9957891.00000000	-9357114.00000000	-12181171.00000000	-6905905.00000000	-3081142.25000000	-8484944.00000000	-11471920.00000000	-6057615.50000000	-13312323.00000000	-11380946.00000000	-10343351.00000000	-14716565.00000000	-10537236.00000000	-17907748.00000000	-21185710.00000000	-19855702.00000000	-18000674.00000000
246.64169312	-8573995.00000000	-10165154.00000000	-6515406.50000000	-13243241.00000000	-9266923.00000000	-8219687.50000000	-8047847.00000000	-9585731.00000000	-7733252.00000000	-16084608.00000000	-8129812.00000000	-8330361.00000000	-13847281.00000000	-14484714.00000000	-5550952.00000000	-12923050.00000000	-1889283.25000000	-10219237.00000000	-9114523.00000000	-4952842.00000000	-14649449.00000000	-8967970.00000000	-17436602.00000000	-18174614.00000000	-14083727.00000000	-12409509.00000000	-18099600.00000000	-8076528.00000000	-6988918.00000000	-8156171.50000000	-5955773.00000000	-9628481.00000000	-9975849.00000000	-9338231.00000000	-12259419.00000000	-7100148.00000000	-3451803.25000000	-8950042.00000000	-11374970.00000000	-6306925.50000000	-13484449.00000000	-11088253.00000000	-10486282.00000000	-15142422.00000000	-11447852.00000000	-17987606.00000000	-20873096.00000000	-20223146.00000000	-17893678.00000000
246.60986328	-8475166.00000000	-10323115.00000000	-6014699.50000000	-13426093.00000000	-9707748.00000000	-7706541.00000000	-8219108.00000000	-9942322.00000000	-7775531.50000000	-16146593.00000000	-7684274.50000000	-8287630.00000000	-13627840.00000000	-13861691.00000000	-5557839.50000000	-12788354.00000000	-1793828.75000000	-9866463.00000000	-9667432.00000000	-4352649.00000000	-14550772.00000000	-8829600.00000000	-17052674.00000000	-18304908.00000000	-14317229.00000000	-12262536.00000000	-17967026.00000000	-8158489.50000000	-7158987.50000000	-8019820.00000000	-5996952.00000000	-9456869.00000000	-10031759.00000000	-9569519.00000000	-12185883.00000000	-7183506.00000000	-3800914.25000000	-9312396.00000000	-11259311.00000000	-6391450.00000000	-13781891.00000000	-10723348.00000000	-10612024.00000000	-15334814.00000000	-12348192.00000000	-17979982.00000000	-20485936.00000000	-20691388.00000000	-17767530.00000000
246.57803345	-8229889.50000000	-10438178.00000000	-5339815.00000000	-13720654.00000000	-10075532.00000000	-7342925.00000000	-8275285.50000000	-10330616.00000000	-7659776.50000000	-16022593.00000000	-7198567.00000000	-8261066.50000000	-13500837.00000000	-13218039.00000000	-5562860.00000000	-12640960.00000000	-1902860.75000000	-9365137.00000000	-10176099.00000000	-3701365.50000000	-14521097.00000000	-8705116.00000000	-16753518.00000000	-18621958.00000000	-14507443.00000000	-12136047.00000000	-17702822.00000000	-8313260.50000000	-7446350.50000000	-7854216.00000000	-6170156.00000000	-9308531.00000000	-10136319.00000000	-9959228.00000000	-11987381.00000000	-7109360.00000000	-4180173.75000000	-9599984.00000000	-11097584.00000000	-6396945.50000000	-14188320.00000000	-10330005.00000000	-10750044.00000000	-15308243.00000000	-13115292.00000000	-17916834.00000000	-20071446.00000000	-21204224.00000000	-17597318.00000000
246.54618835	-7912361.00000000	-10551348.00000000	-4571771.50000000	-14115625.00000000	-10374989.00000000	-7225231.50000000	-8260910.50000000	-10658841.00000000	-7395017.00000000	-15703026.00000000	-6689044.50000000	-8235342.50000000	-13481223.00000000	-12641031.00000000	-5589471.50000000	-12469495.00000000	-2312704.75000000	-8775678.00000000	-10548460.00000000	-3113491.50000000	-14525840.00000000	-8617333.00000000	-16582738.00000000	-19056944.00000000	-14603088.00000000	-11979888.00000000	-17401556.00000000	-8478024.00000000	-7765922.50000000	-7704061.50000000	-6400909.50000000	-9201461.00000000	-10271421.00000000	-10357251.00000000	-11705314.00000000	-6893279.00000000	-4592436.50000000	-9817457.00000000	-10888222.00000000	-6432157.00000000	-14641421.00000000	-9997214.00000000	-10928220.00000000	-15165605.00000000	-13698681.00000000	-17815032.00000000	-19687010.00000000	-21720330.00000000	-17332668.00000000
246.51435852	-7611507.50000000	-10675386.00000000	-3799668.75000000	-14507221.00000000	-10615501.00000000	-7340159.50000000	-8246600.00000000	-10844201.00000000	-7061475.00000000	-15309831.00000000	-6185192.00000000	-8210793.00000000	-13539910.00000000	-12195362.00000000	-5598127.50000000	-12281949.00000000	-3021387.25000000	-8177729.50000000	-10740741.00000000	-2711255.25000000	-14506684.00000000	-8588361.00000000	-16553932.00000000	-19523026.00000000	-14560692.00000000	-11808499.00000000	-17096618.00000000	-8610401.00000000	-7991549.50000000	-7578043.00000000	-6617765.00000000	-9147594.00000000	-10405470.00000000	-10631503.00000000	-11347556.00000000	-6593855.00000000	-5003582.50000000	-9918923.00000000	-10668280.00000000	-6577108.50000000	-15059324.00000000	-9812092.00000000	-11138153.00000000	-15029165.00000000	-14120669.00000000	-17696174.00000000	-19395080.00000000	-22240486.00000000	-16935122.00000000
246.48249817	-7409680.50000000	-10786133.00000000	-3117068.00000000	-14752591.00000000	-10812549.00000000	-7565209.00000000	-8297286.50000000	-10870348.00000000	-6792253.50000000	-15004746.00000000	-5747542.50000000	-8184481.00000000	-13638827.00000000	-11884513.00000000	-5514603.00000000	-12119632.00000000	-3924303.00000000	-7629967.50000000	-10784421.00000000	-2579114.00000000	-14428021.00000000	-8626591.00000000	-16657990.00000000	-19977152.00000000	-14378632.00000000	-11714327.00000000	-16764446.00000000	-8714259.00000000	-8018950.50000000	-7439311.00000000	-6790067.50000000	-9165345.00000000	-10514814.00000000	-10714763.00000000	-10889862.00000000	-6283087.00000000	-5397776.50000000	-9844376.00000000	-10493615.00000000	-6861655.50000000	-15390143.00000000	-9823418.00000000	-11334034.00000000	-14977570.00000000	-14434893.00000000	-17598586.00000000	-19255414.00000000	-22782318.00000000	-16416614.00000000
246.45066833	-7369701.50000000	-10845869.00000000	-2626068.75000000	-14752253.00000000	-10990752.00000000	-7744439.50000000	-8429170.00000000	-10788053.00000000	-6730555.00000000	-14856848.00000000	-5455045.50000000	-8126430.50000000	-13756150.00000000	-11645598.00000000	-5297678.00000000	-12055734.00000000	-4875105.50000000	-7178397.00000000	-10764614.00000000	-2746031.00000000	-14294514.00000000	-8736620.00000000	-16877164.00000000	-20428294.00000000	-14104591.00000000	-11808885.00000000	-16380796.00000000	-8828109.00000000	-7845768.50000000	-7230295.00000000	-6937319.50000000	-9262144.00000000	-10588988.00000000	-10599274.00000000	-10331085.00000000	-6026918.00000000	-5814422.00000000	-9599021.00000000	-10400152.00000000	-7268192.00000000	-15646815.00000000	-10034916.00000000	-11467687.00000000	-15031771.00000000	-14672085.00000000	-17561776.00000000	-19319066.00000000	-23333700.00000000	-15855662.00000000
246.41882324	-7519559.00000000	-10825466.00000000	-2418904.25000000	-14490610.00000000	-11184314.00000000	-7774080.50000000	-8596168.00000000	-10661899.00000000	-6977792.50000000	-14798260.00000000	-5364431.50000000	-7993017.50000000	-13877679.00000000	-11404860.00000000	-4999188.50000000	-12165861.00000000	-5748113.00000000	-6883200.50000000	-10748448.00000000	-3188423.50000000	-14124981.00000000	-8938472.00000000	-17200580.00000000	-20900560.00000000	-13808441.00000000	-12140444.00000000	-15960384.00000000	-8988714.00000000	-7593907.00000000	-6913591.00000000	-7097321.00000000	-9409736.00000000	-10620543.00000000	-10312430.00000000	-9734379.00000000	-5871876.50000000	-6327162.00000000	-9293529.00000000	-10373793.00000000	-7744036.00000000	-15893025.00000000	-10411516.00000000	-11523632.00000000	-15182724.00000000	-14806572.00000000	-17596174.00000000	-19610298.00000000	-23843024.00000000	-15380406.00000000
246.38697815	-7835347.00000000	-10705328.00000000	-2546886.50000000	-14016914.00000000	-11427201.00000000	-7647188.00000000	-8731449.00000000	-10524850.00000000	-7542187.50000000	-14709441.00000000	-5474314.50000000	-7776420.50000000	-13979212.00000000	-11160647.00000000	-4765167.00000000	-12472688.00000000	-6452062.00000000	-6807722.50000000	-10723799.00000000	-3837545.00000000	-13918534.00000000	-9262758.00000000	-17638200.00000000	-21387892.00000000	-13541311.00000000	-12656323.00000000	-15548453.00000000	-9203066.00000000	-7434651.00000000	-6503644.50000000	-7282284.50000000	-9548254.00000000	-10597982.00000000	-9910796.00000000	-9204798.00000000	-5829388.00000000	-6983412.50000000	-9088334.00000000	-10351386.00000000	-8220128.00000000	-16189660.00000000	-10884232.00000000	-11516618.00000000	-15420927.00000000	-14762404.00000000	-17673174.00000000	-20094126.00000000	-24259188.00000000	-15123284.00000000
246.35514832	-8237537.00000000	-10470282.00000000	-3009013.00000000	-13409286.00000000	-11725437.00000000	-7451729.50000000	-8805257.00000000	-10385085.00000000	-8310942.50000000	-14542284.00000000	-5726210.00000000	-7533883.50000000	-14039147.00000000	-11012917.00000000	-4767465.00000000	-12902532.00000000	-6920226.50000000	-6964986.50000000	-10610746.00000000	-4595314.00000000	-13654498.00000000	-9711791.00000000	-18220890.00000000	-21834612.00000000	-13311616.00000000	-13234957.00000000	-15189897.00000000	-9445458.00000000	-7469953.00000000	-6070458.00000000	-7470037.00000000	-9615910.00000000	-10515209.00000000	-9481265.00000000	-8833402.00000000	-5866614.50000000	-7758716.50000000	-9078539.00000000	-10258503.00000000	-8635864.00000000	-16546851.00000000	-11364758.00000000	-11458218.00000000	-15739193.00000000	-14455709.00000000	-17750370.00000000	-20664048.00000000	-24571174.00000000	-15165171.00000000
246.32330322	-8613368.00000000	-10120493.00000000	-3762999.50000000	-12761432.00000000	-12026996.00000000	-7331498.50000000	-8831988.00000000	-10262065.00000000	-9076757.00000000	-14358564.00000000	-6044095.50000000	-7353595.00000000	-14074824.00000000	-11092517.00000000	-5108813.50000000	-13304807.00000000	-7129327.00000000	-7277394.50000000	-10335276.00000000	-5371020.00000000	-13327222.00000000	-10219945.00000000	-18968176.00000000	-22159370.00000000	-13091547.00000000	-13757366.00000000	-14911412.00000000	-9668457.00000000	-7672111.00000000	-5710999.50000000	-7637450.00000000	-9570010.00000000	-10391549.00000000	-9114338.00000000	-8669537.00000000	-5919918.50000000	-8564127.00000000	-9220500.00000000	-10064199.00000000	-8960913.00000000	-16915650.00000000	-11784456.00000000	-11337886.00000000	-16113592.00000000	-13850424.00000000	-17804832.00000000	-21187914.00000000	-24798906.00000000	-15496337.00000000
246.29147339	-8859075.00000000	-9690914.00000000	-4727462.00000000	-12183733.00000000	-12227657.00000000	-7414195.00000000	-8819417.00000000	-10199155.00000000	-9620176.00000000	-14261302.00000000	-6381239.50000000	-7288663.00000000	-14150477.00000000	-11445650.00000000	-5764025.50000000	-13539222.00000000	-7139896.50000000	-7598241.00000000	-9892119.00000000	-6124700.50000000	-12980575.00000000	-10661445.00000000	-19832010.00000000	-22311502.00000000	-12845448.00000000	-14163391.00000000	-14719930.00000000	-9814237.00000000	-7930185.00000000	-5503586.50000000	-7790218.50000000	-9388155.00000000	-10282929.00000000	-8854987.00000000	-8731519.00000000	-5928111.00000000	-9297519.00000000	-9367039.00000000	-9813613.00000000	-9201821.00000000	-17213426.00000000	-12134074.00000000	-11144321.00000000	-16486028.00000000	-12996503.00000000	-17837420.00000000	-21589008.00000000	-24947908.00000000	-16021053.00000000
246.25961304	-8918197.00000000	-9249674.00000000	-5765790.50000000	-11784246.00000000	-12230412.00000000	-7732953.50000000	-8729726.00000000	-10241652.00000000	-9801041.00000000	-14305409.00000000	-6736778.50000000	-7332102.00000000	-14329112.00000000	-11986542.00000000	-6590646.50000000	-13565105.00000000	-7091213.00000000	-7784500.00000000	-9345094.00000000	-6877951.50000000	-12707869.00000000	-10918139.00000000	-20668008.00000000	-22313368.00000000	-12562308.00000000	-14456853.00000000	-14602375.00000000	-9831942.00000000	-8151683.00000000	-5474696.00000000	-7950583.00000000	-9075576.00000000	-10267727.00000000	-8682865.00000000	-9012504.00000000	-5863373.50000000	-9894557.00000000	-9378639.00000000	-9609860.00000000	-9391401.00000000	-17356770.00000000	-12461326.00000000	-10896823.00000000	-16769300.00000000	-12027251.00000000	-17850002.00000000	-21885226.00000000	-24987380.00000000	-16606776.00000000
246.22778320	-8794789.00000000	-8863622.00000000	-6691876.00000000	-11622583.00000000	-12016663.00000000	-8200636.00000000	-8510999.00000000	-10414356.00000000	-9601319.00000000	-14475392.00000000	-7128944.00000000	-7454468.50000000	-14613307.00000000	-12566855.00000000	-7393416.50000000	-13453117.00000000	-7120244.00000000	-7766530.50000000	-8784048.00000000	-7672264.50000000	-12611133.00000000	-10960464.00000000	-21286232.00000000	-22239748.00000000	-12278175.00000000	-14666114.00000000	-14525973.00000000	-9708940.00000000	-8328698.00000000	-5597923.00000000	-8125398.50000000	-8692147.00000000	-10409003.00000000	-8551555.00000000	-9458269.00000000	-5741754.00000000	-10339396.00000000	-9213667.00000000	-9555982.00000000	-9568298.00000000	-17288260.00000000	-12819448.00000000	-10639927.00000000	-16879212.00000000	-11113968.00000000	-17834484.00000000	-22142336.00000000	-24882206.00000000	-17141494.00000000
246.19595337	-8537934.00000000	-8559349.00000000	-7335839.00000000	-11670922.00000000	-11661075.00000000	-8674119.00000000	-8166888.50000000	-10719783.00000000	-9104778.00000000	-14727910.00000000	-7547586.00000000	-7646677.50000000	-14943225.00000000	-13087281.00000000	-8001226.50000000	-13309275.00000000	-7268977.00000000	-7572024.00000000	-8287875.00000000	-8507868.00000000	-12744403.00000000	-10870002.00000000	-21566324.00000000	-22146680.00000000	-12076081.00000000	-14800635.00000000	-14451787.00000000	-9497330.00000000	-8528714.00000000	-5817665.00000000	-8306653.00000000	-8363524.50000000	-10718023.00000000	-8447278.00000000	-9953479.00000000	-5614028.50000000	-10635050.00000000	-8929640.00000000	-9704321.00000000	-9754034.00000000	-16997584.00000000	-13219405.00000000	-10403760.00000000	-16779752.00000000	-10401945.00000000	-17796140.00000000	-22391056.00000000	-24642966.00000000	-17554884.00000000
246.16409302	-8211216.50000000	-8318299.50000000	-7638207.00000000	-11820604.00000000	-11271715.00000000	-9060551.00000000	-7781367.50000000	-11135732.00000000	-8446405.00000000	-15033554.00000000	-7925977.00000000	-7908880.00000000	-15255251.00000000	-13535916.00000000	-8323255.50000000	-13186240.00000000	-7471002.00000000	-7300961.50000000	-7910225.50000000	-9320212.00000000	-13079331.00000000	-10773047.00000000	-21545454.00000000	-22025634.00000000	-12053076.00000000	-14840070.00000000	-14360070.00000000	-9301233.00000000	-8842526.00000000	-6074243.00000000	-8507201.00000000	-8234012.50000000	-11150745.00000000	-8403483.00000000	-10361106.00000000	-5546004.50000000	-10771067.00000000	-8614035.00000000	-10048829.00000000	-9934673.00000000	-16531013.00000000	-13636119.00000000	-10184045.00000000	-16510931.00000000	-9963280.00000000	-17780528.00000000	-22599742.00000000	-24333600.00000000	-17798204.00000000
246.13226318	-7865860.00000000	-8110932.50000000	-7687376.50000000	-11937346.00000000	-10912856.00000000	-9361548.00000000	-7470825.50000000	-11594286.00000000	-7767760.00000000	-15375262.00000000	-8156683.50000000	-8205860.00000000	-15527815.00000000	-13929442.00000000	-8369399.50000000	-13062111.00000000	-7626736.50000000	-7078027.50000000	-7672323.50000000	-10015740.00000000	-13519746.00000000	-10735496.00000000	-21394068.00000000	-21838160.00000000	-12263874.00000000	-14755995.00000000	-14263278.00000000	-9219317.00000000	-9340510.00000000	-6319035.50000000	-8771591.00000000	-8380543.00000000	-11644307.00000000	-8462011.00000000	-10598011.00000000	-5593241.00000000	-10725734.00000000	-8319014.00000000	-10549782.00000000	-10060177.00000000	-15978446.00000000	-14052330.00000000	-9974670.00000000	-16173215.00000000	-9790643.00000000	-17858756.00000000	-22722682.00000000	-24024942.00000000	-17826954.00000000
246.10041809	-7532275.00000000	-7935307.00000000	-7655846.50000000	-11929470.00000000	-10579730.00000000	-9610907.00000000	-7321634.50000000	-11973031.00000000	-7185583.50000000	-15726634.00000000	-8140923.00000000	-8459181.00000000	-15757701.00000000	-14245136.00000000	-8230207.00000000	-12889164.00000000	-7685874.00000000	-7011764.50000000	-7559105.00000000	-10528920.00000000	-13956848.00000000	-10711949.00000000	-21293824.00000000	-21591626.00000000	-12679739.00000000	-14534161.00000000	-14188223.00000000	-9286301.00000000	-10053395.00000000	-6524569.50000000	-9121561.00000000	-8763917.00000000	-12160584.00000000	-8631221.00000000	-10678935.00000000	-5775512.00000000	-10498703.00000000	-8053897.50000000	-11151241.00000000	-10071988.00000000	-15442710.00000000	-14475819.00000000	-9813894.00000000	-15874344.00000000	-9827108.00000000	-18073814.00000000	-22753342.00000000	-23744752.00000000	-17625296.00000000
246.06858826	-7233603.00000000	-7824256.50000000	-7687462.50000000	-11782858.00000000	-10233355.00000000	-9781332.00000000	-7374431.50000000	-12141859.00000000	-6767850.50000000	-16052302.00000000	-7836233.00000000	-8598028.00000000	-15903153.00000000	-14428374.00000000	-8022631.00000000	-12644802.00000000	-7664026.00000000	-7173008.50000000	-7536013.50000000	-10845056.00000000	-14322690.00000000	-10596244.00000000	-21323792.00000000	-21363612.00000000	-13203394.00000000	-14174941.00000000	-14140435.00000000	-9464795.00000000	-10963179.00000000	-6690336.50000000	-9484522.00000000	-9264669.00000000	-12692805.00000000	-8880686.00000000	-10686882.00000000	-6062936.00000000	-10135196.00000000	-7823379.50000000	-11775566.00000000	-9947477.00000000	-15013405.00000000	-14905372.00000000	-9777199.00000000	-15680798.00000000	-10004227.00000000	-18404150.00000000	-22716918.00000000	-23478018.00000000	-17251420.00000000
246.03672791	-7005712.50000000	-7820925.50000000	-7829115.50000000	-11541869.00000000	-9846248.00000000	-9772811.00000000	-7644883.50000000	-12046941.00000000	-6524820.50000000	-16332821.00000000	-7273124.50000000	-8609471.00000000	-15879916.00000000	-14453449.00000000	-7828614.50000000	-12331673.00000000	-7605143.00000000	-7583394.50000000	-7585063.50000000	-10974446.00000000	-14600091.00000000	-10323367.00000000	-21443968.00000000	-21245694.00000000	-13735201.00000000	-13684045.00000000	-14085689.00000000	-9688277.00000000	-11995892.00000000	-6832058.50000000	-9696807.00000000	-9766415.00000000	-13231213.00000000	-9158475.00000000	-10698928.00000000	-6384297.00000000	-9715042.00000000	-7659056.50000000	-12321103.00000000	-9726665.00000000	-14756152.00000000	-15296295.00000000	-9910268.00000000	-15610882.00000000	-10262351.00000000	-18786434.00000000	-22625780.00000000	-23214218.00000000	-16841168.00000000
246.00489807	-6896869.50000000	-7951695.00000000	-8042286.50000000	-11257887.00000000	-9419542.00000000	-9497554.00000000	-8130188.50000000	-11750702.00000000	-6426789.50000000	-16578886.00000000	-6540233.00000000	-8527414.00000000	-15631177.00000000	-14349635.00000000	-7666622.50000000	-11946784.00000000	-7551404.50000000	-8199011.50000000	-7724772.00000000	-10915986.00000000	-14790158.00000000	-9922645.00000000	-21566438.00000000	-21274296.00000000	-14230486.00000000	-13075616.00000000	-13970434.00000000	-9905256.00000000	-13031089.00000000	-6953880.50000000	-9604598.00000000	-10209743.00000000	-13733455.00000000	-9400707.00000000	-10732770.00000000	-6652540.00000000	-9323796.00000000	-7609469.50000000	-12693724.00000000	-9494832.00000000	-14703174.00000000	-15584724.00000000	-10174029.00000000	-15661274.00000000	-10549401.00000000	-19173084.00000000	-22468250.00000000	-22987948.00000000	-16543046.00000000
245.97306824	-6934860.00000000	-8219478.00000000	-8249346.50000000	-10953495.00000000	-8977823.00000000	-8961833.00000000	-8790592.00000000	-11377207.00000000	-6437256.00000000	-16810812.00000000	-5756451.00000000	-8377774.00000000	-15193357.00000000	-14159584.00000000	-7514705.00000000	-11476285.00000000	-7547124.50000000	-8895948.00000000	-7987170.00000000	-10655989.00000000	-14880346.00000000	-9475176.00000000	-21631294.00000000	-21421848.00000000	-14690437.00000000	-12384779.00000000	-13768335.00000000	-10083697.00000000	-13940867.00000000	-7030617.50000000	-9179542.00000000	-10584663.00000000	-14141135.00000000	-9539333.00000000	-10750519.00000000	-6792929.50000000	-9039047.00000000	-7700818.00000000	-12858845.00000000	-9332416.00000000	-14833905.00000000	-15754403.00000000	-10470734.00000000	-15825134.00000000	-10814481.00000000	-19561680.00000000	-22243570.00000000	-22866742.00000000	-16434529.00000000
245.94122314	-7088454.00000000	-8612206.00000000	-8361962.00000000	-10635367.00000000	-8563480.00000000	-8256744.00000000	-9545493.00000000	-11011995.00000000	-6531390.50000000	-17023804.00000000	-5043189.00000000	-8151003.00000000	-14677267.00000000	-13893647.00000000	-7357032.00000000	-10931734.00000000	-7645709.00000000	-9491658.00000000	-8376015.00000000	-10205097.00000000	-14850148.00000000	-9030490.00000000	-21629342.00000000	-21635302.00000000	-15097281.00000000	-11665798.00000000	-13517104.00000000	-10190162.00000000	-14642860.00000000	-7026738.00000000	-8547944.00000000	-10894282.00000000	-14424631.00000000	-9532831.00000000	-10705396.00000000	-6767187.50000000	-8930203.00000000	-7906021.50000000	-12866687.00000000	-9270655.00000000	-15065394.00000000	-15870744.00000000	-10732145.00000000	-16081542.00000000	-11010790.00000000	-19968942.00000000	-21983376.00000000	-22894080.00000000	-16495619.00000000
245.90937805	-7269981.00000000	-9108289.00000000	-8294763.50000000	-10336974.00000000	-8230041.00000000	-7487387.50000000	-10305238.00000000	-10653668.00000000	-6688700.50000000	-17178342.00000000	-4494840.00000000	-7833004.50000000	-14183234.00000000	-13547663.00000000	-7204628.50000000	-10382874.00000000	-7885940.50000000	-9823850.00000000	-8853262.00000000	-9630027.00000000	-14703646.00000000	-8576343.00000000	-21583592.00000000	-21857404.00000000	-15367646.00000000	-10970856.00000000	-13314835.00000000	-10188792.00000000	-15129367.00000000	-6937169.50000000	-7918089.00000000	-11130505.00000000	-14598037.00000000	-9406196.00000000	-10590437.00000000	-6594299.50000000	-9038165.00000000	-8145818.50000000	-12821313.00000000	-9279512.00000000	-15281591.00000000	-16043235.00000000	-10979855.00000000	-16383658.00000000	-11106534.00000000	-20383862.00000000	-21718736.00000000	-23037804.00000000	-16655414.00000000
245.87753296	-7391199.50000000	-9671764.00000000	-7998728.00000000	-10135804.00000000	-8022579.50000000	-6738886.00000000	-11004219.00000000	-10252356.00000000	-6882656.50000000	-17228454.00000000	-4148172.50000000	-7452604.50000000	-13747032.00000000	-13161807.00000000	-7073693.50000000	-9938509.00000000	-8251292.50000000	-9850860.00000000	-9362354.00000000	-9038655.00000000	-14486420.00000000	-8091189.50000000	-21529816.00000000	-22016316.00000000	-15381144.00000000	-10334494.00000000	-13272191.00000000	-10072394.00000000	-15447624.00000000	-6802528.00000000	-7476314.50000000	-11267833.00000000	-14681517.00000000	-9248254.00000000	-10455561.00000000	-6357356.50000000	-9328610.00000000	-8318034.50000000	-12817739.00000000	-9283298.00000000	-15390742.00000000	-16360257.00000000	-11295089.00000000	-16679784.00000000	-11094902.00000000	-20748708.00000000	-21435776.00000000	-23190376.00000000	-16853496.00000000
245.84570313	-7423613.00000000	-10248824.00000000	-7510164.50000000	-10114261.00000000	-7954063.00000000	-6109195.50000000	-11597101.00000000	-9777039.00000000	-7090454.50000000	-17158902.00000000	-3969933.00000000	-7090254.00000000	-13369708.00000000	-12839421.00000000	-6955684.50000000	-9683795.00000000	-8656662.00000000	-9693016.00000000	-9850703.00000000	-8524775.00000000	-14264728.00000000	-7615429.50000000	-21508552.00000000	-22032794.00000000	-15061220.00000000	-9781982.00000000	-13446418.00000000	-9887843.00000000	-15645951.00000000	-6678461.00000000	-7321824.00000000	-11266435.00000000	-14658959.00000000	-9145345.00000000	-10382434.00000000	-6175365.50000000	-9671028.00000000	-8337578.50000000	-12897279.00000000	-9187941.00000000	-15359565.00000000	-16857988.00000000	-11729665.00000000	-16954688.00000000	-10999798.00000000	-20978730.00000000	-21089126.00000000	-23228502.00000000	-17057126.00000000
245.81387329	-7400640.50000000	-10778034.00000000	-6962635.50000000	-10298846.00000000	-8003057.50000000	-5731631.50000000	-12035893.00000000	-9240670.00000000	-7309976.50000000	-16992388.00000000	-3886165.50000000	-6842588.00000000	-13078959.00000000	-12695393.00000000	-6820436.50000000	-9629879.00000000	-8985461.00000000	-9567574.00000000	-10265132.00000000	-8122433.00000000	-14088959.00000000	-7258579.50000000	-21553092.00000000	-21868852.00000000	-14432318.00000000	-9341877.00000000	-13800645.00000000	-9716145.00000000	-15729788.00000000	-6594236.50000000	-7452505.00000000	-11091505.00000000	-14490373.00000000	-9105441.00000000	-10435138.00000000	-6140872.50000000	-9896643.00000000	-8172260.50000000	-13048923.00000000	-8916390.00000000	-15195715.00000000	-17525330.00000000	-12247156.00000000	-17243434.00000000	-10878909.00000000	-20996814.00000000	-20669868.00000000	-23096664.00000000	-17240150.00000000
245.78201294	-7361398.00000000	-11209834.00000000	-6525521.50000000	-10643337.00000000	-8136931.50000000	-5714377.50000000	-12276850.00000000	-8677706.00000000	-7552909.50000000	-16761228.00000000	-3845648.75000000	-6777712.00000000	-12937634.00000000	-12790591.00000000	-6647738.00000000	-9717799.00000000	-9154619.00000000	-9659956.00000000	-10543052.00000000	-7810555.00000000	-13976159.00000000	-7130581.50000000	-21671426.00000000	-21564018.00000000	-13608730.00000000	-9034609.00000000	-14218488.00000000	-9619037.00000000	-15662107.00000000	-6545516.50000000	-7780466.00000000	-10754811.00000000	-14170157.00000000	-9049359.00000000	-10623769.00000000	-6266726.50000000	-9906541.00000000	-7860646.50000000	-13242533.00000000	-8451658.00000000	-14914266.00000000	-18302366.00000000	-12747248.00000000	-17594766.00000000	-10818409.00000000	-20763408.00000000	-20251668.00000000	-22854890.00000000	-17373892.00000000
245.75018311	-7306686.00000000	-11518343.00000000	-6305269.00000000	-11074047.00000000	-8334431.50000000	-6040622.50000000	-12320544.00000000	-8118633.50000000	-7813102.50000000	-16476175.00000000	-3871676.50000000	-6907356.00000000	-12989996.00000000	-13115402.00000000	-6446298.00000000	-9867793.00000000	-9160992.00000000	-10029475.00000000	-10633297.00000000	-7555483.00000000	-13919525.00000000	-7263550.50000000	-21841092.00000000	-21202746.00000000	-12740508.00000000	-8848523.00000000	-14565509.00000000	-9604561.00000000	-15402539.00000000	-6516448.00000000	-8168583.50000000	-10348480.00000000	-13759855.00000000	-8881079.00000000	-10909930.00000000	-6492665.00000000	-9730741.00000000	-7498302.50000000	-13464045.00000000	-7867483.50000000	-14544347.00000000	-19068444.00000000	-13142727.00000000	-18019598.00000000	-10907146.00000000	-20299630.00000000	-19962890.00000000	-22649510.00000000	-17452656.00000000
245.71833801	-7225407.50000000	-11694312.00000000	-6287957.00000000	-11542988.00000000	-8585740.00000000	-6547486.50000000	-12229516.00000000	-7586140.50000000	-8050170.50000000	-16125199.00000000	-4055428.50000000	-7180490.50000000	-13217985.00000000	-13613444.00000000	-6238581.00000000	-10032051.00000000	-9075774.00000000	-10608674.00000000	-10535405.00000000	-7340724.50000000	-13905034.00000000	-7594192.00000000	-22024450.00000000	-20842744.00000000	-11968589.00000000	-8744772.00000000	-14753815.00000000	-9642842.00000000	-14945647.00000000	-6488566.00000000	-8487629.00000000	-10023698.00000000	-13349574.00000000	-8569838.00000000	-11246311.00000000	-6748493.50000000	-9477817.00000000	-7191624.00000000	-13732523.00000000	-7313183.00000000	-14172852.00000000	-19667394.00000000	-13413976.00000000	-18473082.00000000	-11193979.00000000	-19696236.00000000	-19915116.00000000	-22619744.00000000	-17519366.00000000
245.68649292	-7160259.50000000	-11729211.00000000	-6365271.00000000	-12026513.00000000	-8880853.00000000	-7028864.00000000	-12085136.00000000	-7098921.00000000	-8218450.00000000	-15699556.00000000	-4491672.00000000	-7501935.50000000	-13564271.00000000	-14196346.00000000	-6038823.50000000	-10218377.00000000	-8991394.00000000	-11271747.00000000	-10311175.00000000	-7155897.50000000	-13919906.00000000	-8013782.50000000	-22183538.00000000	-20488818.00000000	-11405267.00000000	-8699931.00000000	-14765859.00000000	-9707419.00000000	-14325255.00000000	-6422967.00000000	-8671803.00000000	-9911726.00000000	-12987180.00000000	-8171464.50000000	-11611623.00000000	-7010536.50000000	-9230884.00000000	-7004165.50000000	-14094000.00000000	-6944753.50000000	-13957511.00000000	-19990544.00000000	-13599545.00000000	-18879382.00000000	-11656553.00000000	-19088746.00000000	-20151862.00000000	-22811424.00000000	-17650558.00000000
245.65464783	-7223391.50000000	-11612608.00000000	-6413454.00000000	-12476981.00000000	-9209349.00000000	-7371840.50000000	-11923046.00000000	-6670012.50000000	-8316638.50000000	-15212833.00000000	-5207352.00000000	-7777622.00000000	-13993154.00000000	-14742405.00000000	-5859462.00000000	-10477152.00000000	-8960013.00000000	-11906206.00000000	-10049420.00000000	-6973250.50000000	-13955150.00000000	-8433510.00000000	-22275820.00000000	-20136228.00000000	-11117893.00000000	-8737795.00000000	-14634462.00000000	-9793285.00000000	-13588347.00000000	-6252655.00000000	-8734516.00000000	-10047018.00000000	-12652273.00000000	-7779675.50000000	-12013615.00000000	-7296199.50000000	-8999655.00000000	-6932775.00000000	-14592639.00000000	-6841076.00000000	-14061611.00000000	-20052146.00000000	-13746089.00000000	-19168110.00000000	-12211079.00000000	-18597042.00000000	-20638628.00000000	-23167402.00000000	-17906368.00000000
245.62281799	-7523802.00000000	-11352410.00000000	-6361386.50000000	-12795949.00000000	-9570497.00000000	-7599522.50000000	-11721192.00000000	-6311181.00000000	-8402011.00000000	-14690432.00000000	-6135883.50000000	-7962752.50000000	-14517320.00000000	-15121292.00000000	-5736306.00000000	-10861334.00000000	-8968962.00000000	-12449205.00000000	-9818588.00000000	-6759707.00000000	-14007423.00000000	-8812646.00000000	-22247526.00000000	-19814464.00000000	-11104343.00000000	-8903378.00000000	-14411796.00000000	-9896127.00000000	-12771718.00000000	-5916031.00000000	-8733941.00000000	-10353985.00000000	-12299826.00000000	-7456747.50000000	-12469232.00000000	-7612797.00000000	-8763858.00000000	-6928559.00000000	-15230236.00000000	-6961995.50000000	-14550333.00000000	-19970036.00000000	-13873516.00000000	-19299778.00000000	-12757934.00000000	-18269632.00000000	-21274032.00000000	-23591950.00000000	-18290664.00000000
245.59098816	-8072209.50000000	-10999408.00000000	-6210862.00000000	-12875444.00000000	-9971845.00000000	-7797035.50000000	-11455350.00000000	-6049475.50000000	-8548555.00000000	-14145357.00000000	-7147459.00000000	-8071676.00000000	-15164099.00000000	-15259570.00000000	-5728594.50000000	-11377959.00000000	-8966736.00000000	-12890050.00000000	-9649935.00000000	-6526732.50000000	-14073965.00000000	-9142247.00000000	-22056030.00000000	-19570912.00000000	-11284133.00000000	-9202115.00000000	-14157580.00000000	-9985537.00000000	-11904346.00000000	-5403659.00000000	-8721763.00000000	-10695084.00000000	-11922380.00000000	-7197459.50000000	-12987760.00000000	-7927342.50000000	-8534000.00000000	-6938061.00000000	-15938936.00000000	-7172963.00000000	-15340603.00000000	-19856816.00000000	-13984212.00000000	-19282672.00000000	-13222668.00000000	-18082172.00000000	-21915354.00000000	-24013438.00000000	-18751144.00000000
245.55912781	-8760282.00000000	-10642874.00000000	-6015397.50000000	-12674217.00000000	-10409004.00000000	-8011426.50000000	-11155688.00000000	-5932196.50000000	-8789408.00000000	-13573973.00000000	-8104816.50000000	-8140776.00000000	-15925744.00000000	-15192781.00000000	-5878778.50000000	-11957801.00000000	-8909156.00000000	-13248789.00000000	-9552103.00000000	-6362837.50000000	-14138165.00000000	-9415543.00000000	-21715340.00000000	-19423642.00000000	-11531539.00000000	-9575042.00000000	-13940515.00000000	-10011549.00000000	-11025395.00000000	-4765031.50000000	-8715694.00000000	-10929492.00000000	-11567401.00000000	-6947314.00000000	-13563553.00000000	-8192740.00000000	-8348429.00000000	-6924886.50000000	-16592856.00000000	-7312768.00000000	-16247489.00000000	-19728486.00000000	-14095225.00000000	-19181720.00000000	-13561084.00000000	-17990836.00000000	-22433302.00000000	-24381446.00000000	-19207570.00000000
245.52729797	-9431100.00000000	-10365660.00000000	-5843130.50000000	-12257300.00000000	-10848749.00000000	-8219641.50000000	-10896177.00000000	-5998158.00000000	-9099255.00000000	-12980010.00000000	-8909615.00000000	-8187712.00000000	-16746331.00000000	-15045411.00000000	-6173875.00000000	-12466736.00000000	-8783587.00000000	-13536922.00000000	-9526772.00000000	-6397818.00000000	-14160246.00000000	-9616655.00000000	-21313066.00000000	-19352658.00000000	-11736495.00000000	-9938872.00000000	-13825600.00000000	-9943585.00000000	-10190454.00000000	-4070982.25000000	-8701129.00000000	-10951615.00000000	-11300518.00000000	-6659620.00000000	-14166818.00000000	-8395637.00000000	-8220851.50000000	-6858373.00000000	-17058142.00000000	-7260361.50000000	-17081370.00000000	-19520874.00000000	-14251788.00000000	-19100492.00000000	-13740984.00000000	-17983748.00000000	-22781740.00000000	-24624218.00000000	-19579782.00000000
245.49545288	-9963893.00000000	-10190137.00000000	-5744857.00000000	-11766151.00000000	-11236964.00000000	-8369367.50000000	-10728151.00000000	-6237348.50000000	-9426513.00000000	-12399876.00000000	-9525541.00000000	-8211285.50000000	-17549348.00000000	-14956871.00000000	-6556691.50000000	-12759275.00000000	-8602869.00000000	-13721481.00000000	-9570072.00000000	-6717655.00000000	-14092773.00000000	-9731302.00000000	-20961242.00000000	-19333764.00000000	-11846678.00000000	-10240978.00000000	-13841863.00000000	-9803710.00000000	-9457546.00000000	-3382973.50000000	-8642575.00000000	-10721667.00000000	-11157177.00000000	-6351590.00000000	-14735661.00000000	-8569929.00000000	-8118576.00000000	-6694780.00000000	-17249310.00000000	-6972053.00000000	-17716310.00000000	-19186068.00000000	-14506088.00000000	-19128754.00000000	-13738209.00000000	-18077508.00000000	-23025650.00000000	-24649888.00000000	-19806356.00000000
245.46362305	-10297209.00000000	-10064041.00000000	-5739759.00000000	-11349251.00000000	-11525305.00000000	-8433061.00000000	-10633151.00000000	-6585960.00000000	-9735220.00000000	-11900650.00000000	-9978439.00000000	-8216740.00000000	-18270298.00000000	-15027922.00000000	-6976978.00000000	-12745776.00000000	-8394702.00000000	-13729817.00000000	-9671308.00000000	-7303205.00000000	-13915217.00000000	-9760730.00000000	-20712952.00000000	-19354394.00000000	-11861458.00000000	-10468169.00000000	-13960946.00000000	-9660633.00000000	-8871419.00000000	-2762609.25000000	-8496535.00000000	-10296584.00000000	-11125020.00000000	-6114172.00000000	-15192085.00000000	-8766849.00000000	-8003933.00000000	-6385575.50000000	-17156812.00000000	-6483612.50000000	-18096254.00000000	-18761954.00000000	-14883096.00000000	-19289790.00000000	-13559740.00000000	-18271412.00000000	-23290480.00000000	-24419974.00000000	-19860192.00000000
245.43176270	-10397312.00000000	-9903406.00000000	-5822150.50000000	-11101185.00000000	-11693004.00000000	-8431543.00000000	-10547101.00000000	-6965958.00000000	-10016959.00000000	-11552453.00000000	-10333795.00000000	-8216862.00000000	-18867506.00000000	-15321387.00000000	-7423278.00000000	-12436159.00000000	-8204303.50000000	-13507246.00000000	-9818705.00000000	-8044323.00000000	-13656662.00000000	-9723893.00000000	-20523716.00000000	-19388346.00000000	-11795900.00000000	-10615339.00000000	-14117053.00000000	-9590306.00000000	-8464316.00000000	-2290428.25000000	-8235741.50000000	-9829741.00000000	-11164987.00000000	-6059987.00000000	-15486953.00000000	-9020502.00000000	-7881585.00000000	-5918380.50000000	-16837736.00000000	-5886128.00000000	-18206814.00000000	-18353178.00000000	-15363382.00000000	-19534632.00000000	-13265096.00000000	-18518836.00000000	-23672238.00000000	-24020770.00000000	-19760382.00000000
245.39993286	-10234366.00000000	-9654892.00000000	-5977345.50000000	-11033161.00000000	-11751151.00000000	-8428323.00000000	-10427923.00000000	-7324902.50000000	-10273179.00000000	-11399426.00000000	-10654347.00000000	-8200872.00000000	-19314478.00000000	-15874489.00000000	-7901201.00000000	-11939516.00000000	-8092345.00000000	-13083038.00000000	-10003441.00000000	-8807558.00000000	-13382311.00000000	-9650703.00000000	-20299346.00000000	-19385716.00000000	-11656067.00000000	-10669733.00000000	-14257492.00000000	-9638140.00000000	-8264800.00000000	-2046820.62500000	-7882017.00000000	-9507844.00000000	-11248453.00000000	-6246047.50000000	-15636415.00000000	-9339498.00000000	-7786560.50000000	-5359154.50000000	-16387137.00000000	-5290113.00000000	-18054714.00000000	-18060124.00000000	-15889290.00000000	-19783910.00000000	-12952705.00000000	-18749804.00000000	-24186354.00000000	-23640652.00000000	-19566924.00000000
245.36810303	-9798320.00000000	-9321540.00000000	-6186823.00000000	-11078002.00000000	-11733742.00000000	-8507395.00000000	-10293082.00000000	-7635686.00000000	-10497461.00000000	-11443757.00000000	-10954846.00000000	-8122616.50000000	-19591230.00000000	-16675555.00000000	-8391958.00000000	-11421503.00000000	-8104352.00000000	-12579661.00000000	-10216123.00000000	-9494003.00000000	-13153745.00000000	-9576850.00000000	-19986996.00000000	-19324560.00000000	-11445804.00000000	-10634799.00000000	-14374834.00000000	-9810357.00000000	-8291534.00000000	-2064963.87500000	-7518770.50000000	-9453800.00000000	-11378175.00000000	-6635465.00000000	-15705928.00000000	-9712965.00000000	-7729119.00000000	-4853794.50000000	-15907627.00000000	-4793929.00000000	-17670536.00000000	-17929770.00000000	-16379086.00000000	-19969142.00000000	-12716610.00000000	-18914368.00000000	-24782436.00000000	-23460292.00000000	-19354464.00000000
245.33624268	-9123336.00000000	-8935545.00000000	-6418102.00000000	-11129274.00000000	-11681759.00000000	-8736463.00000000	-10187736.00000000	-7870817.50000000	-10675690.00000000	-11641231.00000000	-11182007.00000000	-7943014.50000000	-19685546.00000000	-17629986.00000000	-8848177.00000000	-11035497.00000000	-8228084.50000000	-12149738.00000000	-10447275.00000000	-10051318.00000000	-12994102.00000000	-9538361.00000000	-19623954.00000000	-19275446.00000000	-11188692.00000000	-10553039.00000000	-14486547.00000000	-10090646.00000000	-8529186.00000000	-2312185.25000000	-7261348.00000000	-9672143.00000000	-11572168.00000000	-7127617.50000000	-15750608.00000000	-10107841.00000000	-7669404.00000000	-4572952.00000000	-15480953.00000000	-4464530.00000000	-17120676.00000000	-17956314.00000000	-16742234.00000000	-20037156.00000000	-12610289.00000000	-18996998.00000000	-25381642.00000000	-23558744.00000000	-19181394.00000000
245.30441284	-8280299.00000000	-8516056.00000000	-6622182.00000000	-11102235.00000000	-11624440.00000000	-9125725.00000000	-10117796.00000000	-7993678.50000000	-10794049.00000000	-11908874.00000000	-11238996.00000000	-7684672.00000000	-19606910.00000000	-18578556.00000000	-9233276.00000000	-10856139.00000000	-8386753.00000000	-11894289.00000000	-10698166.00000000	-10456742.00000000	-12879731.00000000	-9554725.00000000	-19303732.00000000	-19384526.00000000	-10934904.00000000	-10485989.00000000	-14585470.00000000	-10456806.00000000	-8913356.00000000	-2723431.75000000	-7203469.00000000	-10078418.00000000	-11820297.00000000	-7623744.00000000	-15770898.00000000	-10463922.00000000	-7553367.50000000	-4625764.50000000	-15145731.00000000	-4325302.50000000	-16507689.00000000	-18107412.00000000	-16905472.00000000	-19940536.00000000	-12641858.00000000	-18995040.00000000	-25894052.00000000	-23913220.00000000	-19073440.00000000
245.27256775	-7343079.00000000	-8058430.50000000	-6760970.50000000	-10977897.00000000	-11568914.00000000	-9614295.00000000	-10019696.00000000	-7975455.00000000	-10836907.00000000	-12153974.00000000	-11047007.00000000	-7427896.00000000	-19406658.00000000	-19377198.00000000	-9552805.00000000	-10853914.00000000	-8488133.00000000	-11826715.00000000	-10982784.00000000	-10705631.00000000	-12757233.00000000	-9604005.00000000	-19099864.00000000	-19767704.00000000	-10739609.00000000	-10469832.00000000	-14617580.00000000	-10879305.00000000	-9349688.00000000	-3244343.50000000	-7380925.50000000	-10571018.00000000	-12055307.00000000	-8071574.00000000	-15728070.00000000	-10711990.00000000	-7363097.50000000	-4995588.50000000	-14895109.00000000	-4344153.00000000	-15947628.00000000	-18345766.00000000	-16852072.00000000	-19654590.00000000	-12789492.00000000	-18900674.00000000	-26227460.00000000	-24461442.00000000	-19024852.00000000
245.24073792	-6367402.00000000	-7559241.00000000	-6847478.50000000	-10792720.00000000	-11510184.00000000	-10106750.00000000	-9802855.00000000	-7808534.00000000	-10776234.00000000	-12318957.00000000	-10610405.00000000	-7244497.00000000	-19182566.00000000	-19969280.00000000	-9835278.00000000	-10936300.00000000	-8488867.00000000	-11893657.00000000	-11300873.00000000	-10815674.00000000	-12575230.00000000	-9618694.00000000	-19019706.00000000	-20415744.00000000	-10626679.00000000	-10499628.00000000	-14515713.00000000	-11308842.00000000	-9755306.00000000	-3836020.00000000	-7770245.00000000	-11072351.00000000	-12176657.00000000	-8468020.00000000	-15598905.00000000	-10814565.00000000	-7124158.00000000	-5539969.50000000	-14702956.00000000	-4432849.00000000	-15530310.00000000	-18635846.00000000	-16646155.00000000	-19214062.00000000	-13012828.00000000	-18713434.00000000	-26318364.00000000	-25142664.00000000	-19005884.00000000
245.20889282	-5399378.00000000	-7041109.00000000	-6948191.50000000	-10585807.00000000	-11452063.00000000	-10534916.00000000	-9427646.00000000	-7500393.50000000	-10573092.00000000	-12408447.00000000	-10041944.00000000	-7140275.00000000	-19044584.00000000	-20385514.00000000	-10082390.00000000	-11031561.00000000	-8413916.00000000	-12014668.00000000	-11602283.00000000	-10832147.00000000	-12319259.00000000	-9525612.00000000	-19021492.00000000	-21200054.00000000	-10566257.00000000	-10557426.00000000	-14255518.00000000	-11676137.00000000	-10083611.00000000	-4453063.00000000	-8303028.50000000	-11517590.00000000	-12114784.00000000	-8838379.00000000	-15411286.00000000	-10791174.00000000	-6874370.00000000	-6053075.00000000	-14559198.00000000	-4479794.50000000	-15285204.00000000	-18936426.00000000	-16406313.00000000	-18717486.00000000	-13255502.00000000	-18463148.00000000	-26171664.00000000	-25887690.00000000	-18972118.00000000
245.17704773	-4490852.50000000	-6548906.00000000	-7123224.50000000	-10362883.00000000	-11410081.00000000	-10891840.00000000	-8944727.00000000	-7069988.00000000	-10203483.00000000	-12467726.00000000	-9520330.00000000	-7063255.00000000	-19050470.00000000	-20684920.00000000	-10245265.00000000	-11145290.00000000	-8318443.50000000	-12108869.00000000	-11791497.00000000	-10820891.00000000	-12031564.00000000	-9308529.00000000	-19065434.00000000	-21956104.00000000	-10487377.00000000	-10643040.00000000	-13874598.00000000	-11917549.00000000	-10312045.00000000	-5042885.50000000	-8876721.00000000	-11834390.00000000	-11874695.00000000	-9211873.00000000	-15231181.00000000	-10697990.00000000	-6641621.50000000	-6347861.50000000	-14480289.00000000	-4416181.50000000	-15178099.00000000	-19186006.00000000	-16233456.00000000	-18276826.00000000	-13452950.00000000	-18208054.00000000	-25860838.00000000	-26603664.00000000	-18879726.00000000
245.14521790	-3695959.50000000	-6126262.50000000	-7351170.00000000	-10117550.00000000	-11384384.00000000	-11215141.00000000	-8459579.00000000	-6563666.00000000	-9691844.00000000	-12527132.00000000	-9194309.00000000	-6956207.00000000	-19163312.00000000	-20904188.00000000	-10252392.00000000	-11334119.00000000	-8234616.50000000	-12113467.00000000	-11785431.00000000	-10850243.00000000	-11796514.00000000	-9034712.00000000	-19148622.00000000	-22554056.00000000	-10321046.00000000	-10768258.00000000	-13438372.00000000	-12012661.00000000	-10416581.00000000	-5575762.50000000	-9372524.00000000	-11956845.00000000	-11513226.00000000	-9597171.00000000	-15122668.00000000	-10581192.00000000	-6448968.50000000	-6314010.00000000	-14484374.00000000	-4273061.50000000	-15142287.00000000	-19303460.00000000	-16147600.00000000	-17957560.00000000	-13553282.00000000	-18008098.00000000	-25476734.00000000	-27190450.00000000	-18705702.00000000
245.11335754	-3053680.50000000	-5799276.00000000	-7520178.50000000	-9878095.00000000	-11333306.00000000	-11550053.00000000	-8061939.00000000	-6065446.00000000	-9119719.00000000	-12566365.00000000	-9094411.00000000	-6798443.00000000	-19278270.00000000	-21052740.00000000	-10059345.00000000	-11618795.00000000	-8149699.00000000	-12007188.00000000	-11571959.00000000	-10968896.00000000	-11692357.00000000	-8812392.00000000	-19300888.00000000	-22915068.00000000	-10044110.00000000	-10926036.00000000	-12994876.00000000	-12000917.00000000	-10371529.00000000	-6062425.50000000	-9696941.00000000	-11864881.00000000	-11075220.00000000	-9968327.00000000	-15117251.00000000	-10454646.00000000	-6318239.50000000	-5941659.50000000	-14561794.00000000	-4175826.00000000	-15120255.00000000	-19224764.00000000	-16086823.00000000	-17768124.00000000	-13539610.00000000	-17905934.00000000	-25069788.00000000	-27567554.00000000	-18459210.00000000
245.08152771	-2580130.25000000	-5578188.00000000	-7511453.50000000	-9713808.00000000	-11187868.00000000	-11931102.00000000	-7791289.00000000	-5668216.00000000	-8595773.00000000	-12531697.00000000	-9122426.00000000	-6618892.00000000	-19300444.00000000	-21133448.00000000	-9675232.00000000	-11923011.00000000	-8021806.00000000	-11826040.00000000	-11208014.00000000	-11185346.00000000	-11744055.00000000	-8714414.00000000	-19555086.00000000	-23008334.00000000	-9692754.00000000	-11073511.00000000	-12569839.00000000	-11956110.00000000	-10178911.00000000	-6527787.00000000	-9829530.00000000	-11607094.00000000	-10557903.00000000	-10285041.00000000	-15206722.00000000	-10324460.00000000	-6250233.50000000	-5325726.50000000	-14675643.00000000	-4268787.50000000	-15087768.00000000	-18958976.00000000	-15963756.00000000	-17695010.00000000	-13437584.00000000	-17930320.00000000	-24634836.00000000	-27676444.00000000	-18173396.00000000
245.04968262	-2279025.50000000	-5467028.50000000	-7305409.50000000	-9682241.00000000	-10901993.00000000	-12381797.00000000	-7661717.00000000	-5422856.50000000	-8209752.00000000	-12382662.00000000	-9133947.00000000	-6495554.00000000	-19198456.00000000	-21154478.00000000	-9152895.00000000	-12101795.00000000	-7808776.00000000	-11644157.00000000	-10763219.00000000	-11458810.00000000	-11917103.00000000	-8738205.00000000	-19916258.00000000	-22862520.00000000	-9339934.00000000	-11144643.00000000	-12199872.00000000	-11934746.00000000	-9890065.00000000	-6969028.50000000	-9830672.00000000	-11285132.00000000	-9936667.00000000	-10545550.00000000	-15355165.00000000	-10226942.00000000	-6207313.50000000	-4651604.50000000	-14788540.00000000	-4625151.50000000	-15053155.00000000	-18606992.00000000	-15723991.00000000	-17729158.00000000	-13304804.00000000	-18096992.00000000	-24135322.00000000	-27473398.00000000	-17888158.00000000
245.01785278	-2156078.75000000	-5471946.00000000	-7009664.50000000	-9773937.00000000	-10487405.00000000	-12904101.00000000	-7697924.50000000	-5321462.50000000	-8006855.00000000	-12118782.00000000	-9046789.00000000	-6534871.00000000	-18984360.00000000	-21125784.00000000	-8562440.00000000	-12034748.00000000	-7489369.50000000	-11521116.00000000	-10275481.00000000	-11714650.00000000	-12153778.00000000	-8830584.00000000	-20342998.00000000	-22570814.00000000	-9059898.00000000	-11077019.00000000	-11953939.00000000	-11942176.00000000	-9586680.00000000	-7347172.50000000	-9791041.00000000	-11015431.00000000	-9216262.00000000	-10818811.00000000	-15523051.00000000	-10229168.00000000	-6134812.00000000	-4141099.00000000	-14878182.00000000	-5210655.00000000	-15046138.00000000	-18309722.00000000	-15362488.00000000	-17854476.00000000	-13208774.00000000	-18385860.00000000	-23532488.00000000	-26951232.00000000	-17643482.00000000
244.98602295	-2223414.50000000	-5607490.00000000	-6781447.50000000	-9917653.00000000	-9998869.00000000	-13452916.00000000	-7925657.50000000	-5334367.00000000	-7993490.50000000	-11771655.00000000	-8881470.00000000	-6807832.00000000	-18657886.00000000	-21051958.00000000	-7966759.00000000	-11701113.00000000	-7071194.00000000	-11458635.00000000	-9762912.00000000	-11884850.00000000	-12412417.00000000	-8938612.00000000	-20747162.00000000	-22257638.00000000	-8905825.00000000	-10838020.00000000	-11907713.00000000	-11947577.00000000	-9336116.00000000	-7616151.00000000	-9764527.00000000	-10895742.00000000	-8454327.00000000	-11201687.00000000	-15693600.00000000	-10381619.00000000	-6008563.50000000	-3957826.25000000	-14924394.00000000	-5917801.00000000	-15106170.00000000	-18163926.00000000	-14909069.00000000	-18031542.00000000	-13200523.00000000	-18719118.00000000	-22806984.00000000	-26181514.00000000	-17487854.00000000
244.95416260	-2494480.00000000	-5895676.50000000	-6717961.00000000	-10041322.00000000	-9495752.00000000	-13927728.00000000	-8323065.00000000	-5451519.50000000	-8151384.00000000	-11389697.00000000	-8705650.00000000	-7268761.50000000	-18193436.00000000	-20926076.00000000	-7402505.50000000	-11182033.00000000	-6584279.50000000	-11409715.00000000	-9262138.00000000	-11948027.00000000	-12673913.00000000	-9035954.00000000	-21018494.00000000	-22023934.00000000	-8906418.00000000	-10449876.00000000	-12094873.00000000	-11931186.00000000	-9167375.00000000	-7748726.50000000	-9747286.00000000	-10987403.00000000	-7746465.00000000	-11723948.00000000	-15880748.00000000	-10665109.00000000	-5854885.50000000	-4125473.25000000	-14896021.00000000	-6627331.50000000	-15268354.00000000	-18179852.00000000	-14419583.00000000	-18214774.00000000	-13289481.00000000	-18985894.00000000	-21982160.00000000	-25317216.00000000	-17479632.00000000
244.92233276	-2974849.25000000	-6347068.50000000	-6809687.00000000	-10127256.00000000	-9028235.00000000	-14206924.00000000	-8796692.00000000	-5674830.00000000	-8435993.00000000	-11037915.00000000	-8550339.00000000	-7742240.50000000	-17589920.00000000	-20725416.00000000	-6868884.50000000	-10607733.00000000	-6063176.00000000	-11334812.00000000	-8833967.00000000	-11935522.00000000	-12924469.00000000	-9120702.00000000	-21073550.00000000	-21918086.00000000	-9071730.00000000	-10003925.00000000	-12487021.00000000	-11912241.00000000	-9088898.00000000	-7735284.00000000	-9716919.00000000	-11310010.00000000	-7197299.00000000	-12297469.00000000	-16106817.00000000	-10983307.00000000	-5717251.50000000	-4529160.00000000	-14771079.00000000	-7245240.50000000	-15546380.00000000	-18305048.00000000	-13979326.00000000	-18384632.00000000	-13430771.00000000	-19110602.00000000	-21142634.00000000	-24526116.00000000	-17663338.00000000
244.89048767	-3648205.50000000	-6930524.00000000	-6978742.50000000	-10214706.00000000	-8652781.00000000	-14206127.00000000	-9222232.00000000	-5977121.50000000	-8767635.00000000	-10796609.00000000	-8387402.50000000	-8024605.00000000	-16916682.00000000	-20420444.00000000	-6337659.00000000	-10100785.00000000	-5532115.50000000	-11251911.00000000	-8525410.00000000	-11895791.00000000	-13147289.00000000	-9212530.00000000	-20906076.00000000	-21946116.00000000	-9401129.00000000	-9639251.00000000	-13018380.00000000	-11923976.00000000	-9117359.00000000	-7576798.00000000	-9680599.00000000	-11842374.00000000	-6890593.50000000	-12773846.00000000	-16369626.00000000	-11211366.00000000	-5609602.50000000	-5006653.50000000	-14574785.00000000	-7705900.00000000	-15922830.00000000	-18466054.00000000	-13687288.00000000	-18543464.00000000	-13537916.00000000	-19101164.00000000	-20418754.00000000	-23906964.00000000	-18032110.00000000
244.85864258	-4459122.00000000	-7564703.00000000	-7145566.00000000	-10360571.00000000	-8434738.00000000	-13917319.00000000	-9515718.00000000	-6289023.50000000	-9043675.00000000	-10734833.00000000	-8182364.50000000	-8024956.00000000	-16287999.00000000	-20001674.00000000	-5790651.50000000	-9742322.00000000	-5012020.00000000	-11230977.00000000	-8332849.50000000	-11848470.00000000	-13332868.00000000	-9353909.00000000	-20600930.00000000	-22092146.00000000	-9891223.00000000	-9479778.00000000	-13617882.00000000	-11960141.00000000	-9272527.00000000	-7296908.00000000	-9674624.00000000	-12526034.00000000	-6853599.00000000	-13060571.00000000	-16637541.00000000	-11264166.00000000	-5513131.50000000	-5451628.00000000	-14382111.00000000	-7968959.50000000	-16355808.00000000	-18580958.00000000	-13602092.00000000	-18668886.00000000	-13520881.00000000	-19024514.00000000	-19932966.00000000	-23462726.00000000	-18513340.00000000
244.82679749	-5309760.00000000	-8155106.50000000	-7263180.50000000	-10598748.00000000	-8413321.00000000	-13408827.00000000	-9666921.00000000	-6532846.00000000	-9177528.00000000	-10871520.00000000	-7952647.00000000	-7812952.50000000	-15785239.00000000	-19502468.00000000	-5262322.00000000	-9557164.00000000	-4546226.00000000	-11336029.00000000	-8205306.00000000	-11770325.00000000	-13482865.00000000	-9589452.00000000	-20294370.00000000	-22329182.00000000	-10533958.00000000	-9568986.00000000	-14211223.00000000	-11954032.00000000	-9537052.00000000	-6956987.50000000	-9716610.00000000	-13270382.00000000	-7029639.00000000	-13181866.00000000	-16882416.00000000	-11136302.00000000	-5418850.50000000	-5843809.50000000	-14265627.00000000	-8030802.50000000	-16792950.00000000	-18559362.00000000	-13685000.00000000	-18683676.00000000	-13330807.00000000	-18938042.00000000	-19751428.00000000	-23140106.00000000	-19000058.00000000
244.79496765	-6089008.50000000	-8650031.00000000	-7314470.50000000	-10921696.00000000	-8562718.00000000	-12799908.00000000	-9712374.00000000	-6655746.00000000	-9133152.00000000	-11166136.00000000	-7765524.00000000	-7534757.50000000	-15411617.00000000	-18985886.00000000	-4846827.00000000	-9515190.00000000	-4213230.50000000	-11567227.00000000	-8077460.50000000	-11624595.00000000	-13590916.00000000	-9920675.00000000	-20104392.00000000	-22632804.00000000	-11293394.00000000	-9855586.00000000	-14706679.00000000	-11823171.00000000	-9828653.00000000	-6639434.50000000	-9769322.00000000	-13964351.00000000	-7296556.50000000	-13233704.00000000	-17113514.00000000	-10892224.00000000	-5361902.00000000	-6203261.00000000	-14240309.00000000	-7938312.50000000	-17180038.00000000	-18335728.00000000	-13799910.00000000	-18494076.00000000	-12987400.00000000	-18856334.00000000	-19881772.00000000	-22881786.00000000	-19406946.00000000
244.76313782	-6725552.50000000	-9056684.00000000	-7303935.50000000	-11284178.00000000	-8798762.00000000	-12225171.00000000	-9691046.00000000	-6621737.50000000	-8924062.00000000	-11556402.00000000	-7686316.00000000	-7295565.00000000	-15125682.00000000	-18502670.00000000	-4650658.50000000	-9557335.00000000	-4099690.75000000	-11853196.00000000	-7899228.00000000	-11402761.00000000	-13622979.00000000	-10283576.00000000	-20078846.00000000	-23004406.00000000	-12074484.00000000	-10238087.00000000	-15010209.00000000	-11543722.00000000	-10026045.00000000	-6400496.00000000	-9765549.00000000	-14502824.00000000	-7537438.00000000	-13295292.00000000	-17371536.00000000	-10620601.00000000	-5405518.50000000	-6540212.50000000	-14268765.00000000	-7779010.00000000	-17467614.00000000	-17925852.00000000	-13787104.00000000	-18070432.00000000	-12576209.00000000	-18783658.00000000	-20301298.00000000	-22649474.00000000	-19705228.00000000
244.73127747	-7224643.00000000	-9399921.00000000	-7256564.50000000	-11624915.00000000	-9031150.00000000	-11788842.00000000	-9633237.00000000	-6393421.50000000	-8586166.00000000	-12009336.00000000	-7739772.00000000	-7122698.50000000	-14907915.00000000	-18067918.00000000	-4720420.00000000	-9640270.00000000	-4247794.00000000	-12096076.00000000	-7650886.50000000	-11137276.00000000	-13529863.00000000	-10589835.00000000	-20189224.00000000	-23474408.00000000	-12725391.00000000	-10623365.00000000	-15081259.00000000	-11183390.00000000	-10034971.00000000	-6236956.50000000	-9678164.00000000	-14822949.00000000	-7706540.00000000	-13389112.00000000	-17688920.00000000	-10384274.00000000	-5594986.50000000	-6852838.50000000	-14319041.00000000	-7644415.00000000	-17629894.00000000	-17439784.00000000	-13556095.00000000	-17492902.00000000	-12217559.00000000	-18756016.00000000	-20967200.00000000	-22428896.00000000	-19911330.00000000
244.69944763	-7652623.00000000	-9676938.00000000	-7206177.50000000	-11901204.00000000	-9211091.00000000	-11517680.00000000	-9581831.00000000	-5958300.00000000	-8160607.00000000	-12535110.00000000	-7917364.50000000	-7009703.00000000	-14785420.00000000	-17684106.00000000	-5003061.50000000	-9766986.00000000	-4623549.00000000	-12226670.00000000	-7354219.00000000	-10875501.00000000	-13285514.00000000	-10797811.00000000	-20360134.00000000	-24061046.00000000	-13098090.00000000	-10953753.00000000	-14981022.00000000	-10858002.00000000	-9839521.00000000	-6099798.00000000	-9566826.00000000	-14926824.00000000	-7824584.00000000	-13506387.00000000	-18060974.00000000	-10192481.00000000	-5934258.00000000	-7149500.50000000	-14396842.00000000	-7592375.00000000	-17691294.00000000	-17015598.00000000	-13124713.00000000	-16919880.00000000	-12016898.00000000	-18823682.00000000	-21800376.00000000	-22233700.00000000	-20048606.00000000
244.66760254	-8077788.00000000	-9870418.00000000	-7166726.50000000	-12118657.00000000	-9336156.00000000	-11348450.00000000	-9603757.00000000	-5387446.50000000	-7698679.00000000	-13155126.00000000	-8201893.50000000	-6955581.50000000	-14799718.00000000	-17378276.00000000	-5372712.00000000	-9975790.00000000	-5135937.00000000	-12228701.00000000	-7077435.50000000	-10645493.00000000	-12909168.00000000	-10932597.00000000	-20509838.00000000	-24716224.00000000	-13129067.00000000	-11203633.00000000	-14855082.00000000	-10651036.00000000	-9500918.00000000	-5938181.50000000	-9549380.00000000	-14869249.00000000	-7913923.00000000	-13639936.00000000	-18452848.00000000	-10004923.00000000	-6403545.00000000	-7443784.00000000	-14503595.00000000	-7635164.50000000	-17731880.00000000	-16729843.00000000	-12585397.00000000	-16512024.00000000	-12012059.00000000	-18987058.00000000	-22688420.00000000	-22095242.00000000	-20124704.00000000
244.63575745	-8516984.00000000	-10005721.00000000	-7115909.50000000	-12331847.00000000	-9424247.00000000	-11180201.00000000	-9763289.00000000	-4845145.00000000	-7261311.50000000	-13861276.00000000	-8568880.00000000	-6954949.50000000	-14967056.00000000	-17199410.00000000	-5703477.50000000	-10300003.00000000	-5688601.50000000	-12129578.00000000	-6914811.50000000	-10451245.00000000	-12450967.00000000	-11028624.00000000	-20587476.00000000	-25321576.00000000	-12865308.00000000	-11371958.00000000	-14852383.00000000	-10568940.00000000	-9116796.00000000	-5730845.50000000	-9716687.00000000	-14719513.00000000	-7953299.50000000	-13778503.00000000	-18820440.00000000	-9759890.00000000	-6982253.50000000	-7722182.50000000	-14570912.00000000	-7753526.00000000	-17851754.00000000	-16571044.00000000	-12045312.00000000	-16372724.00000000	-12143003.00000000	-19166576.00000000	-23535160.00000000	-22023980.00000000	-20143662.00000000
244.60392761	-8930491.00000000	-10170381.00000000	-7021282.00000000	-12612227.00000000	-9490622.00000000	-10962390.00000000	-10073980.00000000	-4505415.00000000	-6890479.00000000	-14607621.00000000	-8966119.00000000	-6981953.50000000	-15271479.00000000	-17173528.00000000	-5930434.50000000	-10737571.00000000	-6216932.50000000	-11985356.00000000	-6940638.50000000	-10298393.00000000	-11971451.00000000	-11064951.00000000	-20599184.00000000	-25747384.00000000	-12409652.00000000	-11477229.00000000	-15042705.00000000	-10565444.00000000	-8781261.00000000	-5487005.50000000	-10064957.00000000	-14530073.00000000	-7903387.50000000	-13883553.00000000	-19113118.00000000	-9407924.00000000	-7637863.50000000	-7935089.00000000	-14466980.00000000	-7915793.00000000	-18113924.00000000	-16490919.00000000	-11592955.00000000	-16530606.00000000	-12271542.00000000	-19251852.00000000	-24313016.00000000	-21978404.00000000	-20129574.00000000
244.57208252	-9259846.00000000	-10453013.00000000	-6890636.50000000	-13009843.00000000	-9538588.00000000	-10740298.00000000	-10470394.00000000	-4439713.50000000	-6577149.00000000	-15338197.00000000	-9306131.00000000	-7014438.00000000	-15676333.00000000	-17268002.00000000	-6054918.50000000	-11249121.00000000	-6683251.00000000	-11876688.00000000	-7171847.50000000	-10214199.00000000	-11550164.00000000	-10975010.00000000	-20607684.00000000	-25917802.00000000	-11846971.00000000	-11538426.00000000	-15395053.00000000	-10600670.00000000	-8569842.00000000	-5232626.50000000	-10505627.00000000	-14331764.00000000	-7761790.50000000	-13896374.00000000	-19263394.00000000	-8933571.00000000	-8290953.00000000	-8036818.00000000	-14093051.00000000	-8088095.50000000	-18507036.00000000	-16464242.00000000	-11293131.00000000	-16949436.00000000	-12254809.00000000	-19181672.00000000	-25051896.00000000	-21890612.00000000	-20124864.00000000
244.54025269	-9465376.00000000	-10862144.00000000	-6790255.00000000	-13533691.00000000	-9553211.00000000	-10609246.00000000	-10824968.00000000	-4584471.00000000	-6272382.00000000	-16020991.00000000	-9489906.00000000	-7070842.00000000	-16123826.00000000	-17401938.00000000	-6101585.50000000	-11767090.00000000	-7048029.00000000	-11901192.00000000	-7573473.00000000	-10230964.00000000	-11303183.00000000	-10718640.00000000	-20693750.00000000	-25826668.00000000	-11232140.00000000	-11544368.00000000	-15821930.00000000	-10675274.00000000	-8541836.00000000	-5000913.00000000	-10941606.00000000	-14140207.00000000	-7572631.00000000	-13782218.00000000	-19196520.00000000	-8359481.00000000	-8807544.00000000	-8034208.00000000	-13477778.00000000	-8242297.50000000	-18948390.00000000	-16496375.00000000	-11174574.00000000	-17549414.00000000	-12035599.00000000	-18971846.00000000	-25766378.00000000	-21737856.00000000	-20157652.00000000
244.50839233	-9529812.00000000	-11320903.00000000	-6802156.00000000	-14151271.00000000	-9499779.00000000	-10620135.00000000	-11001729.00000000	-4816853.00000000	-5943985.50000000	-16658038.00000000	-9445335.00000000	-7200724.00000000	-16530047.00000000	-17483404.00000000	-6075341.00000000	-12197615.00000000	-7260052.00000000	-12140153.00000000	-8095422.00000000	-10348257.00000000	-11353354.00000000	-10325833.00000000	-20900274.00000000	-25515652.00000000	-10638654.00000000	-11446528.00000000	-16243028.00000000	-10816626.00000000	-8741613.00000000	-4825141.50000000	-11337873.00000000	-13951144.00000000	-7381094.50000000	-13567891.00000000	-18869732.00000000	-7738404.00000000	-9049675.00000000	-7987347.50000000	-12767303.00000000	-8371315.50000000	-19317524.00000000	-16592140.00000000	-11198419.00000000	-18239730.00000000	-11687684.00000000	-18673654.00000000	-26398028.00000000	-21581460.00000000	-20211350.00000000
244.47656250	-9437530.00000000	-11746446.00000000	-6958183.00000000	-14795169.00000000	-9344799.00000000	-10731791.00000000	-10915125.00000000	-5057503.00000000	-5620987.00000000	-17266410.00000000	-9156805.00000000	-7429045.50000000	-16809938.00000000	-17438084.00000000	-5959459.50000000	-12427683.00000000	-7289638.00000000	-12606781.00000000	-8695302.00000000	-10520867.00000000	-11745251.00000000	-9862465.00000000	-21207590.00000000	-25062412.00000000	-10183634.00000000	-11200929.00000000	-16619098.00000000	-11045173.00000000	-9190681.00000000	-4725531.50000000	-11722927.00000000	-13731903.00000000	-7197412.50000000	-13331567.00000000	-18307432.00000000	-7139652.00000000	-8953438.00000000	-7962299.50000000	-12118565.00000000	-8502179.00000000	-19505456.00000000	-16738382.00000000	-11248297.00000000	-18956940.00000000	-11376693.00000000	-18321452.00000000	-26834978.00000000	-21524622.00000000	-20232204.00000000
244.44471741	-9164323.00000000	-12119953.00000000	-7214537.50000000	-15378484.00000000	-9099066.00000000	-10854799.00000000	-10559875.00000000	-5306603.50000000	-5372762.00000000	-17849140.00000000	-8678111.00000000	-7715831.50000000	-16932578.00000000	-17230472.00000000	-5751708.00000000	-12359705.00000000	-7181314.00000000	-13214180.00000000	-9323460.00000000	-10692642.00000000	-12380946.00000000	-9371845.00000000	-21562728.00000000	-24582910.00000000	-9969998.00000000	-10829711.00000000	-16940462.00000000	-11358956.00000000	-9874600.00000000	-4694046.50000000	-12127006.00000000	-13437435.00000000	-7017406.50000000	-13149223.00000000	-17592762.00000000	-6629931.00000000	-8568024.00000000	-7986622.50000000	-11602346.00000000	-8684873.00000000	-19471618.00000000	-16914968.00000000	-11185842.00000000	-19684688.00000000	-11258339.00000000	-17923884.00000000	-26986078.00000000	-21631424.00000000	-20170748.00000000
244.41288757	-8696072.00000000	-12466806.00000000	-7484099.00000000	-15826488.00000000	-8845354.00000000	-10934589.00000000	-9997870.00000000	-5604573.50000000	-5241889.00000000	-18381128.00000000	-8127021.00000000	-7972217.50000000	-16955160.00000000	-16892638.00000000	-5497268.50000000	-11961944.00000000	-7069491.50000000	-13794508.00000000	-9898118.00000000	-10839117.00000000	-13060704.00000000	-8872771.00000000	-21924294.00000000	-24205776.00000000	-9994838.00000000	-10439965.00000000	-17190500.00000000	-11740078.00000000	-10733085.00000000	-4691422.50000000	-12523187.00000000	-13054239.00000000	-6870521.50000000	-13040630.00000000	-16818396.00000000	-6250943.50000000	-8020168.00000000	-8043176.00000000	-11200604.00000000	-8954648.00000000	-19286332.00000000	-17104912.00000000	-10950369.00000000	-20434794.00000000	-11387559.00000000	-17488082.00000000	-26835562.00000000	-21889732.00000000	-20017578.00000000
244.38104248	-8056552.00000000	-12782950.00000000	-7683599.00000000	-16106762.00000000	-8711901.00000000	-10985558.00000000	-9318320.00000000	-5979277.00000000	-5204031.50000000	-18819056.00000000	-7653177.00000000	-8107309.00000000	-16988942.00000000	-16537943.00000000	-5283045.00000000	-11290648.00000000	-7119729.50000000	-14162155.00000000	-10314254.00000000	-10966164.00000000	-13613444.00000000	-8409124.00000000	-22265198.00000000	-24005964.00000000	-10130383.00000000	-10172169.00000000	-17321542.00000000	-12156794.00000000	-11660881.00000000	-4663514.00000000	-12830511.00000000	-12632418.00000000	-6834931.00000000	-12955511.00000000	-16039139.00000000	-6009429.00000000	-7436340.50000000	-8087573.50000000	-10873073.00000000	-9298732.00000000	-19114286.00000000	-17284842.00000000	-10618249.00000000	-21202688.00000000	-11705346.00000000	-17033202.00000000	-26439238.00000000	-22239462.00000000	-19801834.00000000
244.34919739	-7312101.50000000	-13012117.00000000	-7751788.50000000	-16221218.00000000	-8799176.00000000	-11050306.00000000	-8604553.00000000	-6427437.50000000	-5196702.00000000	-19121152.00000000	-7380420.00000000	-8063630.00000000	-17117184.00000000	-16312659.00000000	-5196395.00000000	-10459859.00000000	-7424960.50000000	-14184395.00000000	-10491584.00000000	-11064954.00000000	-14003205.00000000	-8067740.00000000	-22532740.00000000	-23955224.00000000	-10213043.00000000	-10120538.00000000	-17270300.00000000	-12548224.00000000	-12524922.00000000	-4570334.50000000	-12972175.00000000	-12265557.00000000	-7004482.50000000	-12808804.00000000	-15265144.00000000	-5896896.00000000	-6890443.50000000	-8063025.00000000	-10604258.00000000	-9660178.00000000	-19119888.00000000	-17417132.00000000	-10359011.00000000	-21937032.00000000	-12105521.00000000	-16581118.00000000	-25885910.00000000	-22616706.00000000	-19562988.00000000
244.31736755	-6545725.50000000	-13113495.00000000	-7645993.50000000	-16158097.00000000	-9113997.00000000	-11139688.00000000	-7927820.50000000	-6922451.50000000	-5179821.50000000	-19256116.00000000	-7353349.00000000	-7836416.50000000	-17336762.00000000	-16296842.00000000	-5282590.50000000	-9588416.00000000	-7940273.00000000	-13825458.00000000	-10421707.00000000	-11081759.00000000	-14316196.00000000	-7918896.00000000	-22632582.00000000	-23953426.00000000	-10160659.00000000	-10292767.00000000	-17006470.00000000	-12816516.00000000	-13195560.00000000	-4412221.00000000	-12927168.00000000	-12030812.00000000	-7443841.50000000	-12539918.00000000	-14494642.00000000	-5928081.50000000	-6412824.50000000	-7916588.00000000	-10388197.00000000	-9972518.00000000	-19349790.00000000	-17464118.00000000	-10320422.00000000	-22550188.00000000	-12515352.00000000	-16149554.00000000	-25265630.00000000	-22973516.00000000	-19331100.00000000
244.28550720	-5826068.00000000	-13142026.00000000	-7355600.00000000	-15859852.00000000	-9561161.00000000	-11219446.00000000	-7356670.50000000	-7423016.50000000	-5158406.50000000	-19200114.00000000	-7526996.50000000	-7490742.50000000	-17572308.00000000	-16443335.00000000	-5530910.00000000	-8772709.00000000	-8517476.00000000	-13151333.00000000	-10173366.00000000	-10948657.00000000	-14651377.00000000	-7938745.50000000	-22484164.00000000	-23919936.00000000	-10011988.00000000	-10634411.00000000	-16572932.00000000	-12860847.00000000	-13580465.00000000	-4236360.50000000	-12724716.00000000	-11945985.00000000	-8161311.50000000	-12155881.00000000	-13751408.00000000	-6152680.00000000	-6031973.00000000	-7632346.00000000	-10191071.00000000	-10183905.00000000	-19692422.00000000	-17409116.00000000	-10543091.00000000	-22962636.00000000	-12918563.00000000	-15760016.00000000	-24658632.00000000	-23286208.00000000	-19132314.00000000
244.25367737	-5198700.50000000	-13242915.00000000	-6937587.00000000	-15262233.00000000	-9994611.00000000	-11247496.00000000	-6956413.50000000	-7881830.50000000	-5147786.50000000	-18944244.00000000	-7803208.00000000	-7160025.50000000	-17741350.00000000	-16627519.00000000	-5892946.50000000	-8093929.50000000	-9011274.00000000	-12298403.00000000	-9854009.00000000	-10648050.00000000	-15022795.00000000	-8005281.00000000	-22101422.00000000	-23854216.00000000	-9868093.00000000	-11081112.00000000	-16075076.00000000	-12645896.00000000	-13649201.00000000	-4113957.50000000	-12393187.00000000	-11982058.00000000	-9095774.00000000	-11730154.00000000	-13090899.00000000	-6606647.50000000	-5791548.50000000	-7263453.50000000	-9949816.00000000	-10246025.00000000	-19958560.00000000	-17255088.00000000	-10970685.00000000	-23149632.00000000	-13313918.00000000	-15437963.00000000	-24134760.00000000	-23569312.00000000	-19001036.00000000
244.22183228	-4698558.50000000	-13557229.00000000	-6528066.50000000	-14380084.00000000	-10287747.00000000	-11213774.00000000	-6770661.50000000	-8265682.50000000	-5130449.50000000	-18525024.00000000	-8076260.00000000	-6995381.00000000	-17807998.00000000	-16763465.00000000	-6315566.50000000	-7622756.00000000	-9361122.00000000	-11418352.00000000	-9559133.00000000	-10241075.00000000	-15351485.00000000	-7978082.50000000	-21603316.00000000	-23809384.00000000	-9805917.00000000	-11586374.00000000	-15622727.00000000	-12246106.00000000	-13445435.00000000	-4099127.00000000	-11921120.00000000	-12109288.00000000	-10113220.00000000	-11360343.00000000	-12568770.00000000	-7236895.50000000	-5721041.00000000	-6918765.50000000	-9610140.00000000	-10094547.00000000	-20014654.00000000	-17007850.00000000	-11522353.00000000	-23161570.00000000	-13670213.00000000	-15187252.00000000	-23751580.00000000	-23870450.00000000	-18973350.00000000
244.19000244	-4358927.50000000	-14127137.00000000	-6287336.50000000	-13347424.00000000	-10378342.00000000	-11145457.00000000	-6800589.50000000	-8574791.00000000	-5061513.50000000	-18049944.00000000	-8255157.50000000	-7081876.50000000	-17786114.00000000	-16866262.00000000	-6766741.50000000	-7395646.50000000	-9583685.00000000	-10624007.00000000	-9340697.00000000	-9831466.00000000	-15529242.00000000	-7781324.00000000	-21126532.00000000	-23821102.00000000	-9836769.00000000	-12110007.00000000	-15277778.00000000	-11811794.00000000	-13085794.00000000	-4201270.50000000	-11272488.00000000	-12323345.00000000	-11030537.00000000	-11115143.00000000	-12200158.00000000	-7886595.50000000	-5796473.50000000	-6694886.00000000	-9160931.00000000	-9665807.00000000	-19855262.00000000	-16677792.00000000	-12141190.00000000	-23105186.00000000	-13935587.00000000	-14964904.00000000	-23542940.00000000	-24220162.00000000	-19062726.00000000
244.15815735	-4200116.50000000	-14875826.00000000	-6301946.50000000	-12357418.00000000	-10271804.00000000	-11086268.00000000	-6997610.00000000	-8832628.00000000	-4921614.50000000	-17672470.00000000	-8272401.00000000	-7390370.50000000	-17705410.00000000	-17005648.00000000	-7237681.00000000	-7387025.00000000	-9709499.00000000	-9967675.00000000	-9204944.00000000	-9509434.00000000	-15487438.00000000	-7421609.00000000	-20727192.00000000	-23875948.00000000	-9919892.00000000	-12596642.00000000	-15054121.00000000	-11472167.00000000	-12736957.00000000	-4396936.50000000	-10441900.00000000	-12628084.00000000	-11675522.00000000	-11005045.00000000	-11949137.00000000	-8388755.00000000	-5942438.50000000	-6607853.50000000	-8637213.00000000	-8949537.00000000	-19570946.00000000	-16307601.00000000	-12778477.00000000	-23092076.00000000	-14087014.00000000	-14699760.00000000	-23494094.00000000	-24575422.00000000	-19245072.00000000
244.12631226	-4209000.50000000	-15654287.00000000	-6522296.00000000	-11556227.00000000	-10015484.00000000	-11077267.00000000	-7269227.50000000	-9044782.00000000	-4760101.00000000	-17513624.00000000	-8106099.00000000	-7809046.50000000	-17580710.00000000	-17221504.00000000	-7716280.00000000	-7520915.50000000	-9749842.00000000	-9463554.00000000	-9131968.00000000	-9330040.00000000	-15230283.00000000	-6954780.50000000	-20373524.00000000	-23944146.00000000	-9998721.00000000	-12980210.00000000	-14955780.00000000	-11258270.00000000	-12562267.00000000	-4667807.00000000	-9497682.00000000	-13002430.00000000	-11948832.00000000	-10991189.00000000	-11760240.00000000	-8702054.00000000	-6081803.50000000	-6588548.00000000	-8105120.50000000	-8022377.00000000	-19270536.00000000	-15987897.00000000	-13355313.00000000	-23181150.00000000	-14152304.00000000	-14354214.00000000	-23520062.00000000	-24829448.00000000	-19471402.00000000
244.09448242	-4333275.00000000	-16301096.00000000	-6793249.00000000	-10994474.00000000	-9669247.00000000	-11144380.00000000	-7495258.00000000	-9167706.00000000	-4677423.50000000	-17592124.00000000	-7807048.50000000	-8218372.00000000	-17409650.00000000	-17497186.00000000	-8149204.00000000	-7722757.50000000	-9728085.00000000	-9127623.00000000	-9103172.00000000	-9322689.00000000	-14832538.00000000	-6459717.00000000	-20026862.00000000	-24020292.00000000	-10035307.00000000	-13217353.00000000	-14996650.00000000	-11117206.00000000	-12652845.00000000	-5020165.00000000	-8576299.00000000	-13392254.00000000	-11839622.00000000	-11021643.00000000	-11599275.00000000	-8957080.00000000	-6187373.50000000	-6542387.00000000	-7650578.00000000	-7016626.50000000	-19036438.00000000	-15825437.00000000	-13764778.00000000	-23350264.00000000	-14169146.00000000	-13972977.00000000	-23484942.00000000	-24893752.00000000	-19698386.00000000
244.06262207	-4499319.00000000	-16685825.00000000	-6955934.50000000	-10668520.00000000	-9290116.00000000	-11279995.00000000	-7562948.50000000	-9128589.00000000	-4753635.00000000	-17830688.00000000	-7488597.50000000	-8536931.00000000	-17191470.00000000	-17794070.00000000	-8430647.00000000	-7962267.50000000	-9721055.00000000	-8991170.00000000	-9120049.00000000	-9487001.00000000	-14409461.00000000	-6034279.50000000	-19708640.00000000	-24115626.00000000	-10036010.00000000	-13317647.00000000	-15176065.00000000	-10999564.00000000	-12985961.00000000	-5460386.00000000	-7837012.00000000	-13735156.00000000	-11392742.00000000	-11068482.00000000	-11459011.00000000	-9353118.00000000	-6288127.50000000	-6411911.00000000	-7367255.50000000	-6047625.50000000	-18926004.00000000	-15883278.00000000	-13922836.00000000	-23516256.00000000	-14128866.00000000	-13667455.00000000	-23276270.00000000	-24768076.00000000	-19911222.00000000
244.03079224	-4639422.50000000	-16741368.00000000	-6940222.50000000	-10580466.00000000	-8932473.00000000	-11422562.00000000	-7422898.00000000	-8887794.00000000	-4981532.50000000	-18132354.00000000	-7263710.50000000	-8715669.00000000	-16942430.00000000	-18075392.00000000	-8445315.00000000	-8247363.00000000	-9840873.00000000	-9073230.00000000	-9201378.00000000	-9764083.00000000	-14065362.00000000	-5778810.50000000	-19478232.00000000	-24213616.00000000	-10058195.00000000	-13336587.00000000	-15449058.00000000	-10927362.00000000	-13446082.00000000	-5955414.50000000	-7411922.50000000	-13990686.00000000	-10675392.00000000	-11138883.00000000	-11327217.00000000	-9991732.00000000	-6430525.00000000	-6191554.00000000	-7328466.00000000	-5168646.50000000	-18974562.00000000	-16146793.00000000	-13817693.00000000	-23586832.00000000	-13979969.00000000	-13546548.00000000	-22883518.00000000	-24525264.00000000	-20124186.00000000
243.99896240	-4707634.50000000	-16485044.00000000	-6783216.00000000	-10738002.00000000	-8653844.00000000	-11463184.00000000	-7134195.00000000	-8489642.00000000	-5262003.50000000	-18446410.00000000	-7176705.00000000	-8721126.00000000	-16690609.00000000	-18290126.00000000	-8144119.00000000	-8586510.00000000	-10162867.00000000	-9345155.00000000	-9359902.00000000	-10029398.00000000	-13845896.00000000	-5748682.00000000	-19359442.00000000	-24249430.00000000	-10184076.00000000	-13332636.00000000	-15741277.00000000	-10970872.00000000	-13896904.00000000	-6430400.00000000	-7374607.50000000	-14148303.00000000	-9777771.00000000	-11250348.00000000	-11164623.00000000	-10797598.00000000	-6636643.00000000	-5905729.50000000	-7551588.50000000	-4387359.50000000	-19175260.00000000	-16540618.00000000	-13510412.00000000	-23504962.00000000	-13697874.00000000	-13654891.00000000	-22398472.00000000	-24244616.00000000	-20364418.00000000
243.96711731	-4678562.50000000	-16007781.00000000	-6576854.50000000	-11105125.00000000	-8516015.00000000	-11296712.00000000	-6850456.00000000	-8054935.00000000	-5467952.00000000	-18761454.00000000	-7193803.00000000	-8545286.00000000	-16456387.00000000	-18369868.00000000	-7587968.50000000	-8969879.00000000	-10672387.00000000	-9730789.00000000	-9578794.00000000	-10146274.00000000	-13734297.00000000	-5914476.50000000	-19310766.00000000	-24145660.00000000	-10470266.00000000	-13324454.00000000	-15999596.00000000	-11162162.00000000	-14251628.00000000	-6815425.00000000	-7725595.50000000	-14213164.00000000	-8826265.00000000	-11392183.00000000	-10932803.00000000	-11586124.00000000	-6892202.00000000	-5593472.00000000	-7987385.50000000	-3708023.25000000	-19463174.00000000	-16968942.00000000	-13091079.00000000	-23262182.00000000	-13341166.00000000	-13965532.00000000	-21923826.00000000	-23983302.00000000	-20653852.00000000
243.93528748	-4539062.50000000	-15424767.00000000	-6400381.00000000	-11581642.00000000	-8577059.00000000	-10888841.00000000	-6738097.50000000	-7718508.00000000	-5526992.00000000	-19051174.00000000	-7256520.50000000	-8229325.50000000	-16240055.00000000	-18280514.00000000	-6914299.50000000	-9386853.00000000	-11281133.00000000	-10145876.00000000	-9811578.00000000	-10047139.00000000	-13697754.00000000	-6178097.50000000	-19271148.00000000	-23870884.00000000	-10907980.00000000	-13286370.00000000	-16218764.00000000	-11441785.00000000	-14498186.00000000	-7095076.50000000	-8387294.50000000	-14190973.00000000	-7967211.50000000	-11515307.00000000	-10646046.00000000	-12194921.00000000	-7159269.50000000	-5312364.00000000	-8548442.00000000	-3145260.50000000	-19741030.00000000	-17341720.00000000	-12630004.00000000	-22890274.00000000	-13021923.00000000	-14419884.00000000	-21482806.00000000	-23806986.00000000	-20998898.00000000
243.90342712	-4285468.00000000	-14819436.00000000	-6289940.50000000	-12053148.00000000	-8872854.00000000	-10304464.00000000	-6884236.50000000	-7557936.50000000	-5459417.00000000	-19253494.00000000	-7335193.50000000	-7866544.50000000	-16031381.00000000	-18078738.00000000	-6255855.00000000	-9844934.00000000	-11885404.00000000	-10536842.00000000	-10007975.00000000	-9767369.00000000	-13732996.00000000	-6437199.50000000	-19219450.00000000	-23462608.00000000	-11422168.00000000	-13182506.00000000	-16412955.00000000	-11698295.00000000	-14680858.00000000	-7309760.00000000	-9216144.00000000	-14088466.00000000	-7320918.50000000	-11570616.00000000	-10379628.00000000	-12556615.00000000	-7388544.50000000	-5134010.00000000	-9152218.00000000	-2704849.75000000	-19938194.00000000	-17584040.00000000	-12155395.00000000	-22452534.00000000	-12814091.00000000	-14970392.00000000	-21033966.00000000	-23810746.00000000	-21391254.00000000
243.87159729	-3929696.50000000	-14222749.00000000	-6252136.50000000	-12463451.00000000	-9388473.00000000	-9671393.00000000	-7267103.00000000	-7561311.00000000	-5347064.50000000	-19316864.00000000	-7428304.50000000	-7574933.00000000	-15831906.00000000	-17891088.00000000	-5691047.00000000	-10353425.00000000	-12401953.00000000	-10883425.00000000	-10140642.00000000	-9401827.00000000	-13856618.00000000	-6638253.50000000	-19176640.00000000	-22995388.00000000	-11902781.00000000	-13005423.00000000	-16573039.00000000	-11860737.00000000	-14867487.00000000	-7510106.00000000	-10043256.00000000	-13924905.00000000	-6948985.50000000	-11561218.00000000	-10211493.00000000	-12678863.00000000	-7523224.00000000	-5111529.00000000	-9741274.00000000	-2372694.25000000	-20055552.00000000	-17649360.00000000	-11661601.00000000	-22035124.00000000	-12695822.00000000	-15590954.00000000	-20577250.00000000	-24076600.00000000	-21813196.00000000
243.83975220	-3506751.25000000	-13635475.00000000	-6289189.00000000	-12833573.00000000	-10032029.00000000	-9110194.00000000	-7800454.00000000	-7650783.50000000	-5265605.50000000	-19259730.00000000	-7523080.00000000	-7455947.50000000	-15665525.00000000	-17820590.00000000	-5267076.50000000	-10886590.00000000	-12760520.00000000	-11172852.00000000	-10205103.00000000	-9035004.00000000	-14054789.00000000	-6777628.00000000	-19156596.00000000	-22528664.00000000	-12241023.00000000	-12786814.00000000	-16667678.00000000	-11951322.00000000	-15119638.00000000	-7711966.00000000	-10732975.00000000	-13736714.00000000	-6862121.50000000	-11546984.00000000	-10157308.00000000	-12594349.00000000	-7508050.50000000	-5243013.50000000	-10274007.00000000	-2134339.75000000	-20159684.00000000	-17539610.00000000	-11136445.00000000	-21724906.00000000	-12582378.00000000	-16254857.00000000	-20222026.00000000	-24607694.00000000	-22237608.00000000
243.80790710	-3073494.25000000	-13063467.00000000	-6402293.00000000	-13211334.00000000	-10638351.00000000	-8684644.00000000	-8393324.00000000	-7742113.00000000	-5235745.00000000	-19169174.00000000	-7576046.50000000	-7554984.50000000	-15563713.00000000	-17880378.00000000	-5049870.00000000	-11377175.00000000	-12891218.00000000	-11381791.00000000	-10194413.00000000	-8713338.00000000	-14265663.00000000	-6871213.00000000	-19129508.00000000	-22082616.00000000	-12355378.00000000	-12579819.00000000	-16686256.00000000	-12053255.00000000	-15464492.00000000	-7889890.50000000	-11223183.00000000	-13563632.00000000	-7046803.50000000	-11586083.00000000	-10173061.00000000	-12342434.00000000	-7311589.00000000	-5469942.00000000	-10712761.00000000	-1996893.25000000	-20331516.00000000	-17309720.00000000	-10593057.00000000	-21575480.00000000	-12404339.00000000	-16907986.00000000	-20120268.00000000	-25314704.00000000	-22617896.00000000
243.77607727	-2694483.50000000	-12535778.00000000	-6571493.00000000	-13607870.00000000	-11023298.00000000	-8398342.00000000	-8967571.00000000	-7798830.50000000	-5221733.50000000	-19133108.00000000	-7540226.50000000	-7836745.00000000	-15537391.00000000	-18022098.00000000	-5122454.50000000	-11761803.00000000	-12745811.00000000	-11483870.00000000	-10080864.00000000	-8469202.00000000	-14430264.00000000	-6939317.00000000	-19038292.00000000	-21654612.00000000	-12209109.00000000	-12433806.00000000	-16664198.00000000	-12235069.00000000	-15872520.00000000	-8002787.50000000	-11519218.00000000	-13422928.00000000	-7471970.00000000	-11672786.00000000	-10219994.00000000	-11975498.00000000	-6946772.00000000	-5713032.50000000	-11032919.00000000	-1976738.25000000	-20603512.00000000	-17043256.00000000	-10087847.00000000	-21588926.00000000	-12145102.00000000	-17468478.00000000	-20324542.00000000	-26059894.00000000	-22881458.00000000
243.74423218	-2421264.50000000	-12098262.00000000	-6739638.50000000	-13983446.00000000	-11069693.00000000	-8219528.00000000	-9441225.00000000	-7842978.00000000	-5162646.00000000	-19173104.00000000	-7404948.50000000	-8198642.50000000	-15561187.00000000	-18209640.00000000	-5517526.50000000	-12036890.00000000	-12339748.00000000	-11464517.00000000	-9833937.00000000	-8346864.00000000	-14555665.00000000	-7017853.00000000	-18845000.00000000	-21248926.00000000	-11817291.00000000	-12374964.00000000	-16651823.00000000	-12504637.00000000	-16261348.00000000	-8021415.50000000	-11653028.00000000	-13291738.00000000	-8070815.00000000	-11741314.00000000	-10309714.00000000	-11551214.00000000	-6468812.00000000	-5906616.50000000	-11243495.00000000	-2062965.87500000	-20920870.00000000	-16816684.00000000	-9707713.00000000	-21732156.00000000	-11812095.00000000	-17861370.00000000	-20723592.00000000	-26701548.00000000	-22948738.00000000
243.71240234	-2277042.00000000	-11790907.00000000	-6827222.00000000	-14289469.00000000	-10787219.00000000	-8105345.00000000	-9729864.00000000	-7914352.50000000	-5006177.00000000	-19238802.00000000	-7203458.00000000	-8533159.00000000	-15583408.00000000	-18443018.00000000	-6156807.00000000	-12263642.00000000	-11766295.00000000	-11319446.00000000	-9464228.00000000	-8390773.00000000	-14706784.00000000	-7163522.50000000	-18560230.00000000	-20887320.00000000	-11235030.00000000	-12391607.00000000	-16659111.00000000	-12821528.00000000	-16536727.00000000	-7940527.50000000	-11649119.00000000	-13113182.00000000	-8729376.00000000	-11730700.00000000	-10474475.00000000	-11110322.00000000	-5950577.50000000	-6001143.00000000	-11392377.00000000	-2203113.75000000	-21149390.00000000	-16680815.00000000	-9529742.00000000	-21969130.00000000	-11397910.00000000	-18065056.00000000	-21128518.00000000	-27113928.00000000	-22780698.00000000
243.68054199	-2253543.75000000	-11618901.00000000	-6775927.50000000	-14520466.00000000	-10297247.00000000	-8016338.50000000	-9787395.00000000	-8009899.00000000	-4731993.50000000	-19255270.00000000	-6986102.00000000	-8799527.00000000	-15553893.00000000	-18717796.00000000	-6873350.50000000	-12508753.00000000	-11156760.00000000	-11042059.00000000	-9047522.00000000	-8610463.00000000	-14925584.00000000	-7425950.50000000	-18236942.00000000	-20594414.00000000	-10531362.00000000	-12429768.00000000	-16635815.00000000	-13138593.00000000	-16647199.00000000	-7779758.50000000	-11523155.00000000	-12825112.00000000	-9309841.00000000	-11634810.00000000	-10703841.00000000	-10676829.00000000	-5456726.00000000	-5951349.50000000	-11543972.00000000	-2332911.75000000	-21132922.00000000	-16663116.00000000	-9582964.00000000	-22270636.00000000	-10891344.00000000	-18130852.00000000	-21418986.00000000	-27218684.00000000	-22419396.00000000
243.64871216	-2316634.25000000	-11535066.00000000	-6590597.00000000	-14725469.00000000	-9752738.00000000	-7927646.00000000	-9645689.00000000	-8056201.00000000	-4367921.00000000	-19169994.00000000	-6793163.50000000	-9034815.00000000	-15450732.00000000	-18996438.00000000	-7507164.00000000	-12772758.00000000	-10613725.00000000	-10627927.00000000	-8693074.00000000	-8965505.00000000	-15169070.00000000	-7804617.00000000	-17945412.00000000	-20377850.00000000	-9772476.00000000	-12416549.00000000	-16501912.00000000	-13431958.00000000	-16610961.00000000	-7581527.00000000	-11297644.00000000	-12395044.00000000	-9702083.00000000	-11487033.00000000	-10932809.00000000	-10292054.00000000	-5033475.50000000	-5728837.00000000	-11745397.00000000	-2418147.50000000	-20775452.00000000	-16772279.00000000	-9843970.00000000	-22594294.00000000	-10329761.00000000	-18156790.00000000	-21601834.00000000	-27045272.00000000	-21977312.00000000
243.61688232	-2415739.00000000	-11457225.00000000	-6348016.00000000	-14967009.00000000	-9255569.00000000	-7837903.00000000	-9401097.00000000	-7945053.50000000	-3996022.25000000	-18965718.00000000	-6649423.00000000	-9286396.00000000	-15289750.00000000	-19241954.00000000	-7988143.50000000	-12971043.00000000	-10168221.00000000	-10104187.00000000	-8471551.00000000	-9389080.00000000	-15340518.00000000	-8232778.50000000	-17751130.00000000	-20221240.00000000	-9027934.00000000	-12313285.00000000	-16192310.00000000	-13704336.00000000	-16495068.00000000	-7405494.00000000	-11002967.00000000	-11842970.00000000	-9869114.00000000	-11315669.00000000	-11100684.00000000	-10040579.00000000	-4710134.00000000	-5360544.50000000	-12004372.00000000	-2463067.00000000	-20099218.00000000	-16992172.00000000	-10265592.00000000	-22870646.00000000	-9831591.00000000	-18235112.00000000	-21743696.00000000	-26756186.00000000	-21570766.00000000
243.58502197	-2499680.50000000	-11323136.00000000	-6165467.00000000	-15263365.00000000	-8829615.00000000	-7767763.00000000	-9151319.00000000	-7608804.00000000	-3732965.00000000	-18651156.00000000	-6570006.50000000	-9539065.00000000	-15109526.00000000	-19465744.00000000	-8337903.50000000	-12985579.00000000	-9787177.00000000	-9553225.00000000	-8362667.50000000	-9827059.00000000	-15380938.00000000	-8606738.00000000	-17704124.00000000	-20090438.00000000	-8382033.50000000	-12161879.00000000	-15680951.00000000	-13967850.00000000	-16365672.00000000	-7315520.50000000	-10659128.00000000	-11241810.00000000	-9852724.00000000	-11137209.00000000	-11209263.00000000	-10023022.00000000	-4500320.00000000	-4943197.50000000	-12289634.00000000	-2481417.25000000	-19237024.00000000	-17276294.00000000	-10805439.00000000	-23029050.00000000	-9565665.00000000	-18411976.00000000	-21875818.00000000	-26567594.00000000	-21247342.00000000
243.55319214	-2542212.00000000	-11143234.00000000	-6148854.50000000	-15568010.00000000	-8454727.00000000	-7747485.50000000	-8941237.00000000	-7074123.50000000	-3679074.75000000	-18253228.00000000	-6561433.50000000	-9723675.00000000	-14939128.00000000	-19713798.00000000	-8605553.00000000	-12746664.00000000	-9414824.00000000	-9092807.00000000	-8272467.50000000	-10257082.00000000	-15319145.00000000	-8836535.00000000	-17837606.00000000	-19945656.00000000	-7922389.00000000	-12075531.00000000	-14987669.00000000	-14215235.00000000	-16244057.00000000	-7358787.00000000	-10267663.00000000	-10695516.00000000	-9733058.00000000	-10990739.00000000	-11308249.00000000	-10289052.00000000	-4401155.00000000	-4592094.50000000	-12548247.00000000	-2468213.00000000	-18361484.00000000	-17558416.00000000	-11426585.00000000	-23046180.00000000	-9674720.00000000	-18678796.00000000	-21981102.00000000	-26603708.00000000	-20966880.00000000
243.52134705	-2565951.25000000	-10996592.00000000	-6350104.50000000	-15808961.00000000	-8119797.50000000	-7804335.00000000	-8765985.00000000	-6447829.50000000	-3859171.00000000	-17813736.00000000	-6623747.00000000	-9799083.00000000	-14773630.00000000	-19998472.00000000	-8807067.00000000	-12285204.00000000	-9012740.00000000	-8815525.00000000	-8112491.00000000	-10674826.00000000	-15229840.00000000	-8882155.00000000	-18168552.00000000	-19756458.00000000	-7708604.00000000	-12170196.00000000	-14184312.00000000	-14395567.00000000	-16093191.00000000	-7542897.50000000	-9836461.00000000	-10302054.00000000	-9571924.00000000	-10950117.00000000	-11424662.00000000	-10792976.00000000	-4398763.50000000	-4355275.50000000	-12731813.00000000	-2404831.25000000	-17600846.00000000	-17777544.00000000	-12079521.00000000	-22964376.00000000	-10204772.00000000	-18982980.00000000	-22058612.00000000	-26814296.00000000	-20647130.00000000
243.48951721	-2640246.25000000	-10961698.00000000	-6754223.00000000	-15951276.00000000	-7848890.50000000	-7957454.00000000	-8617547.00000000	-5846951.50000000	-4194398.50000000	-17379654.00000000	-6766598.00000000	-9808156.00000000	-14584964.00000000	-20262800.00000000	-8915126.00000000	-11721389.00000000	-8578592.00000000	-8737342.00000000	-7878092.00000000	-11066130.00000000	-15151262.00000000	-8762602.00000000	-18688268.00000000	-19517824.00000000	-7752442.50000000	-12492965.00000000	-13394611.00000000	-14421578.00000000	-15841609.00000000	-7824505.00000000	-9417618.00000000	-10115870.00000000	-9387039.00000000	-11077752.00000000	-11519981.00000000	-11414802.00000000	-4479946.50000000	-4179714.00000000	-12822863.00000000	-2290351.50000000	-17000102.00000000	-17898196.00000000	-12698012.00000000	-22854358.00000000	-11080690.00000000	-19240844.00000000	-22166348.00000000	-27031538.00000000	-20230892.00000000
243.45765686	-2843584.50000000	-11040774.00000000	-7298788.00000000	-16016212.00000000	-7682588.00000000	-8213618.50000000	-8518856.00000000	-5333295.00000000	-4528861.00000000	-16990836.00000000	-7028485.50000000	-9839963.00000000	-14365499.00000000	-20429096.00000000	-8888905.00000000	-11199862.00000000	-8147046.00000000	-8801734.00000000	-7662416.50000000	-11397094.00000000	-15048322.00000000	-8548778.00000000	-19340546.00000000	-19256648.00000000	-8025251.00000000	-13007844.00000000	-12770398.00000000	-14222839.00000000	-15434409.00000000	-8127560.50000000	-9113389.00000000	-10128789.00000000	-9177082.00000000	-11366623.00000000	-11526653.00000000	-12027342.00000000	-4638065.00000000	-3977598.25000000	-12848858.00000000	-2167385.25000000	-16545426.00000000	-17913872.00000000	-13224871.00000000	-22757510.00000000	-12134771.00000000	-19354160.00000000	-22375988.00000000	-27102702.00000000	-19724874.00000000
243.42582703	-3215960.25000000	-11149030.00000000	-7910484.00000000	-16033431.00000000	-7632637.00000000	-8557726.00000000	-8509400.00000000	-4904670.00000000	-4701318.00000000	-16681938.00000000	-7467511.00000000	-9943807.00000000	-14161382.00000000	-20479882.00000000	-8706814.00000000	-10814254.00000000	-7781409.50000000	-8934460.00000000	-7594039.50000000	-11636463.00000000	-14847847.00000000	-8347709.00000000	-20009062.00000000	-19013636.00000000	-8469971.00000000	-13640293.00000000	-12445282.00000000	-13811226.00000000	-14881815.00000000	-8393903.00000000	-9030235.00000000	-10283040.00000000	-8962913.00000000	-11737392.00000000	-11426232.00000000	-12552285.00000000	-4864332.50000000	-3735009.25000000	-12870378.00000000	-2119268.75000000	-16218845.00000000	-17838008.00000000	-13644581.00000000	-22663926.00000000	-13170356.00000000	-19241154.00000000	-22684906.00000000	-26974788.00000000	-19196348.00000000
243.39399719	-3740953.25000000	-11180129.00000000	-8534454.00000000	-15981676.00000000	-7651060.00000000	-8951266.00000000	-8603031.00000000	-4539740.50000000	-4626983.00000000	-16498682.00000000	-8113281.00000000	-10093013.00000000	-14052759.00000000	-20479942.00000000	-8381426.00000000	-10568868.00000000	-7552636.00000000	-9096650.00000000	-7746107.50000000	-11788637.00000000	-14501827.00000000	-8271487.50000000	-20547038.00000000	-18808706.00000000	-8994826.00000000	-14325077.00000000	-12489419.00000000	-13293514.00000000	-14266800.00000000	-8634454.00000000	-9212320.00000000	-10511838.00000000	-8790345.00000000	-12088604.00000000	-11288938.00000000	-12967944.00000000	-5133704.50000000	-3549700.75000000	-12943840.00000000	-2238199.75000000	-16030798.00000000	-17695692.00000000	-13986296.00000000	-22542146.00000000	-14029608.00000000	-18875338.00000000	-22987564.00000000	-26684338.00000000	-18743816.00000000
243.36215210	-4366673.00000000	-11087780.00000000	-9138004.00000000	-15794541.00000000	-7649333.00000000	-9355347.00000000	-8767223.00000000	-4245322.00000000	-4346962.50000000	-16501740.00000000	-8917532.00000000	-10227244.00000000	-14094143.00000000	-20519586.00000000	-7958353.00000000	-10399194.00000000	-7501063.50000000	-9292631.00000000	-8083607.50000000	-11895143.00000000	-14023864.00000000	-8388919.00000000	-20851320.00000000	-18622772.00000000	-9468050.00000000	-15011193.00000000	-12884660.00000000	-12802967.00000000	-13698242.00000000	-8929432.00000000	-9608779.00000000	-10782700.00000000	-8689531.00000000	-12337535.00000000	-11235353.00000000	-13276894.00000000	-5401909.50000000	-3551480.50000000	-13081522.00000000	-2578864.75000000	-16005220.00000000	-17520270.00000000	-14288676.00000000	-22382694.00000000	-14635340.00000000	-18305400.00000000	-23148364.00000000	-26305926.00000000	-18458380.00000000
243.33030701	-5034471.50000000	-10914188.00000000	-9692363.00000000	-15436833.00000000	-7562405.00000000	-9766973.00000000	-8947174.00000000	-4060305.75000000	-4014207.00000000	-16736091.00000000	-9757064.00000000	-10310682.00000000	-14279880.00000000	-20644418.00000000	-7505527.50000000	-10229260.00000000	-7599716.50000000	-9537393.00000000	-8483173.00000000	-11989460.00000000	-13483685.00000000	-8684739.00000000	-20929646.00000000	-18423142.00000000	-9754373.00000000	-15636727.00000000	-13522792.00000000	-12405452.00000000	-13244882.00000000	-9360461.00000000	-10101364.00000000	-11113763.00000000	-8648540.00000000	-12420594.00000000	-11354383.00000000	-13468594.00000000	-5619089.50000000	-3783277.00000000	-13239860.00000000	-3119225.25000000	-16139066.00000000	-17350308.00000000	-14557266.00000000	-22212260.00000000	-14991831.00000000	-17637850.00000000	-23109504.00000000	-25919824.00000000	-18384544.00000000
243.29846191	-5684768.50000000	-10749647.00000000	-10155368.00000000	-14968648.00000000	-7401180.50000000	-10227269.00000000	-9109546.00000000	-4019141.50000000	-3813990.00000000	-17183270.00000000	-10498491.00000000	-10341982.00000000	-14575568.00000000	-20837558.00000000	-7096575.00000000	-10018567.00000000	-7757945.00000000	-9823615.00000000	-8806085.00000000	-12047809.00000000	-12974130.00000000	-9063886.00000000	-20897764.00000000	-18214160.00000000	-9790613.00000000	-16119888.00000000	-14229443.00000000	-12071132.00000000	-12906791.00000000	-9925794.00000000	-10570197.00000000	-11549422.00000000	-8645597.00000000	-12290354.00000000	-11643816.00000000	-13505688.00000000	-5749322.50000000	-4164450.00000000	-13348205.00000000	-3752748.25000000	-16380502.00000000	-17222046.00000000	-14755223.00000000	-22072494.00000000	-15154881.00000000	-16993752.00000000	-22931914.00000000	-25600824.00000000	-18495252.00000000
243.26663208	-6250890.00000000	-10665464.00000000	-10476713.00000000	-14518897.00000000	-7233776.00000000	-10776728.00000000	-9261435.00000000	-4117061.25000000	-3860174.25000000	-17742478.00000000	-11071968.00000000	-10323380.00000000	-14976356.00000000	-21049750.00000000	-6795521.50000000	-9768719.00000000	-7879928.00000000	-10116323.00000000	-8971461.00000000	-12000742.00000000	-12570062.00000000	-9408488.00000000	-20898776.00000000	-18062084.00000000	-9637013.00000000	-16387719.00000000	-14821821.00000000	-11739086.00000000	-12642930.00000000	-10520154.00000000	-10948316.00000000	-12109560.00000000	-8699064.00000000	-11946137.00000000	-12014240.00000000	-13338036.00000000	-5784414.50000000	-4567755.50000000	-13359583.00000000	-4325533.00000000	-16647870.00000000	-17160970.00000000	-14836367.00000000	-21989744.00000000	-15194534.00000000	-16468690.00000000	-22736858.00000000	-25403800.00000000	-18700974.00000000
243.23477173	-6674101.50000000	-10673879.00000000	-10623988.00000000	-14188151.00000000	-7102738.50000000	-11391403.00000000	-9428042.00000000	-4310394.00000000	-4134073.25000000	-18264268.00000000	-11489145.00000000	-10237210.00000000	-15512813.00000000	-21229380.00000000	-6651968.00000000	-9503943.00000000	-7934625.50000000	-10371501.00000000	-8985504.00000000	-11814334.00000000	-12295762.00000000	-9646758.00000000	-21009252.00000000	-18061968.00000000	-9447289.00000000	-16415881.00000000	-15185096.00000000	-11403683.00000000	-12416457.00000000	-11004824.00000000	-11228305.00000000	-12746920.00000000	-8853216.00000000	-11466732.00000000	-12346904.00000000	-12927709.00000000	-5748537.00000000	-4920599.00000000	-13286613.00000000	-4703559.50000000	-16867748.00000000	-17179114.00000000	-14788823.00000000	-21957448.00000000	-15165970.00000000	-16114111.00000000	-22614614.00000000	-25347590.00000000	-18894536.00000000
243.20294189	-6940680.50000000	-10737445.00000000	-10606756.00000000	-13978195.00000000	-6961555.50000000	-11967222.00000000	-9613678.00000000	-4544921.00000000	-4509112.00000000	-18611850.00000000	-11795379.00000000	-10050663.00000000	-16186377.00000000	-21328120.00000000	-6704251.00000000	-9261660.00000000	-7967270.00000000	-10559866.00000000	-8919455.00000000	-11564600.00000000	-12119098.00000000	-9777891.00000000	-21207020.00000000	-18270696.00000000	-9376223.00000000	-16239593.00000000	-15317611.00000000	-11130629.00000000	-12211149.00000000	-11304099.00000000	-11423155.00000000	-13344203.00000000	-9093917.00000000	-10985449.00000000	-12561426.00000000	-12266752.00000000	-5692543.50000000	-5225618.50000000	-13197271.00000000	-4829764.50000000	-16993186.00000000	-17279966.00000000	-14648686.00000000	-21933596.00000000	-15089089.00000000	-15938366.00000000	-22586104.00000000	-25415670.00000000	-19002276.00000000
243.17111206	-7096490.00000000	-10809692.00000000	-10477162.00000000	-13812624.00000000	-6705759.00000000	-12378587.00000000	-9783696.00000000	-4780001.50000000	-4841464.50000000	-18704980.00000000	-12009432.00000000	-9732822.00000000	-16908646.00000000	-21302086.00000000	-6975557.50000000	-9103078.00000000	-8035075.50000000	-10684900.00000000	-8861929.00000000	-11415324.00000000	-11980393.00000000	-9838580.00000000	-21413616.00000000	-18664968.00000000	-9503682.00000000	-15925928.00000000	-15303617.00000000	-10992092.00000000	-12019505.00000000	-11437655.00000000	-11519599.00000000	-13757503.00000000	-9297270.00000000	-10610327.00000000	-12648251.00000000	-11384909.00000000	-5673341.50000000	-5497084.50000000	-13173140.00000000	-4735107.50000000	-16994320.00000000	-17464398.00000000	-14474324.00000000	-21850468.00000000	-14938822.00000000	-15917894.00000000	-22635588.00000000	-25569068.00000000	-19006040.00000000
243.13926697	-7204513.50000000	-10868490.00000000	-10304001.00000000	-13613874.00000000	-6277014.50000000	-12561103.00000000	-9880524.00000000	-4990705.00000000	-5057901.00000000	-18531400.00000000	-12107089.00000000	-9272092.00000000	-17526000.00000000	-21130798.00000000	-7454749.00000000	-9114186.00000000	-8135720.50000000	-10788382.00000000	-8876897.00000000	-11500617.00000000	-11837119.00000000	-9852883.00000000	-21558868.00000000	-19159686.00000000	-9828549.00000000	-15532667.00000000	-15236198.00000000	-10997478.00000000	-11838087.00000000	-11467476.00000000	-11469736.00000000	-13880058.00000000	-9300680.00000000	-10366342.00000000	-12651353.00000000	-10357303.00000000	-5721311.50000000	-5703162.50000000	-13257276.00000000	-4501783.00000000	-16852916.00000000	-17728468.00000000	-14311504.00000000	-21637472.00000000	-14658367.00000000	-16011306.00000000	-22755866.00000000	-25752562.00000000	-18933064.00000000
243.10742188	-7276888.00000000	-10912877.00000000	-10133883.00000000	-13355566.00000000	-5738085.50000000	-12542289.00000000	-9857182.00000000	-5159697.50000000	-5183238.50000000	-18144864.00000000	-12049333.00000000	-8696082.00000000	-17916682.00000000	-20842060.00000000	-8077327.50000000	-9367933.00000000	-8213369.50000000	-10933065.00000000	-8983081.00000000	-11815319.00000000	-11689933.00000000	-9814612.00000000	-21612100.00000000	-19670326.00000000	-10310895.00000000	-15086784.00000000	-15164813.00000000	-11090117.00000000	-11682370.00000000	-11424504.00000000	-11235034.00000000	-13686962.00000000	-9044851.00000000	-10216324.00000000	-12625325.00000000	-9312380.00000000	-5817518.00000000	-5784465.00000000	-13424419.00000000	-4210169.00000000	-16586902.00000000	-18052164.00000000	-14182949.00000000	-21252420.00000000	-14201626.00000000	-16170348.00000000	-22951356.00000000	-25898520.00000000	-18837160.00000000
243.07557678	-7253666.00000000	-10928205.00000000	-9960462.00000000	-13054797.00000000	-5247082.50000000	-12398891.00000000	-9703708.00000000	-5278702.00000000	-5305281.50000000	-17660144.00000000	-11809382.00000000	-8082720.00000000	-18064948.00000000	-20510968.00000000	-8732885.00000000	-9864453.00000000	-8242045.00000000	-11161111.00000000	-9155759.00000000	-12215009.00000000	-11572791.00000000	-9707529.00000000	-21572994.00000000	-20168476.00000000	-10905990.00000000	-14596473.00000000	-15109645.00000000	-11199565.00000000	-11589866.00000000	-11290772.00000000	-10846399.00000000	-13238991.00000000	-8637396.00000000	-10129326.00000000	-12606952.00000000	-8418365.00000000	-5907210.00000000	-5722748.00000000	-13593101.00000000	-3906176.75000000	-16279905.00000000	-18388168.00000000	-14103982.00000000	-20702826.00000000	-13582486.00000000	-16344544.00000000	-23208136.00000000	-25949344.00000000	-18786348.00000000
243.04374695	-7059884.00000000	-10860137.00000000	-9722923.00000000	-12737922.00000000	-4963173.50000000	-12192514.00000000	-9454874.00000000	-5358742.50000000	-5517650.50000000	-17225916.00000000	-11369439.00000000	-7537157.00000000	-18044964.00000000	-20221940.00000000	-9305201.00000000	-10500996.00000000	-8290853.00000000	-11457480.00000000	-9346524.00000000	-12519609.00000000	-11523748.00000000	-9526288.00000000	-21454488.00000000	-20688882.00000000	-11566853.00000000	-14084325.00000000	-15102750.00000000	-11285388.00000000	-11586283.00000000	-11042401.00000000	-10420905.00000000	-12655444.00000000	-8266025.50000000	-10121303.00000000	-12618682.00000000	-7830087.50000000	-5947777.00000000	-5579946.00000000	-13672861.00000000	-3604015.25000000	-16063406.00000000	-18663506.00000000	-14096585.00000000	-20041568.00000000	-12890200.00000000	-16482962.00000000	-23482886.00000000	-25889134.00000000	-18844234.00000000
243.01191711	-6690174.00000000	-10637019.00000000	-9346012.00000000	-12420977.00000000	-4971209.50000000	-11946879.00000000	-9178877.00000000	-5429980.00000000	-5878045.50000000	-16961974.00000000	-10711663.00000000	-7139718.00000000	-17948410.00000000	-20017216.00000000	-9719221.00000000	-11103503.00000000	-8486514.00000000	-11759276.00000000	-9512227.00000000	-12620761.00000000	-11564318.00000000	-9273954.00000000	-21281746.00000000	-21280746.00000000	-12237507.00000000	-13612775.00000000	-15187137.00000000	-11339075.00000000	-11642830.00000000	-10694447.00000000	-10108573.00000000	-12079456.00000000	-8053956.50000000	-10239981.00000000	-12684817.00000000	-7619834.50000000	-5951965.50000000	-5468979.00000000	-13616450.00000000	-3312371.75000000	-16041295.00000000	-18798824.00000000	-14182041.00000000	-19345190.00000000	-12251384.00000000	-16541215.00000000	-23730988.00000000	-25741298.00000000	-19033706.00000000
242.98005676	-6239605.50000000	-10235022.00000000	-8805975.00000000	-12108392.00000000	-5268857.00000000	-11674948.00000000	-8950191.00000000	-5518960.00000000	-6391750.50000000	-16896920.00000000	-9843374.00000000	-6913880.50000000	-17839206.00000000	-19869556.00000000	-9960293.00000000	-11498559.00000000	-8901867.00000000	-12013408.00000000	-9635143.00000000	-12507798.00000000	-11696951.00000000	-8953838.00000000	-21098930.00000000	-21937200.00000000	-12860081.00000000	-13274854.00000000	-15367706.00000000	-11368911.00000000	-11677823.00000000	-10297894.00000000	-10004792.00000000	-11645944.00000000	-8001387.00000000	-10527926.00000000	-12829858.00000000	-7751088.50000000	-5985549.50000000	-5489876.00000000	-13441928.00000000	-3058448.25000000	-16219359.00000000	-18739354.00000000	-14362992.00000000	-18697650.00000000	-11765584.00000000	-16494470.00000000	-23935900.00000000	-25521014.00000000	-19306560.00000000
242.94822693	-5853107.50000000	-9727901.00000000	-8174285.50000000	-11793718.00000000	-5789659.00000000	-11412087.00000000	-8815412.00000000	-5616574.50000000	-7013702.50000000	-16971410.00000000	-8848761.00000000	-6850022.00000000	-17766260.00000000	-19699968.00000000	-10053845.00000000	-11577228.00000000	-9485166.00000000	-12226838.00000000	-9716392.00000000	-12220013.00000000	-11909580.00000000	-8585009.00000000	-20961916.00000000	-22559066.00000000	-13389336.00000000	-13147474.00000000	-15581913.00000000	-11398318.00000000	-11613204.00000000	-9900858.00000000	-10094617.00000000	-11446165.00000000	-8041695.00000000	-10997748.00000000	-13055626.00000000	-8127297.50000000	-6119997.50000000	-5683861.50000000	-13213076.00000000	-2889414.75000000	-16512125.00000000	-18484672.00000000	-14617675.00000000	-18184638.00000000	-11464551.00000000	-16345050.00000000	-24099346.00000000	-25200748.00000000	-19560956.00000000
242.91638184	-5640755.00000000	-9264632.00000000	-7593069.00000000	-11461226.00000000	-6427422.00000000	-11214415.00000000	-8770195.00000000	-5664276.00000000	-7662488.00000000	-17118392.00000000	-7905328.50000000	-6950003.00000000	-17788490.00000000	-19429916.00000000	-10025531.00000000	-11322068.00000000	-10103018.00000000	-12448939.00000000	-9747665.00000000	-11793975.00000000	-12176007.00000000	-8231008.50000000	-20913018.00000000	-22993610.00000000	-13797715.00000000	-13240329.00000000	-15741001.00000000	-11465325.00000000	-11434319.00000000	-9523532.00000000	-10263343.00000000	-11492948.00000000	-8116307.50000000	-11615970.00000000	-13323318.00000000	-8672223.00000000	-6383315.50000000	-6023852.50000000	-12999026.00000000	-2851109.50000000	-16822930.00000000	-18102152.00000000	-14908008.00000000	-17879564.00000000	-11320289.00000000	-16116465.00000000	-24208048.00000000	-24747292.00000000	-19709482.00000000
242.88455200	-5627422.00000000	-8981805.00000000	-7190605.00000000	-11100803.00000000	-7064936.00000000	-11125044.00000000	-8764977.00000000	-5574946.00000000	-8241880.50000000	-17345424.00000000	-7218795.50000000	-7227556.00000000	-17961622.00000000	-19033334.00000000	-9874116.00000000	-10800991.00000000	-10648803.00000000	-12697749.00000000	-9694563.00000000	-11253041.00000000	-12456003.00000000	-7996998.50000000	-20957472.00000000	-23131732.00000000	-14071926.00000000	-13485128.00000000	-15806944.00000000	-11595003.00000000	-11196898.00000000	-9173359.00000000	-10353695.00000000	-11712974.00000000	-8187912.50000000	-12288724.00000000	-13565087.00000000	-9360257.00000000	-6749059.50000000	-6430519.50000000	-12848249.00000000	-2963895.50000000	-17115752.00000000	-17711862.00000000	-15183113.00000000	-17809868.00000000	-11280741.00000000	-15843173.00000000	-24230376.00000000	-24199250.00000000	-19742754.00000000
242.85269165	-5764543.00000000	-8923644.00000000	-7005565.00000000	-10729164.00000000	-7616658.50000000	-11140816.00000000	-8737266.00000000	-5279489.00000000	-8661726.00000000	-17727474.00000000	-6909344.50000000	-7659853.50000000	-18295786.00000000	-18550808.00000000	-9575021.00000000	-10140226.00000000	-11105078.00000000	-12911819.00000000	-9519910.00000000	-10627711.00000000	-12705045.00000000	-7974992.50000000	-21066228.00000000	-22990142.00000000	-14213192.00000000	-13780584.00000000	-15823697.00000000	-11759025.00000000	-10981852.00000000	-8878019.00000000	-10228583.00000000	-11988159.00000000	-8219488.50000000	-12870031.00000000	-13718456.00000000	-10167733.00000000	-7163531.00000000	-6804927.00000000	-12789815.00000000	-3217875.00000000	-17411834.00000000	-17441346.00000000	-15373318.00000000	-17929446.00000000	-11293324.00000000	-15569848.00000000	-24159098.00000000	-23685916.00000000	-19725130.00000000
242.82086182	-5980376.50000000	-9037963.00000000	-6986227.50000000	-10393269.00000000	-8058441.00000000	-11208022.00000000	-8647096.00000000	-4771517.00000000	-8852554.00000000	-18310116.00000000	-6939688.00000000	-8161127.50000000	-18732046.00000000	-18054838.00000000	-9106307.00000000	-9482254.00000000	-11508850.00000000	-12989107.00000000	-9232363.00000000	-9971052.00000000	-12893673.00000000	-8178952.00000000	-21208260.00000000	-22707234.00000000	-14237934.00000000	-14057267.00000000	-15872964.00000000	-11875947.00000000	-10845266.00000000	-8696644.00000000	-9818756.00000000	-12225729.00000000	-8185179.00000000	-13211694.00000000	-13756579.00000000	-11007082.00000000	-7579812.50000000	-7073026.00000000	-12843165.00000000	-3588313.50000000	-17731606.00000000	-17368710.00000000	-15396331.00000000	-18136646.00000000	-11301589.00000000	-15356349.00000000	-24049142.00000000	-23346472.00000000	-19723588.00000000
242.78903198	-6226174.00000000	-9243375.00000000	-7056248.00000000	-10147458.00000000	-8407494.00000000	-11252092.00000000	-8493552.00000000	-4123567.50000000	-8776953.00000000	-19024082.00000000	-7145295.00000000	-8628389.00000000	-19163976.00000000	-17594608.00000000	-8472250.00000000	-8938696.00000000	-11874113.00000000	-12878593.00000000	-8909686.00000000	-9352787.00000000	-13023354.00000000	-8532663.00000000	-21388086.00000000	-22453436.00000000	-14163336.00000000	-14305371.00000000	-16007178.00000000	-11874302.00000000	-10803336.00000000	-8696256.00000000	-9152307.00000000	-12401837.00000000	-8109103.00000000	-13226862.00000000	-13696603.00000000	-11728347.00000000	-7973617.00000000	-7222282.00000000	-13011354.00000000	-4049659.25000000	-18056970.00000000	-17488470.00000000	-15193463.00000000	-18336858.00000000	-11237253.00000000	-15268490.00000000	-23994390.00000000	-23230472.00000000	-19739014.00000000
242.75717163	-6489395.50000000	-9495419.00000000	-7173584.00000000	-10026508.00000000	-8668207.00000000	-11225500.00000000	-8310182.50000000	-3465473.75000000	-8442236.00000000	-19704838.00000000	-7340248.50000000	-9014800.00000000	-19485888.00000000	-17168438.00000000	-7705638.50000000	-8560483.00000000	-12159526.00000000	-12628415.00000000	-8664930.00000000	-8840853.00000000	-13122604.00000000	-8922122.00000000	-21651754.00000000	-22329922.00000000	-13980142.00000000	-14541780.00000000	-16226245.00000000	-11764883.00000000	-10849418.00000000	-8915646.00000000	-8354054.00000000	-12543153.00000000	-8067599.50000000	-12915230.00000000	-13589117.00000000	-12199346.00000000	-8339111.00000000	-7302795.50000000	-13261235.00000000	-4571075.00000000	-18349616.00000000	-17724380.00000000	-14773792.00000000	-18495848.00000000	-11038646.00000000	-15350900.00000000	-24056850.00000000	-23288048.00000000	-19708156.00000000
242.72534180	-6772483.50000000	-9787754.00000000	-7327804.50000000	-10040016.00000000	-8808184.00000000	-11144479.00000000	-8150107.00000000	-2937406.00000000	-7906905.50000000	-20200260.00000000	-7416333.50000000	-9343919.00000000	-19637464.00000000	-16747443.00000000	-6852887.00000000	-8340468.00000000	-12306196.00000000	-12340956.00000000	-8582477.00000000	-8484049.00000000	-13221126.00000000	-9259791.00000000	-22047500.00000000	-22330988.00000000	-13644431.00000000	-14750396.00000000	-16502873.00000000	-11644029.00000000	-10975674.00000000	-9345093.00000000	-7596412.00000000	-12671234.00000000	-8133221.50000000	-12339609.00000000	-13498406.00000000	-12391160.00000000	-8673730.00000000	-7390281.00000000	-13518988.00000000	-5104566.00000000	-18586812.00000000	-17977794.00000000	-14220591.00000000	-18630852.00000000	-10696058.00000000	-15606149.00000000	-24220702.00000000	-23451516.00000000	-19571492.00000000
242.69349670	-7060194.00000000	-10098587.00000000	-7500316.00000000	-10186640.00000000	-8798290.00000000	-11084602.00000000	-8066854.50000000	-2642896.00000000	-7266679.50000000	-20463516.00000000	-7374896.50000000	-9650575.00000000	-19628234.00000000	-16323105.00000000	-5965121.00000000	-8238004.50000000	-12293725.00000000	-12085857.00000000	-8681566.00000000	-8302208.50000000	-13320876.00000000	-9505450.00000000	-22569418.00000000	-22377176.00000000	-13112532.00000000	-14854423.00000000	-16809618.00000000	-11617337.00000000	-11177541.00000000	-9929028.00000000	-7014979.00000000	-12768598.00000000	-8320208.00000000	-11596585.00000000	-13475977.00000000	-12393611.00000000	-8959547.00000000	-7542597.50000000	-13699287.00000000	-5592992.50000000	-18764926.00000000	-18171522.00000000	-13645113.00000000	-18750466.00000000	-10286664.00000000	-16004497.00000000	-24416672.00000000	-23704654.00000000	-19338160.00000000
242.66166687	-7306065.50000000	-10352877.00000000	-7652698.00000000	-10467821.00000000	-8669790.00000000	-11129381.00000000	-8091586.00000000	-2621753.50000000	-6620210.50000000	-20554470.00000000	-7292859.00000000	-9922769.00000000	-19532860.00000000	-15925323.00000000	-5110062.00000000	-8201402.00000000	-12151380.00000000	-11859875.00000000	-8932810.00000000	-8285564.00000000	-13392430.00000000	-9645978.00000000	-23137372.00000000	-22368678.00000000	-12396709.00000000	-14750531.00000000	-17115164.00000000	-11717712.00000000	-11438921.00000000	-10580157.00000000	-6645840.50000000	-12795339.00000000	-8591173.00000000	-10811066.00000000	-13530430.00000000	-12356012.00000000	-9151545.00000000	-7779982.50000000	-13748786.00000000	-6003806.50000000	-18876398.00000000	-18260506.00000000	-13126501.00000000	-18811784.00000000	-9957759.00000000	-16510999.00000000	-24582832.00000000	-24064796.00000000	-19085366.00000000
242.62980652	-7450659.50000000	-10454187.00000000	-7761332.00000000	-10889065.00000000	-8515531.00000000	-11305962.00000000	-8215891.00000000	-2847359.75000000	-6035884.50000000	-20570844.00000000	-7262844.00000000	-10108335.00000000	-19450218.00000000	-15590010.00000000	-4388557.50000000	-8181459.50000000	-11917268.00000000	-11622255.00000000	-9298741.00000000	-8402704.00000000	-13404806.00000000	-9679219.00000000	-23639600.00000000	-22215806.00000000	-11585896.00000000	-14380836.00000000	-17367016.00000000	-11894988.00000000	-11714190.00000000	-11196588.00000000	-6436704.00000000	-12729306.00000000	-8905568.00000000	-10128058.00000000	-13609957.00000000	-12406891.00000000	-9188487.00000000	-8085087.50000000	-13669460.00000000	-6358258.00000000	-18906470.00000000	-18221386.00000000	-12689041.00000000	-18745968.00000000	-9855338.00000000	-17094080.00000000	-24694812.00000000	-24518994.00000000	-18899142.00000000
242.59797668	-7453823.50000000	-10363490.00000000	-7846845.00000000	-11450655.00000000	-8425548.00000000	-11562531.00000000	-8395536.00000000	-3241470.75000000	-5542077.00000000	-20581720.00000000	-7344006.50000000	-10162194.00000000	-19439184.00000000	-15312995.00000000	-3920960.75000000	-8147743.00000000	-11592543.00000000	-11353451.00000000	-9756465.00000000	-8614353.00000000	-13360616.00000000	-9625194.00000000	-24003874.00000000	-21851358.00000000	-10802877.00000000	-13786602.00000000	-17497624.00000000	-12075179.00000000	-11932248.00000000	-11684237.00000000	-6318390.50000000	-12585153.00000000	-9245891.00000000	-9664565.00000000	-13619342.00000000	-12601027.00000000	-9030059.00000000	-8402676.00000000	-13510192.00000000	-6720993.00000000	-18862906.00000000	-18052592.00000000	-12323133.00000000	-18529550.00000000	-10042959.00000000	-17704498.00000000	-24748936.00000000	-25003778.00000000	-18817180.00000000
242.56614685	-7312906.50000000	-10145868.00000000	-7948324.50000000	-12130092.00000000	-8420562.00000000	-11809235.00000000	-8574798.00000000	-3700465.25000000	-5140902.50000000	-20606308.00000000	-7539352.00000000	-10068994.00000000	-19477100.00000000	-15046365.00000000	-3791307.50000000	-8109058.00000000	-11138469.00000000	-11075067.00000000	-10295087.00000000	-8888794.00000000	-13295990.00000000	-9539121.00000000	-24230748.00000000	-21246258.00000000	-10133183.00000000	-13100110.00000000	-17460326.00000000	-12219871.00000000	-12034003.00000000	-11983742.00000000	-6264379.00000000	-12400005.00000000	-9600836.00000000	-9445777.00000000	-13472272.00000000	-12906102.00000000	-8695322.00000000	-8642759.00000000	-13346519.00000000	-7151138.50000000	-18796062.00000000	-17792014.00000000	-12013933.00000000	-18229516.00000000	-10467810.00000000	-18257188.00000000	-24741110.00000000	-25446224.00000000	-18824786.00000000
242.53428650	-7060381.00000000	-9931661.00000000	-8064349.00000000	-12860936.00000000	-8442274.00000000	-11985356.00000000	-8708806.00000000	-4129640.25000000	-4827369.50000000	-20626804.00000000	-7801808.50000000	-9828184.00000000	-19480682.00000000	-14748114.00000000	-3985909.50000000	-8117265.50000000	-10517885.00000000	-10824255.00000000	-10907182.00000000	-9215007.00000000	-13240917.00000000	-9493645.00000000	-24359128.00000000	-20428784.00000000	-9590677.00000000	-12476499.00000000	-17266766.00000000	-12331827.00000000	-12017288.00000000	-12085923.00000000	-6283696.50000000	-12209520.00000000	-9944937.00000000	-9393697.00000000	-13148179.00000000	-13223765.00000000	-8265777.00000000	-8712113.00000000	-13266256.00000000	-7654438.00000000	-18769096.00000000	-17521776.00000000	-11749292.00000000	-17977120.00000000	-10993752.00000000	-18650944.00000000	-24677922.00000000	-25801876.00000000	-18895954.00000000
242.50245667	-6757712.00000000	-9823625.00000000	-8132458.50000000	-13528706.00000000	-8396785.00000000	-12089909.00000000	-8764707.00000000	-4474682.50000000	-4600465.00000000	-20612356.00000000	-8063022.00000000	-9445235.00000000	-19375278.00000000	-14432667.00000000	-4383446.50000000	-8240363.00000000	-9739184.00000000	-10622907.00000000	-11582740.00000000	-9605980.00000000	-13185887.00000000	-9539739.00000000	-24406014.00000000	-19484480.00000000	-9147283.00000000	-12012519.00000000	-16991252.00000000	-12419693.00000000	-11938520.00000000	-12019772.00000000	-6367525.50000000	-12036538.00000000	-10245591.00000000	-9390171.00000000	-12711807.00000000	-13440762.00000000	-7844231.50000000	-8572980.00000000	-13351345.00000000	-8175019.50000000	-18802844.00000000	-17334304.00000000	-11516945.00000000	-17895636.00000000	-11473043.00000000	-18816262.00000000	-24597568.00000000	-26041802.00000000	-19030314.00000000
242.47061157	-6492830.50000000	-9836872.00000000	-8080962.00000000	-14010768.00000000	-8209279.50000000	-12151173.00000000	-8712399.00000000	-4730997.50000000	-4466167.50000000	-20544076.00000000	-8269558.00000000	-8950523.00000000	-19147022.00000000	-14163815.00000000	-4817569.50000000	-8525935.00000000	-8861900.00000000	-10472522.00000000	-12294940.00000000	-10081982.00000000	-13099161.00000000	-9687178.00000000	-24348174.00000000	-18526782.00000000	-8788214.00000000	-11711651.00000000	-16731438.00000000	-12470831.00000000	-11853763.00000000	-11822391.00000000	-6457463.50000000	-11890691.00000000	-10479123.00000000	-9353017.00000000	-12278932.00000000	-13492296.00000000	-7501164.50000000	-8279853.50000000	-13639159.00000000	-8628554.00000000	-18862070.00000000	-17279344.00000000	-11311897.00000000	-18045238.00000000	-11809695.00000000	-18747944.00000000	-24555128.00000000	-26121430.00000000	-19249294.00000000
242.43878174	-6362976.00000000	-9925228.00000000	-7906686.00000000	-14250680.00000000	-7862686.50000000	-12173061.00000000	-8530370.00000000	-4921298.50000000	-4435679.00000000	-20432836.00000000	-8407653.00000000	-8410114.00000000	-18831374.00000000	-13993112.00000000	-5170035.00000000	-8988722.00000000	-7964669.00000000	-10368560.00000000	-12980114.00000000	-10637062.00000000	-12978914.00000000	-9922503.00000000	-24163700.00000000	-17655642.00000000	-8533119.00000000	-11520132.00000000	-16547817.00000000	-12457016.00000000	-11751622.00000000	-11522732.00000000	-6472655.00000000	-11767611.00000000	-10628917.00000000	-9255226.00000000	-11952498.00000000	-13397587.00000000	-7249052.50000000	-7946675.50000000	-14078551.00000000	-8946222.00000000	-18907144.00000000	-17340236.00000000	-11148379.00000000	-18420558.00000000	-11986625.00000000	-18498070.00000000	-24573496.00000000	-25990220.00000000	-19563566.00000000
242.40695190	-6429279.00000000	-10057964.00000000	-7703171.00000000	-14305512.00000000	-7413824.00000000	-12115185.00000000	-8226238.00000000	-5060559.00000000	-4517722.00000000	-20313454.00000000	-8504379.00000000	-7895989.00000000	-18460792.00000000	-13908940.00000000	-5425550.00000000	-9622273.00000000	-7113321.50000000	-10312139.00000000	-13540677.00000000	-11215963.00000000	-12875648.00000000	-10236178.00000000	-23880776.00000000	-16927222.00000000	-8404606.00000000	-11399715.00000000	-16424297.00000000	-12357427.00000000	-11554512.00000000	-11154657.00000000	-6367557.00000000	-11648207.00000000	-10678759.00000000	-9093521.00000000	-11774457.00000000	-13235641.00000000	-7054744.00000000	-7662323.00000000	-14527045.00000000	-9097224.00000000	-18954896.00000000	-17461346.00000000	-11052615.00000000	-18980270.00000000	-12055051.00000000	-18146250.00000000	-24613318.00000000	-25638524.00000000	-19951958.00000000
242.37509155	-6670746.00000000	-10262578.00000000	-7613006.00000000	-14309414.00000000	-6977660.50000000	-11924526.00000000	-7842460.00000000	-5143078.50000000	-4708344.00000000	-20215638.00000000	-8604507.00000000	-7446628.00000000	-18034342.00000000	-13850024.00000000	-5652297.00000000	-10400697.00000000	-6360030.50000000	-10310516.00000000	-13890154.00000000	-11732460.00000000	-12851412.00000000	-10622637.00000000	-23573902.00000000	-16343865.00000000	-8382428.50000000	-11370440.00000000	-16284964.00000000	-12174929.00000000	-11197527.00000000	-10774322.00000000	-6164270.50000000	-11506598.00000000	-10629189.00000000	-8870029.00000000	-11724875.00000000	-13078854.00000000	-6869753.00000000	-7431003.00000000	-14815056.00000000	-9081000.00000000	-19073364.00000000	-17596472.00000000	-11036205.00000000	-19666106.00000000	-12094569.00000000	-17775004.00000000	-24602614.00000000	-25118994.00000000	-20372290.00000000
242.34326172	-6986380.50000000	-10592043.00000000	-7743480.00000000	-14370403.00000000	-6672826.00000000	-11585054.00000000	-7430459.00000000	-5164330.50000000	-4989420.00000000	-20143736.00000000	-8731296.00000000	-7071864.50000000	-17538442.00000000	-13764193.00000000	-5931483.50000000	-11256215.00000000	-5761401.00000000	-10372702.00000000	-14010082.00000000	-12122613.00000000	-12919756.00000000	-11056136.00000000	-23310236.00000000	-15865093.00000000	-8393080.00000000	-11484578.00000000	-16062816.00000000	-11939025.00000000	-10704857.00000000	-10444902.00000000	-5934917.50000000	-11325952.00000000	-10524454.00000000	-8612256.00000000	-11761414.00000000	-12944176.00000000	-6659297.50000000	-7192577.00000000	-14841677.00000000	-8904819.00000000	-19307266.00000000	-17731956.00000000	-11082927.00000000	-20396688.00000000	-12158265.00000000	-17453972.00000000	-24499262.00000000	-24509134.00000000	-20784250.00000000
242.31141663	-7253003.50000000	-11057789.00000000	-8104023.50000000	-14487886.00000000	-6558052.00000000	-11138620.00000000	-7020387.00000000	-5148606.50000000	-5339002.50000000	-20093474.00000000	-8849591.00000000	-6795873.50000000	-16987388.00000000	-13643625.00000000	-6290734.00000000	-12068629.00000000	-5378013.00000000	-10505592.00000000	-13962544.00000000	-12383954.00000000	-13036315.00000000	-11479001.00000000	-23106146.00000000	-15440055.00000000	-8345359.50000000	-11758837.00000000	-15769446.00000000	-11699371.00000000	-10182173.00000000	-10194295.00000000	-5754637.00000000	-11108939.00000000	-10442812.00000000	-8386088.50000000	-11863365.00000000	-12804726.00000000	-6424517.00000000	-6896173.00000000	-14629452.00000000	-8571724.00000000	-19615160.00000000	-17874714.00000000	-11171372.00000000	-21063652.00000000	-12231224.00000000	-17221904.00000000	-24323950.00000000	-23855638.00000000	-21153766.00000000
242.27957153	-7385507.00000000	-11599012.00000000	-8597346.00000000	-14561616.00000000	-6614790.50000000	-10660856.00000000	-6626709.50000000	-5142409.00000000	-5737365.00000000	-20086426.00000000	-8860658.00000000	-6671598.00000000	-16437049.00000000	-13502141.00000000	-6684177.50000000	-12707541.00000000	-5242899.50000000	-10709055.00000000	-13840232.00000000	-12558336.00000000	-13149225.00000000	-11823781.00000000	-22937502.00000000	-15053934.00000000	-8180504.00000000	-12131403.00000000	-15504388.00000000	-11510395.00000000	-9737515.00000000	-9995301.00000000	-5662576.50000000	-10872981.00000000	-10437970.00000000	-8257755.00000000	-12043310.00000000	-12643073.00000000	-6211096.50000000	-6550275.50000000	-14295016.00000000	-8092554.50000000	-19893708.00000000	-18031284.00000000	-11309845.00000000	-21560740.00000000	-12237144.00000000	-17071732.00000000	-24137244.00000000	-23166074.00000000	-21439164.00000000
242.24772644	-7346304.00000000	-12112316.00000000	-9064407.00000000	-14475274.00000000	-6794027.50000000	-10215151.00000000	-6285304.00000000	-5171670.00000000	-6153633.00000000	-20171516.00000000	-8650199.00000000	-6732167.50000000	-15964063.00000000	-13334036.00000000	-7025827.00000000	-13107177.00000000	-5331745.50000000	-10970516.00000000	-13699089.00000000	-12675964.00000000	-13248539.00000000	-12048895.00000000	-22781854.00000000	-14758140.00000000	-7900815.50000000	-12483747.00000000	-15391166.00000000	-11409147.00000000	-9418785.00000000	-9800317.00000000	-5653815.00000000	-10634506.00000000	-10483610.00000000	-8234434.50000000	-12318500.00000000	-12487280.00000000	-6089302.50000000	-6206283.00000000	-13963293.00000000	-7509789.50000000	-20070230.00000000	-18200684.00000000	-11535893.00000000	-21836292.00000000	-12099508.00000000	-16958690.00000000	-23994098.00000000	-22454572.00000000	-21590216.00000000
242.21589661	-7116510.50000000	-12505890.00000000	-9362458.00000000	-14177340.00000000	-7073621.50000000	-9822905.00000000	-6072334.00000000	-5206342.00000000	-6529682.00000000	-20382118.00000000	-8171354.00000000	-6932467.00000000	-15637247.00000000	-13114402.00000000	-7250503.00000000	-13303601.00000000	-5574627.00000000	-11264716.00000000	-13533384.00000000	-12722223.00000000	-13363201.00000000	-12152176.00000000	-22637402.00000000	-14652295.00000000	-7566995.00000000	-12705339.00000000	-15490933.00000000	-11399127.00000000	-9223396.00000000	-9594716.00000000	-5701426.50000000	-10395726.00000000	-10481503.00000000	-8254472.00000000	-12668510.00000000	-12393914.00000000	-6106008.00000000	-5906379.00000000	-13693037.00000000	-6902278.50000000	-20166008.00000000	-18375290.00000000	-11868880.00000000	-21920270.00000000	-11811987.00000000	-16834878.00000000	-23920788.00000000	-21783842.00000000	-21578964.00000000
242.18406677	-6688630.50000000	-12737325.00000000	-9439030.00000000	-13704496.00000000	-7458878.00000000	-9473236.00000000	-6068953.00000000	-5174793.50000000	-6797834.50000000	-20698272.00000000	-7501525.00000000	-7157393.00000000	-15501713.00000000	-12841464.00000000	-7361335.50000000	-13395339.00000000	-5904590.50000000	-11563283.00000000	-13305973.00000000	-12662053.00000000	-13522835.00000000	-12154153.00000000	-22501454.00000000	-14817822.00000000	-7274250.50000000	-12746902.00000000	-15762383.00000000	-11453878.00000000	-9144137.00000000	-9403584.00000000	-5787920.00000000	-10145511.00000000	-10330833.00000000	-8244978.50000000	-13019930.00000000	-12399496.00000000	-6244019.50000000	-5655504.50000000	-13462811.00000000	-6352595.00000000	-20260940.00000000	-18537382.00000000	-12260469.00000000	-21891126.00000000	-11454471.00000000	-16684627.00000000	-23919670.00000000	-21251886.00000000	-21436374.00000000
242.15220642	-6103555.00000000	-12827156.00000000	-9357375.00000000	-13154964.00000000	-7929695.00000000	-9161553.00000000	-6297196.50000000	-5020352.50000000	-6936575.00000000	-21066214.00000000	-6817900.00000000	-7294889.50000000	-15568790.00000000	-12560036.00000000	-7431149.00000000	-13469080.00000000	-6295581.00000000	-11850135.00000000	-12997271.00000000	-12490814.00000000	-13735703.00000000	-12074274.00000000	-22344668.00000000	-15248761.00000000	-7115967.00000000	-12631056.00000000	-16092972.00000000	-11536422.00000000	-9183164.00000000	-9241942.00000000	-5916396.50000000	-9877814.00000000	-9999294.00000000	-8185865.00000000	-13278443.00000000	-12492232.00000000	-6429988.50000000	-5438976.50000000	-13212980.00000000	-5897655.00000000	-20398550.00000000	-18658606.00000000	-12597341.00000000	-21806800.00000000	-11137532.00000000	-16535086.00000000	-23976498.00000000	-20934216.00000000	-21247928.00000000
242.12037659	-5481078.00000000	-12856019.00000000	-9253208.00000000	-12648178.00000000	-8406898.00000000	-8920022.00000000	-6685605.00000000	-4749486.50000000	-7009693.00000000	-21456556.00000000	-6300468.50000000	-7294331.50000000	-15801953.00000000	-12326396.00000000	-7555368.00000000	-13560588.00000000	-6753932.00000000	-12132664.00000000	-12634618.00000000	-12256124.00000000	-13996158.00000000	-11922669.00000000	-22120066.00000000	-15835568.00000000	-7142273.50000000	-12431232.00000000	-16369472.00000000	-11616014.00000000	-9325004.00000000	-9073592.00000000	-6087288.50000000	-9616286.00000000	-9544598.00000000	-8114931.50000000	-13388697.00000000	-12631600.00000000	-6587406.00000000	-5253718.00000000	-12902382.00000000	-5507690.50000000	-20538354.00000000	-18717420.00000000	-12762718.00000000	-21665458.00000000	-10927244.00000000	-16444206.00000000	-24057586.00000000	-20839110.00000000	-21098072.00000000
242.08853149	-4984984.00000000	-12938881.00000000	-9251045.00000000	-12290225.00000000	-8787303.00000000	-8808118.00000000	-7094150.00000000	-4431473.50000000	-7129538.50000000	-21892502.00000000	-6033858.00000000	-7153237.50000000	-16108128.00000000	-12153830.00000000	-7790302.00000000	-13668167.00000000	-7277057.00000000	-12438146.00000000	-12290742.00000000	-12034729.00000000	-14291791.00000000	-11704581.00000000	-21796272.00000000	-16419108.00000000	-7333115.00000000	-12242301.00000000	-16538341.00000000	-11672836.00000000	-9519459.00000000	-8836821.00000000	-6263670.00000000	-9420053.00000000	-9081871.00000000	-8079908.00000000	-13374569.00000000	-12791657.00000000	-6681984.50000000	-5113089.50000000	-12538958.00000000	-5114533.50000000	-20609656.00000000	-18726108.00000000	-12708061.00000000	-21432954.00000000	-10818964.00000000	-16480941.00000000	-24112196.00000000	-20913354.00000000	-21009350.00000000
242.05670166	-4736608.50000000	-13168972.00000000	-9397412.00000000	-12146087.00000000	-9011197.00000000	-8869114.00000000	-7376882.00000000	-4156539.50000000	-7358790.00000000	-22413186.00000000	-5975982.00000000	-6866673.50000000	-16355369.00000000	-12011829.00000000	-8121913.50000000	-13776951.00000000	-7822170.50000000	-12792900.00000000	-12056088.00000000	-11894708.00000000	-14596003.00000000	-11422997.00000000	-21373206.00000000	-16879182.00000000	-7612212.00000000	-12149799.00000000	-16626107.00000000	-11699365.00000000	-9708726.00000000	-8509610.00000000	-6371498.50000000	-9350590.00000000	-8723809.00000000	-8097283.50000000	-13323260.00000000	-12977710.00000000	-6717838.00000000	-5023108.00000000	-12170219.00000000	-4660689.00000000	-20605684.00000000	-18734524.00000000	-12480485.00000000	-21101038.00000000	-10775193.00000000	-16700183.00000000	-24091788.00000000	-21085804.00000000	-20933486.00000000
242.02485657	-4754252.50000000	-13559315.00000000	-9645601.00000000	-12223202.00000000	-9087835.00000000	-9095933.00000000	-7442389.00000000	-3990681.50000000	-7641473.00000000	-23015358.00000000	-6000881.00000000	-6414901.00000000	-16419323.00000000	-11888889.00000000	-8483754.00000000	-13861049.00000000	-8310072.00000000	-13194110.00000000	-11991059.00000000	-11870345.00000000	-14871323.00000000	-11077765.00000000	-20864880.00000000	-17197120.00000000	-7901991.50000000	-12195873.00000000	-16717232.00000000	-11706047.00000000	-9871286.00000000	-8132580.50000000	-6352658.50000000	-9415801.00000000	-8524161.00000000	-8155374.00000000	-13321714.00000000	-13192965.00000000	-6702045.00000000	-4962506.00000000	-11849450.00000000	-4123913.00000000	-20609314.00000000	-18794558.00000000	-12192543.00000000	-20708502.00000000	-10780458.00000000	-17106312.00000000	-23971406.00000000	-21308084.00000000	-20803700.00000000
241.99301147	-4969726.50000000	-14030937.00000000	-9881817.00000000	-12474400.00000000	-9060461.00000000	-9442354.00000000	-7286254.00000000	-3955102.00000000	-7836546.50000000	-23636142.00000000	-5973436.00000000	-5809459.50000000	-16237001.00000000	-11845972.00000000	-8802126.00000000	-13880712.00000000	-8655888.00000000	-13594572.00000000	-12078844.00000000	-11946351.00000000	-15098817.00000000	-10672935.00000000	-20280008.00000000	-17449720.00000000	-8176259.50000000	-12355314.00000000	-16902120.00000000	-11720995.00000000	-10034889.00000000	-7760806.50000000	-6227552.00000000	-9542540.00000000	-8454613.00000000	-8241118.50000000	-13397835.00000000	-13386892.00000000	-6628064.00000000	-4892738.00000000	-11607071.00000000	-3507842.50000000	-20719062.00000000	-18913160.00000000	-11962798.00000000	-20304710.00000000	-10860915.00000000	-17621896.00000000	-23752746.00000000	-21567852.00000000	-20600088.00000000
241.96118164	-5291264.50000000	-14462197.00000000	-9966602.00000000	-12817551.00000000	-8965121.00000000	-9865129.00000000	-6984861.00000000	-4030596.50000000	-7826532.00000000	-24184898.00000000	-5813742.00000000	-5139386.00000000	-15839366.00000000	-11989135.00000000	-9031825.00000000	-13802521.00000000	-8807234.00000000	-13915496.00000000	-12218545.00000000	-12044804.00000000	-15298775.00000000	-10236006.00000000	-19631656.00000000	-17739010.00000000	-8459569.00000000	-12548360.00000000	-17220276.00000000	-11770018.00000000	-10248590.00000000	-7407671.50000000	-6099900.50000000	-9616004.00000000	-8436110.00000000	-8351376.00000000	-13517157.00000000	-13446728.00000000	-6492528.00000000	-4788972.00000000	-11445573.00000000	-2829188.00000000	-20954582.00000000	-19039280.00000000	-11864746.00000000	-19907294.00000000	-11061917.00000000	-18100888.00000000	-23454184.00000000	-21879836.00000000	-20373352.00000000
241.92932129	-5645961.00000000	-14753203.00000000	-9783368.00000000	-13160920.00000000	-8834947.00000000	-10345488.00000000	-6650189.50000000	-4175043.75000000	-7600318.00000000	-24581084.00000000	-5531904.50000000	-4555373.00000000	-15347130.00000000	-12379962.00000000	-9165296.00000000	-13630353.00000000	-8774806.00000000	-14079964.00000000	-12281444.00000000	-12034657.00000000	-15500609.00000000	-9832622.00000000	-18960836.00000000	-18108826.00000000	-8772613.00000000	-12693609.00000000	-17633146.00000000	-11845814.00000000	-10543132.00000000	-7053803.50000000	-6088029.50000000	-9559810.00000000	-8408675.00000000	-8479152.00000000	-13635442.00000000	-13259482.00000000	-6308923.00000000	-4660752.00000000	-11352400.00000000	-2123912.50000000	-21239678.00000000	-19098262.00000000	-11903795.00000000	-19510482.00000000	-11412418.00000000	-18401418.00000000	-23111384.00000000	-22268920.00000000	-20213580.00000000
241.89749146	-5977186.50000000	-14851478.00000000	-9293428.00000000	-13431331.00000000	-8733375.00000000	-10863245.00000000	-6366483.50000000	-4346936.00000000	-7243883.50000000	-24766748.00000000	-5221338.00000000	-4194322.50000000	-14929686.00000000	-12972444.00000000	-9224389.00000000	-13409516.00000000	-8640435.00000000	-14040467.00000000	-12194829.00000000	-11785943.00000000	-15683793.00000000	-9555806.00000000	-18332598.00000000	-18511628.00000000	-9081938.00000000	-12764946.00000000	-18046622.00000000	-11895109.00000000	-10908051.00000000	-6706387.00000000	-6243577.50000000	-9383004.00000000	-8379937.00000000	-8596489.00000000	-13752677.00000000	-12799726.00000000	-6089335.00000000	-4543764.50000000	-11310886.00000000	-1454682.75000000	-21468270.00000000	-19040758.00000000	-12023001.00000000	-19133286.00000000	-11901166.00000000	-18471852.00000000	-22790392.00000000	-22749116.00000000	-20193378.00000000
241.86564636	-6230942.50000000	-14741373.00000000	-8572628.00000000	-13606656.00000000	-8757948.00000000	-11359480.00000000	-6152857.00000000	-4529820.50000000	-6869365.50000000	-24708642.00000000	-5003491.00000000	-4106383.50000000	-14739301.00000000	-13635478.00000000	-9248427.00000000	-13197160.00000000	-8527529.00000000	-13781078.00000000	-11981403.00000000	-11248436.00000000	-15762673.00000000	-9488565.00000000	-17796328.00000000	-18851038.00000000	-9309648.00000000	-12803837.00000000	-18366734.00000000	-11839159.00000000	-11293888.00000000	-6425637.50000000	-6532512.00000000	-9152497.00000000	-8403125.00000000	-8655396.00000000	-13911572.00000000	-12163811.00000000	-5821340.00000000	-4474693.50000000	-11300477.00000000	-891969.68750000	-21570336.00000000	-18867082.00000000	-12132810.00000000	-18840846.00000000	-12468896.00000000	-18377598.00000000	-22584470.00000000	-23300200.00000000	-20324892.00000000
241.83381653	-6367200.00000000	-14440621.00000000	-7788684.50000000	-13736100.00000000	-8989588.00000000	-11746294.00000000	-5982450.00000000	-4745957.00000000	-6559190.00000000	-24413048.00000000	-4949500.00000000	-4240017.00000000	-14844501.00000000	-14232367.00000000	-9280733.00000000	-13034270.00000000	-8539478.00000000	-13304302.00000000	-11720779.00000000	-10495896.00000000	-15645507.00000000	-9661879.00000000	-17353264.00000000	-19060770.00000000	-9393341.00000000	-12876340.00000000	-18546594.00000000	-11612917.00000000	-11639798.00000000	-6276102.00000000	-6887548.00000000	-8930029.00000000	-8506717.00000000	-8608780.00000000	-14142024.00000000	-11515494.00000000	-5486820.50000000	-4474346.50000000	-11298171.00000000	-479132.84375000	-21513660.00000000	-18617766.00000000	-12157002.00000000	-18702360.00000000	-13016848.00000000	-18242028.00000000	-22574028.00000000	-23857688.00000000	-20552374.00000000
241.80197144	-6388883.00000000	-14015593.00000000	-7116739.00000000	-13916802.00000000	-9426631.00000000	-11970594.00000000	-5836188.50000000	-5047103.50000000	-6359950.00000000	-23942686.00000000	-5040876.50000000	-4488662.50000000	-15194365.00000000	-14685686.00000000	-9350411.00000000	-12945009.00000000	-8702626.00000000	-12628658.00000000	-11479280.00000000	-9696558.00000000	-15307220.00000000	-10035060.00000000	-16971914.00000000	-19147522.00000000	-9331888.00000000	-13013311.00000000	-18596798.00000000	-11197887.00000000	-11917150.00000000	-6257089.50000000	-7271269.00000000	-8745090.00000000	-8652735.00000000	-8440066.00000000	-14411647.00000000	-10991752.00000000	-5114574.50000000	-4548719.50000000	-11292736.00000000	-222564.43750000	-21268328.00000000	-18350362.00000000	-12075942.00000000	-18725588.00000000	-13437569.00000000	-18152070.00000000	-22777420.00000000	-24338212.00000000	-20782884.00000000
241.77012634	-6353322.50000000	-13572160.00000000	-6652107.50000000	-14226448.00000000	-9962930.00000000	-12069617.00000000	-5734701.50000000	-5485829.00000000	-6298005.50000000	-23404816.00000000	-5211227.00000000	-4757254.00000000	-15637592.00000000	-14991997.00000000	-9455170.00000000	-12945478.00000000	-8952942.00000000	-11804986.00000000	-11280426.00000000	-9029890.00000000	-14796622.00000000	-10510657.00000000	-16636039.00000000	-19162670.00000000	-9172505.00000000	-13184298.00000000	-18566618.00000000	-10639125.00000000	-12156760.00000000	-6293853.50000000	-7691311.50000000	-8617516.00000000	-8767171.00000000	-8184573.50000000	-14638071.00000000	-10650514.00000000	-4800397.50000000	-4695628.00000000	-11300987.00000000	-121226.92187500	-20804826.00000000	-18118574.00000000	-11938215.00000000	-18838112.00000000	-13662538.00000000	-18106824.00000000	-23143684.00000000	-24695864.00000000	-20939802.00000000
241.73829651	-6348823.50000000	-13192933.00000000	-6389745.00000000	-14664871.00000000	-10431913.00000000	-12153283.00000000	-5720540.50000000	-6087125.00000000	-6382042.00000000	-22905324.00000000	-5432042.00000000	-5001027.00000000	-15991752.00000000	-15204495.00000000	-9557438.00000000	-13033822.00000000	-9170502.00000000	-10927530.00000000	-11131246.00000000	-8605927.00000000	-14179940.00000000	-10975154.00000000	-16369311.00000000	-19138492.00000000	-8961141.00000000	-13320839.00000000	-18519696.00000000	-10046258.00000000	-12422060.00000000	-6299363.00000000	-8168389.50000000	-8574079.00000000	-8801203.00000000	-7924047.50000000	-14752362.00000000	-10490406.00000000	-4653494.00000000	-4902579.00000000	-11362828.00000000	-197731.51562500	-20141288.00000000	-17955850.00000000	-11825544.00000000	-18934024.00000000	-13698261.00000000	-18043130.00000000	-23600064.00000000	-24964350.00000000	-21008458.00000000
241.70643616	-6452783.00000000	-12868426.00000000	-6273604.00000000	-15164409.00000000	-10685973.00000000	-12319840.00000000	-5820666.50000000	-6838689.50000000	-6596665.00000000	-22500970.00000000	-5752650.50000000	-5219110.50000000	-16127737.00000000	-15409529.00000000	-9599452.00000000	-13169905.00000000	-9233098.00000000	-10111796.00000000	-11050843.00000000	-8428757.00000000	-13495403.00000000	-11342585.00000000	-16212129.00000000	-19056542.00000000	-8712011.00000000	-13364256.00000000	-18512802.00000000	-9568344.00000000	-12736979.00000000	-6239809.00000000	-8699702.00000000	-8616379.00000000	-8751938.00000000	-7746725.50000000	-14748557.00000000	-10497873.00000000	-4715518.00000000	-5137632.50000000	-11511859.00000000	-486803.12500000	-19377484.00000000	-17864374.00000000	-11793048.00000000	-18939680.00000000	-13621045.00000000	-17904592.00000000	-24105410.00000000	-25237520.00000000	-21041884.00000000
241.67460632	-6700171.50000000	-12504888.00000000	-6251803.00000000	-15661002.00000000	-10659978.00000000	-12579792.00000000	-6032678.50000000	-7699919.50000000	-6909845.00000000	-22185652.00000000	-6251237.00000000	-5423808.50000000	-16024084.00000000	-15699135.00000000	-9530573.00000000	-13278182.00000000	-9065623.00000000	-9443778.00000000	-11052949.00000000	-8412663.00000000	-12767199.00000000	-11576785.00000000	-16185398.00000000	-18875580.00000000	-8420556.00000000	-13302058.00000000	-18575554.00000000	-9334045.00000000	-13039036.00000000	-6145407.50000000	-9248151.00000000	-8679408.00000000	-8631221.00000000	-7693921.00000000	-14671522.00000000	-10662555.00000000	-4937494.50000000	-5345576.50000000	-11749699.00000000	-990635.56250000	-18657308.00000000	-17821858.00000000	-11834722.00000000	-18847350.00000000	-13532126.00000000	-17694270.00000000	-24654934.00000000	-25593566.00000000	-21120890.00000000
241.64276123	-7078384.50000000	-12018924.00000000	-6283606.50000000	-16150800.00000000	-10385703.00000000	-12854392.00000000	-6337016.00000000	-8613225.00000000	-7293242.50000000	-21915766.00000000	-6952037.00000000	-5622239.50000000	-15762448.00000000	-16134865.00000000	-9333642.00000000	-13279841.00000000	-8681409.00000000	-8937772.00000000	-11101648.00000000	-8437670.00000000	-12043280.00000000	-11680609.00000000	-16285234.00000000	-18583042.00000000	-8093776.50000000	-13172534.00000000	-18697848.00000000	-9380615.00000000	-13219330.00000000	-6074081.00000000	-9755446.00000000	-8655306.00000000	-8437397.00000000	-7734145.00000000	-14562934.00000000	-10953835.00000000	-5234329.50000000	-5454819.50000000	-12050317.00000000	-1653678.12500000	-18081750.00000000	-17809598.00000000	-11903274.00000000	-18706422.00000000	-13507435.00000000	-17475814.00000000	-25238070.00000000	-26028782.00000000	-21298744.00000000
241.61093140	-7545561.50000000	-11427571.00000000	-6315540.50000000	-16674494.00000000	-9960065.00000000	-13042930.00000000	-6705054.50000000	-9503833.00000000	-7730868.00000000	-21654088.00000000	-7797017.00000000	-5825672.00000000	-15470470.00000000	-16718449.00000000	-9037568.00000000	-13123741.00000000	-8205448.00000000	-8539456.00000000	-11101259.00000000	-8417361.00000000	-11398153.00000000	-11664816.00000000	-16502412.00000000	-18218406.00000000	-7763732.00000000	-13037808.00000000	-18840052.00000000	-9626337.00000000	-13223882.00000000	-6072476.50000000	-10166814.00000000	-8486238.00000000	-8171413.50000000	-7789505.00000000	-14426470.00000000	-11299301.00000000	-5546968.00000000	-5391560.50000000	-12387577.00000000	-2386841.25000000	-17651440.00000000	-17840300.00000000	-11958241.00000000	-18591114.00000000	-13574881.00000000	-17333038.00000000	-25804090.00000000	-26463816.00000000	-21572302.00000000
241.57910156	-8057173.50000000	-10838745.00000000	-6282355.50000000	-17254426.00000000	-9497666.00000000	-13094970.00000000	-7093888.00000000	-10271519.00000000	-8207402.00000000	-21403270.00000000	-8690748.00000000	-6064468.50000000	-15250710.00000000	-17391406.00000000	-8707627.00000000	-12793614.00000000	-7846453.00000000	-8175317.50000000	-10947005.00000000	-8338218.50000000	-10899801.00000000	-11526376.00000000	-16822750.00000000	-17854076.00000000	-7479868.00000000	-12937656.00000000	-18964862.00000000	-9918047.00000000	-13117840.00000000	-6157716.50000000	-10460446.00000000	-8235114.50000000	-7870504.00000000	-7794073.50000000	-14245128.00000000	-11597781.00000000	-5842486.00000000	-5101629.00000000	-12755342.00000000	-3113076.25000000	-17286786.00000000	-17953400.00000000	-11985011.00000000	-18557598.00000000	-13722251.00000000	-17323986.00000000	-26276606.00000000	-26815374.00000000	-21892142.00000000
241.54724121	-8582416.00000000	-10351969.00000000	-6145703.50000000	-17855380.00000000	-9097414.00000000	-13029723.00000000	-7452489.00000000	-10794427.00000000	-8697511.00000000	-21206940.00000000	-9556431.00000000	-6375723.50000000	-15143137.00000000	-18062450.00000000	-8415699.00000000	-12307246.00000000	-7802326.50000000	-7814485.00000000	-10598634.00000000	-8241177.00000000	-10588628.00000000	-11258296.00000000	-17196028.00000000	-17558626.00000000	-7296230.00000000	-12849369.00000000	-19063146.00000000	-10119664.00000000	-13047531.00000000	-6314620.50000000	-10667441.00000000	-8048886.00000000	-7606294.50000000	-7736261.50000000	-14024084.00000000	-11757247.00000000	-6072125.00000000	-4584685.50000000	-13164910.00000000	-3787909.00000000	-16896546.00000000	-18173122.00000000	-11965984.00000000	-18602852.00000000	-13917193.00000000	-17460618.00000000	-26598836.00000000	-27063216.00000000	-22189690.00000000
241.51541138	-9100414.00000000	-9973499.00000000	-5921360.00000000	-18398338.00000000	-8828517.00000000	-12899477.00000000	-7750879.50000000	-10963985.00000000	-9175094.00000000	-21112462.00000000	-10347487.00000000	-6763318.50000000	-15144118.00000000	-18639488.00000000	-8209027.00000000	-11725306.00000000	-8149223.50000000	-7498540.00000000	-10116823.00000000	-8164647.00000000	-10487932.00000000	-10882140.00000000	-17517726.00000000	-17371266.00000000	-7260158.00000000	-12685894.00000000	-19151386.00000000	-10172804.00000000	-13137210.00000000	-6504259.00000000	-10857820.00000000	-8040753.00000000	-7443380.00000000	-7656173.00000000	-13809920.00000000	-11727608.00000000	-6166666.50000000	-3928974.00000000	-13631975.00000000	-4386771.50000000	-16432957.00000000	-18467378.00000000	-11850341.00000000	-18654086.00000000	-14123709.00000000	-17719346.00000000	-26761872.00000000	-27252380.00000000	-22396912.00000000
241.48356628	-9585206.00000000	-9627200.00000000	-5650192.50000000	-18792062.00000000	-8720311.00000000	-12739830.00000000	-8000337.50000000	-10744761.00000000	-9628262.00000000	-21119946.00000000	-11029333.00000000	-7169594.50000000	-15257601.00000000	-19051452.00000000	-8101042.00000000	-11150238.00000000	-8803532.00000000	-7314881.00000000	-9637947.00000000	-8110309.50000000	-10612131.00000000	-10468203.00000000	-17669516.00000000	-17294156.00000000	-7398191.00000000	-12347813.00000000	-19248006.00000000	-10098133.00000000	-13411856.00000000	-6687603.50000000	-11088975.00000000	-8206691.50000000	-7407254.00000000	-7610148.00000000	-13668520.00000000	-11512089.00000000	-6097909.50000000	-3310235.50000000	-14167395.00000000	-4890615.50000000	-15903901.00000000	-18751446.00000000	-11580794.00000000	-18614038.00000000	-14313509.00000000	-18061598.00000000	-26795840.00000000	-27436120.00000000	-22458896.00000000
241.45172119	-9999671.00000000	-9239019.00000000	-5337830.00000000	-18947508.00000000	-8749953.00000000	-12552009.00000000	-8229635.00000000	-10219206.00000000	-10052838.00000000	-21164940.00000000	-11576711.00000000	-7493873.00000000	-15525903.00000000	-19267498.00000000	-8086541.00000000	-10684104.00000000	-9592497.00000000	-7326444.00000000	-9308626.00000000	-8067142.50000000	-10944484.00000000	-10116249.00000000	-17596964.00000000	-17297108.00000000	-7704225.00000000	-11799886.00000000	-19352204.00000000	-9965320.00000000	-13794237.00000000	-6853195.00000000	-11356523.00000000	-8453830.00000000	-7496377.50000000	-7635497.00000000	-13645235.00000000	-11157653.00000000	-5937279.50000000	-2926877.50000000	-14765064.00000000	-5293079.00000000	-15358591.00000000	-18939178.00000000	-11166818.00000000	-18437554.00000000	-14473532.00000000	-18441148.00000000	-26744686.00000000	-27613488.00000000	-22349106.00000000
241.41989136	-10308409.00000000	-8807450.00000000	-4932013.50000000	-18789752.00000000	-8846680.00000000	-12326423.00000000	-8436153.00000000	-9568910.00000000	-10427489.00000000	-21161814.00000000	-11989860.00000000	-7648326.00000000	-16005064.00000000	-19317050.00000000	-8155561.00000000	-10364437.00000000	-10367178.00000000	-7505437.50000000	-9219458.00000000	-8056136.00000000	-11411938.00000000	-9904657.00000000	-17353614.00000000	-17332044.00000000	-8146269.50000000	-11108965.00000000	-19433520.00000000	-9867367.00000000	-14153056.00000000	-7022219.50000000	-11599099.00000000	-8699449.00000000	-7715258.50000000	-7736982.00000000	-13740952.00000000	-10729324.00000000	-5827892.00000000	-2897431.00000000	-15381297.00000000	-5616972.50000000	-14870465.00000000	-18997080.00000000	-10725799.00000000	-18169442.00000000	-14605327.00000000	-18795566.00000000	-26650744.00000000	-27710924.00000000	-22081420.00000000
241.38804626	-10497493.00000000	-8401498.00000000	-4367827.50000000	-18295686.00000000	-8931511.00000000	-12075439.00000000	-8569778.00000000	-8984400.00000000	-10706126.00000000	-21075892.00000000	-12291621.00000000	-7604616.50000000	-16703948.00000000	-19290800.00000000	-8282464.00000000	-10144268.00000000	-11056368.00000000	-7723612.00000000	-9368325.00000000	-8125880.00000000	-11903529.00000000	-9844802.00000000	-17071858.00000000	-17351984.00000000	-8691257.00000000	-10402556.00000000	-19424268.00000000	-9894635.00000000	-14360473.00000000	-7223102.00000000	-11756956.00000000	-8936039.00000000	-8081526.00000000	-7896223.00000000	-13915455.00000000	-10277489.00000000	-5879547.50000000	-3195150.75000000	-15925755.00000000	-5912402.50000000	-14520881.00000000	-18953136.00000000	-10432713.00000000	-17902334.00000000	-14713849.00000000	-19041590.00000000	-26547380.00000000	-27617606.00000000	-21700282.00000000
241.35621643	-10580732.00000000	-8102523.00000000	-3636291.00000000	-17537952.00000000	-8974617.00000000	-11834799.00000000	-8573785.00000000	-8560936.00000000	-10848214.00000000	-20954658.00000000	-12494530.00000000	-7397774.00000000	-17543792.00000000	-19299976.00000000	-8404359.00000000	-9948661.00000000	-11633633.00000000	-7814234.50000000	-9667734.00000000	-8290443.00000000	-12329071.00000000	-9873039.00000000	-16894486.00000000	-17325884.00000000	-9320781.00000000	-9777515.00000000	-19222292.00000000	-10090392.00000000	-14342159.00000000	-7464498.50000000	-11824259.00000000	-9210551.00000000	-8596757.00000000	-8095378.00000000	-14109519.00000000	-9819889.00000000	-6087079.00000000	-3675995.00000000	-16292902.00000000	-6227569.50000000	-14376869.00000000	-18857954.00000000	-10411351.00000000	-17698044.00000000	-14793186.00000000	-19092084.00000000	-26447294.00000000	-27254762.00000000	-21250352.00000000
241.32435608	-10586323.00000000	-7945800.50000000	-2809839.50000000	-16677659.00000000	-9021226.00000000	-11627863.00000000	-8439736.00000000	-8262513.00000000	-10858422.00000000	-20881408.00000000	-12580550.00000000	-7093822.00000000	-18377554.00000000	-19408876.00000000	-8428892.00000000	-9753633.00000000	-12062819.00000000	-7664834.50000000	-9990671.00000000	-8480992.00000000	-12664044.00000000	-9883273.00000000	-16925808.00000000	-17242900.00000000	-10016016.00000000	-9240227.00000000	-18728996.00000000	-10410208.00000000	-14112610.00000000	-7735188.00000000	-11840671.00000000	-9561178.00000000	-9215162.00000000	-8341338.50000000	-14272877.00000000	-9356356.00000000	-6350838.00000000	-4177458.75000000	-16423201.00000000	-6567289.00000000	-14468026.00000000	-18739276.00000000	-10660145.00000000	-17554672.00000000	-14822330.00000000	-18890738.00000000	-26331608.00000000	-26642264.00000000	-20754552.00000000
241.29252625	-10535932.00000000	-7903926.00000000	-2009051.75000000	-15889120.00000000	-9158014.00000000	-11432974.00000000	-8219551.00000000	-7983345.00000000	-10788153.00000000	-20890842.00000000	-12529329.00000000	-6751259.00000000	-19055360.00000000	-19589642.00000000	-8284309.00000000	-9604529.00000000	-12292955.00000000	-7274530.50000000	-10228357.00000000	-8577321.00000000	-12943108.00000000	-9777227.00000000	-17215808.00000000	-17111916.00000000	-10731553.00000000	-8733628.00000000	-17922924.00000000	-10737442.00000000	-13774098.00000000	-8019140.50000000	-11837980.00000000	-9984169.00000000	-9845350.00000000	-8670458.00000000	-14389130.00000000	-8902117.00000000	-6570664.00000000	-4605712.50000000	-16339096.00000000	-6865152.00000000	-14778179.00000000	-18591068.00000000	-11065433.00000000	-17443372.00000000	-14777205.00000000	-18444292.00000000	-26158670.00000000	-25917226.00000000	-20222308.00000000
241.26068115	-10432226.00000000	-7913959.00000000	-1350107.00000000	-15275248.00000000	-9447759.00000000	-11200588.00000000	-7991077.00000000	-7649652.00000000	-10691652.00000000	-20922388.00000000	-12364340.00000000	-6398960.00000000	-19485762.00000000	-19737136.00000000	-7971146.50000000	-9561143.00000000	-12298619.00000000	-6740727.00000000	-10325636.00000000	-8496404.00000000	-13220660.00000000	-9505329.00000000	-17746852.00000000	-16964950.00000000	-11401161.00000000	-8223952.50000000	-16915880.00000000	-10962565.00000000	-13465898.00000000	-8292109.00000000	-11805822.00000000	-10450041.00000000	-10386684.00000000	-9120680.00000000	-14488782.00000000	-8498270.00000000	-6716545.50000000	-4950472.50000000	-16115717.00000000	-6994883.50000000	-15259706.00000000	-18398950.00000000	-11473238.00000000	-17356738.00000000	-14650168.00000000	-17834182.00000000	-25895090.00000000	-25278098.00000000	-19670890.00000000
241.22883606	-10264531.00000000	-7921022.00000000	-912833.56250000	-14847071.00000000	-9887617.00000000	-10914663.00000000	-7819458.00000000	-7273522.00000000	-10583237.00000000	-20849284.00000000	-12153480.00000000	-6038589.50000000	-19655712.00000000	-19731312.00000000	-7563688.00000000	-9639107.00000000	-12107174.00000000	-6196898.00000000	-10278115.00000000	-8251451.50000000	-13537804.00000000	-9081797.00000000	-18413920.00000000	-16859378.00000000	-11982619.00000000	-7763951.00000000	-15929813.00000000	-11057242.00000000	-13292906.00000000	-8502024.00000000	-11709554.00000000	-10930596.00000000	-10776370.00000000	-9684993.00000000	-14641459.00000000	-8180399.00000000	-6820236.00000000	-5240422.50000000	-15816048.00000000	-6833004.50000000	-15858818.00000000	-18169888.00000000	-11758792.00000000	-17309774.00000000	-14460021.00000000	-17200204.00000000	-25545698.00000000	-24880382.00000000	-19125500.00000000
241.19700623	-10032197.00000000	-7903200.00000000	-732056.56250000	-14571453.00000000	-10416146.00000000	-10637535.00000000	-7743252.50000000	-6927359.50000000	-10443111.00000000	-20557562.00000000	-11952923.00000000	-5670019.00000000	-19612344.00000000	-19500582.00000000	-7160113.50000000	-9809439.00000000	-11781071.00000000	-5751989.00000000	-10105813.00000000	-7933475.50000000	-13906551.00000000	-8571641.00000000	-19036990.00000000	-16866238.00000000	-12492598.00000000	-7475590.50000000	-15194134.00000000	-11068593.00000000	-13287764.00000000	-8577300.00000000	-11526150.00000000	-11399592.00000000	-11021822.00000000	-10286051.00000000	-14925652.00000000	-7939760.00000000	-6919917.00000000	-5496959.00000000	-15459386.00000000	-6347836.00000000	-16530513.00000000	-17936952.00000000	-11867556.00000000	-17308174.00000000	-14241984.00000000	-16694657.00000000	-25158744.00000000	-24760886.00000000	-18596892.00000000
241.16516113	-9772213.00000000	-7863158.50000000	-797460.18750000	-14423408.00000000	-10946127.00000000	-10485931.00000000	-7773581.50000000	-6685757.50000000	-10265457.00000000	-20018250.00000000	-11756575.00000000	-5325056.50000000	-19433148.00000000	-19048704.00000000	-6832112.00000000	-10039467.00000000	-11381584.00000000	-5465154.00000000	-9830492.00000000	-7649805.50000000	-14299921.00000000	-8058849.50000000	-19437308.00000000	-17041824.00000000	-12979898.00000000	-7470465.00000000	-14835363.00000000	-11045906.00000000	-13425996.00000000	-8483687.00000000	-11250077.00000000	-11816408.00000000	-11200614.00000000	-10801502.00000000	-15385839.00000000	-7729052.00000000	-7022450.50000000	-5721571.50000000	-15050799.00000000	-5649678.00000000	-17229348.00000000	-17740608.00000000	-11831676.00000000	-17342264.00000000	-14023369.00000000	-16416949.00000000	-24808270.00000000	-24850750.00000000	-18073252.00000000
241.13333130	-9563091.00000000	-7805244.50000000	-1063309.37500000	-14390232.00000000	-11391848.00000000	-10556080.00000000	-7888077.50000000	-6593728.50000000	-10095978.00000000	-19309956.00000000	-11510039.00000000	-5077862.50000000	-19203746.00000000	-18441150.00000000	-6613632.50000000	-10314891.00000000	-10953451.00000000	-5354468.50000000	-9470806.00000000	-7478736.50000000	-14653642.00000000	-7612685.50000000	-19539684.00000000	-17399564.00000000	-13453389.00000000	-7775836.00000000	-14831597.00000000	-10986497.00000000	-13662066.00000000	-8279729.00000000	-10871797.00000000	-12128536.00000000	-11420577.00000000	-11125177.00000000	-15995528.00000000	-7514990.50000000	-7105054.00000000	-5905122.50000000	-14625514.00000000	-4945914.00000000	-17884806.00000000	-17608708.00000000	-11754698.00000000	-17419812.00000000	-13806879.00000000	-16361573.00000000	-24571258.00000000	-25056166.00000000	-17549814.00000000
241.10147095	-9484020.00000000	-7732212.00000000	-1478413.50000000	-14440922.00000000	-11686770.00000000	-10868256.00000000	-8026677.00000000	-6667344.50000000	-10016596.00000000	-18580324.00000000	-11171967.00000000	-5008587.50000000	-19003890.00000000	-17769200.00000000	-6514246.50000000	-10622165.00000000	-10534178.00000000	-5420294.00000000	-9050935.00000000	-7454934.00000000	-14899280.00000000	-7269044.00000000	-19415480.00000000	-17902322.00000000	-13842801.00000000	-8316728.50000000	-15039384.00000000	-10856838.00000000	-13947283.00000000	-8098861.00000000	-10373495.00000000	-12305587.00000000	-11753871.00000000	-11216422.00000000	-16648378.00000000	-7320872.00000000	-7133024.50000000	-6033808.50000000	-14248772.00000000	-4421947.50000000	-18389190.00000000	-17550476.00000000	-11750981.00000000	-17586564.00000000	-13579684.00000000	-16421880.00000000	-24506982.00000000	-25324022.00000000	-17065976.00000000
241.06964111	-9548911.00000000	-7668209.50000000	-2023233.37500000	-14510811.00000000	-11804129.00000000	-11372764.00000000	-8105932.50000000	-6894195.50000000	-10085303.00000000	-17964850.00000000	-10754288.00000000	-5140362.50000000	-18896846.00000000	-17113658.00000000	-6520855.50000000	-10926504.00000000	-10163524.00000000	-5663223.00000000	-8611787.00000000	-7564135.00000000	-15020382.00000000	-7031510.50000000	-19224826.00000000	-18480558.00000000	-14046677.00000000	-8954798.00000000	-15253327.00000000	-10649779.00000000	-14228474.00000000	-8058424.00000000	-9762162.00000000	-12375196.00000000	-12184459.00000000	-11103824.00000000	-17192680.00000000	-7208536.00000000	-7074094.50000000	-6088697.50000000	-13970675.00000000	-4144846.75000000	-18623540.00000000	-17559038.00000000	-11865724.00000000	-17893058.00000000	-13342638.00000000	-16459226.00000000	-24635482.00000000	-25637474.00000000	-16698916.00000000
241.03779602	-9674282.00000000	-7673899.00000000	-2717625.00000000	-14523058.00000000	-11776734.00000000	-11989997.00000000	-8048082.00000000	-7225128.00000000	-10277169.00000000	-17511968.00000000	-10305194.00000000	-5407848.50000000	-18923310.00000000	-16523477.00000000	-6586770.00000000	-11178728.00000000	-9880513.00000000	-6082209.00000000	-8215489.00000000	-7745703.50000000	-15080850.00000000	-6883702.00000000	-19109228.00000000	-19066088.00000000	-14029523.00000000	-9551937.00000000	-15269951.00000000	-10402764.00000000	-14449537.00000000	-8180938.00000000	-9102913.00000000	-12419916.00000000	-12610429.00000000	-10852744.00000000	-17501140.00000000	-7217068.00000000	-6917478.00000000	-6052826.00000000	-13788120.00000000	-4070814.00000000	-18514852.00000000	-17609366.00000000	-12044792.00000000	-18335832.00000000	-13131755.00000000	-16389719.00000000	-24922180.00000000	-25968854.00000000	-16509179.00000000
241.00596619	-9722651.00000000	-7820150.00000000	-3582629.00000000	-14423520.00000000	-11693276.00000000	-12635266.00000000	-7806927.50000000	-7586877.00000000	-10470803.00000000	-17170288.00000000	-9865695.00000000	-5693313.50000000	-19102252.00000000	-16015107.00000000	-6641044.50000000	-11339382.00000000	-9717389.00000000	-6652203.50000000	-7933433.00000000	-7925944.50000000	-15184278.00000000	-6800890.00000000	-19125362.00000000	-19625460.00000000	-13870218.00000000	-10025350.00000000	-14955433.00000000	-10163319.00000000	-14560754.00000000	-8403149.00000000	-8505947.00000000	-12527911.00000000	-12904703.00000000	-10530256.00000000	-17535820.00000000	-7323663.00000000	-6698708.50000000	-5928265.00000000	-13649013.00000000	-4133249.50000000	-18083144.00000000	-17653132.00000000	-12191068.00000000	-18833728.00000000	-13008217.00000000	-16220787.00000000	-25288878.00000000	-26254174.00000000	-16492842.00000000
240.97412109	-9591840.00000000	-8135133.00000000	-4590524.00000000	-14196786.00000000	-11660500.00000000	-13224733.00000000	-7384826.00000000	-7926295.50000000	-10497245.00000000	-16849938.00000000	-9448294.00000000	-5898404.50000000	-19433292.00000000	-15582925.00000000	-6628792.50000000	-11391513.00000000	-9699531.00000000	-7303465.00000000	-7814469.50000000	-8078397.50000000	-15388402.00000000	-6756275.00000000	-19258402.00000000	-20170646.00000000	-13708267.00000000	-10373261.00000000	-14304929.00000000	-9957677.00000000	-14523663.00000000	-8651175.00000000	-8069781.00000000	-12733516.00000000	-12991190.00000000	-10188740.00000000	-17358778.00000000	-7464793.00000000	-6500787.50000000	-5747103.50000000	-13480660.00000000	-4309352.00000000	-17437182.00000000	-17628190.00000000	-12254602.00000000	-19256750.00000000	-13023597.00000000	-16015059.00000000	-25655818.00000000	-26410612.00000000	-16588413.00000000
240.94227600	-9271025.00000000	-8578340.00000000	-5656249.00000000	-13859995.00000000	-11751995.00000000	-13695990.00000000	-6845159.00000000	-8240622.50000000	-10236827.00000000	-16501483.00000000	-9046351.00000000	-5983902.50000000	-19891646.00000000	-15204556.00000000	-6545966.50000000	-11339722.00000000	-9846762.00000000	-7936296.50000000	-7850178.00000000	-8257931.00000000	-15648386.00000000	-6725286.00000000	-19475528.00000000	-20731936.00000000	-13637205.00000000	-10661582.00000000	-13453239.00000000	-9803861.00000000	-14313604.00000000	-8891877.00000000	-7830272.50000000	-12995010.00000000	-12883359.00000000	-9866096.00000000	-17074118.00000000	-7590317.00000000	-6405278.50000000	-5562305.00000000	-13207461.00000000	-4600793.50000000	-16722997.00000000	-17493154.00000000	-12265254.00000000	-19473310.00000000	-13189241.00000000	-15826307.00000000	-25980708.00000000	-26364728.00000000	-16724278.00000000
240.91044617	-8820732.00000000	-9068867.00000000	-6681999.00000000	-13452895.00000000	-11978185.00000000	-14046244.00000000	-6308661.50000000	-8542979.00000000	-9716902.00000000	-16138952.00000000	-8648813.00000000	-5952225.00000000	-20417420.00000000	-14837880.00000000	-6431027.00000000	-11212489.00000000	-10169382.00000000	-8477193.00000000	-7969732.50000000	-8562759.00000000	-15841334.00000000	-6690149.00000000	-19760384.00000000	-21307210.00000000	-13645977.00000000	-10978636.00000000	-12612390.00000000	-9739477.00000000	-13938074.00000000	-9111676.00000000	-7754542.50000000	-13224479.00000000	-12667418.00000000	-9593476.00000000	-16747750.00000000	-7695058.00000000	-6421685.50000000	-5423758.50000000	-12757969.00000000	-4970586.00000000	-16072382.00000000	-17268070.00000000	-12286294.00000000	-19388802.00000000	-13469083.00000000	-15666964.00000000	-26253002.00000000	-26067382.00000000	-16855282.00000000
240.87858582	-8313903.00000000	-9535686.00000000	-7609890.00000000	-13034528.00000000	-12294446.00000000	-14336787.00000000	-5911401.00000000	-8787626.00000000	-9143469.00000000	-15797888.00000000	-8244742.00000000	-5815022.00000000	-20915118.00000000	-14427392.00000000	-6326629.50000000	-11066371.00000000	-10661472.00000000	-8932082.00000000	-8080800.50000000	-9047372.00000000	-15852098.00000000	-6643698.50000000	-20109490.00000000	-21837908.00000000	-13654886.00000000	-11384564.00000000	-11972880.00000000	-9812162.00000000	-13466442.00000000	-9265950.00000000	-7772576.00000000	-13340877.00000000	-12454184.00000000	-9404860.00000000	-16374064.00000000	-7804840.50000000	-6465285.50000000	-5357456.50000000	-12087416.00000000	-5326045.00000000	-15589390.00000000	-17041628.00000000	-12358467.00000000	-18983182.00000000	-13790827.00000000	-15520422.00000000	-26445880.00000000	-25510504.00000000	-16965774.00000000
240.84675598	-7802352.00000000	-9939180.00000000	-8431886.00000000	-12677311.00000000	-12636819.00000000	-14627856.00000000	-5734901.50000000	-8846971.00000000	-8821163.00000000	-15496006.00000000	-7828266.00000000	-5595815.50000000	-21278228.00000000	-13934762.00000000	-6255991.00000000	-10971276.00000000	-11295179.00000000	-9378091.00000000	-8130479.50000000	-9662761.00000000	-15652284.00000000	-6591682.50000000	-20512344.00000000	-22254340.00000000	-13595538.00000000	-11886360.00000000	-11638913.00000000	-10033975.00000000	-13029441.00000000	-9271838.00000000	-7814505.50000000	-13303391.00000000	-12334797.00000000	-9338696.00000000	-15914778.00000000	-7940929.00000000	-6416491.00000000	-5360556.50000000	-11218208.00000000	-5575145.00000000	-15361480.00000000	-16923416.00000000	-12499006.00000000	-18348190.00000000	-14065050.00000000	-15366615.00000000	-26482282.00000000	-24761062.00000000	-17064612.00000000
240.81492615	-7319994.00000000	-10257796.00000000	-9155010.00000000	-12444282.00000000	-12959448.00000000	-14889771.00000000	-5764056.00000000	-8590754.00000000	-8989305.00000000	-15250823.00000000	-7413484.50000000	-5356272.50000000	-21432130.00000000	-13376684.00000000	-6228002.50000000	-10974139.00000000	-12014480.00000000	-9889526.00000000	-8135929.00000000	-10272999.00000000	-15314646.00000000	-6554404.50000000	-20938492.00000000	-22560970.00000000	-13449770.00000000	-12447302.00000000	-11628752.00000000	-10353979.00000000	-12758611.00000000	-9057205.00000000	-7833716.00000000	-13107279.00000000	-12356758.00000000	-9419544.00000000	-15365441.00000000	-8099201.50000000	-6209483.50000000	-5412563.00000000	-10262163.00000000	-5695403.50000000	-15451369.00000000	-16968140.00000000	-12730621.00000000	-17683036.00000000	-14214289.00000000	-15192864.00000000	-26267488.00000000	-23979774.00000000	-17191050.00000000
240.78308105	-6882320.50000000	-10477405.00000000	-9765238.00000000	-12354500.00000000	-13249321.00000000	-14981006.00000000	-5917052.00000000	-8001678.50000000	-9676616.00000000	-15122324.00000000	-7045691.00000000	-5191371.00000000	-21366466.00000000	-12830663.00000000	-6241478.50000000	-11070083.00000000	-12732101.00000000	-10463898.00000000	-8160085.00000000	-10727082.00000000	-14957733.00000000	-6563865.50000000	-21336354.00000000	-22868094.00000000	-13221774.00000000	-13013130.00000000	-11906005.00000000	-10684022.00000000	-12699398.00000000	-8611433.00000000	-7814414.50000000	-12760831.00000000	-12518358.00000000	-9625774.00000000	-14783417.00000000	-8257679.50000000	-5864057.50000000	-5493961.00000000	-9390096.00000000	-5744849.00000000	-15858340.00000000	-17133362.00000000	-13071385.00000000	-17211598.00000000	-14212999.00000000	-14994316.00000000	-25772014.00000000	-23375854.00000000	-17408714.00000000
240.75123596	-6465092.00000000	-10606813.00000000	-10225514.00000000	-12365536.00000000	-13510522.00000000	-14723658.00000000	-6119359.50000000	-7209246.50000000	-10677875.00000000	-15202439.00000000	-6788301.50000000	-5175321.50000000	-21131892.00000000	-12392523.00000000	-6269914.00000000	-11207450.00000000	-13344253.00000000	-11019428.00000000	-8257948.00000000	-10928481.00000000	-14665633.00000000	-6650538.50000000	-21644560.00000000	-23310768.00000000	-12896639.00000000	-13533047.00000000	-12395830.00000000	-10951386.00000000	-12772482.00000000	-7988175.00000000	-7765142.00000000	-12274497.00000000	-12776866.00000000	-9877687.00000000	-14257985.00000000	-8400052.00000000	-5437985.00000000	-5600701.50000000	-8760994.00000000	-5812897.50000000	-16488915.00000000	-17310480.00000000	-13484405.00000000	-17059950.00000000	-14111826.00000000	-14779018.00000000	-25087962.00000000	-23106888.00000000	-17760412.00000000
240.71939087	-6002480.50000000	-10696365.00000000	-10502047.00000000	-12402046.00000000	-13735254.00000000	-14009935.00000000	-6345711.00000000	-6406370.00000000	-11666792.00000000	-15536836.00000000	-6686556.00000000	-5310846.00000000	-20806044.00000000	-12118655.00000000	-6256599.50000000	-11316267.00000000	-13768743.00000000	-11464435.00000000	-8440060.00000000	-10865852.00000000	-14442999.00000000	-6823681.00000000	-21818424.00000000	-23913996.00000000	-12446878.00000000	-13971916.00000000	-12985826.00000000	-11128592.00000000	-12820869.00000000	-7267093.50000000	-7699478.50000000	-11674491.00000000	-13069232.00000000	-10076096.00000000	-13860486.00000000	-8534413.00000000	-4965083.50000000	-5744560.50000000	-8459908.00000000	-5963883.00000000	-17183150.00000000	-17405896.00000000	-13866236.00000000	-17190706.00000000	-14009923.00000000	-14575205.00000000	-24398328.00000000	-23202542.00000000	-18212236.00000000
240.68756104	-5440610.50000000	-10825077.00000000	-10587374.00000000	-12421530.00000000	-13894033.00000000	-12856198.00000000	-6595526.50000000	-5736280.50000000	-12358739.00000000	-16058929.00000000	-6732626.00000000	-5542912.50000000	-20458010.00000000	-12003795.00000000	-6154235.00000000	-11332276.00000000	-13982162.00000000	-11767938.00000000	-8674091.00000000	-10601887.00000000	-14235998.00000000	-7063360.00000000	-21863354.00000000	-24537434.00000000	-11883152.00000000	-14318151.00000000	-13542542.00000000	-11225857.00000000	-12705131.00000000	-6517073.50000000	-7617159.00000000	-11024659.00000000	-13337778.00000000	-10170547.00000000	-13617315.00000000	-8693398.00000000	-4451789.00000000	-5938244.50000000	-8481498.00000000	-6213531.00000000	-17789394.00000000	-17401326.00000000	-14121733.00000000	-17447452.00000000	-13979933.00000000	-14428310.00000000	-23875598.00000000	-23579734.00000000	-18654506.00000000
240.65570068	-4808619.50000000	-11060572.00000000	-10501381.00000000	-12462226.00000000	-13960323.00000000	-11395125.00000000	-6847723.00000000	-5255632.00000000	-12616489.00000000	-16615939.00000000	-6857805.50000000	-5826347.00000000	-20135302.00000000	-12010796.00000000	-5983288.00000000	-11210640.00000000	-14020421.00000000	-11968052.00000000	-8907445.00000000	-10233253.00000000	-13995415.00000000	-7338520.00000000	-21846808.00000000	-24964902.00000000	-11286370.00000000	-14583704.00000000	-13953248.00000000	-11270133.00000000	-12378632.00000000	-5785127.00000000	-7505203.00000000	-10428935.00000000	-13544464.00000000	-10193810.00000000	-13508686.00000000	-8917113.00000000	-3926958.00000000	-6175758.00000000	-8756329.00000000	-6534858.50000000	-18231898.00000000	-17342958.00000000	-14255976.00000000	-17660078.00000000	-14007206.00000000	-14387183.00000000	-23590034.00000000	-24127236.00000000	-18979756.00000000
240.62387085	-4228045.50000000	-11427299.00000000	-10275405.00000000	-12617603.00000000	-13945182.00000000	-9850382.00000000	-7057510.00000000	-4977762.00000000	-12458666.00000000	-17065344.00000000	-6958473.50000000	-6170874.00000000	-19867138.00000000	-12118437.00000000	-5839579.00000000	-10944191.00000000	-13939260.00000000	-12123630.00000000	-9084243.00000000	-9841996.00000000	-13722548.00000000	-7637044.50000000	-21865692.00000000	-25057986.00000000	-10775759.00000000	-14786701.00000000	-14163465.00000000	-11290409.00000000	-11906337.00000000	-5101796.00000000	-7360666.00000000	-9999543.00000000	-13661487.00000000	-10223175.00000000	-13470124.00000000	-9231277.00000000	-3473362.00000000	-6423619.00000000	-9190273.00000000	-6873802.50000000	-18523122.00000000	-17277214.00000000	-14369018.00000000	-17719206.00000000	-14004058.00000000	-14489301.00000000	-23492326.00000000	-24774350.00000000	-19166926.00000000
240.59204102	-3839614.75000000	-11904886.00000000	-9934120.00000000	-12947178.00000000	-13899925.00000000	-8506075.00000000	-7193158.00000000	-4910727.50000000	-12004233.00000000	-17344996.00000000	-6942509.00000000	-6610644.00000000	-19663670.00000000	-12344427.00000000	-5825803.50000000	-10584681.00000000	-13774383.00000000	-12266461.00000000	-9150327.00000000	-9469433.00000000	-13460547.00000000	-7974378.00000000	-21985514.00000000	-24833228.00000000	-10435719.00000000	-14927466.00000000	-14181098.00000000	-11307068.00000000	-11434934.00000000	-4487039.50000000	-7210094.50000000	-9803407.00000000	-13648487.00000000	-10306959.00000000	-13394021.00000000	-9633592.00000000	-3193204.00000000	-6630475.50000000	-9692230.00000000	-7168720.00000000	-18721856.00000000	-17201052.00000000	-14542730.00000000	-17587770.00000000	-13886631.00000000	-14747732.00000000	-23470160.00000000	-25489218.00000000	-19281772.00000000
240.56019592	-3717528.75000000	-12443741.00000000	-9486544.00000000	-13406158.00000000	-13877124.00000000	-7632982.50000000	-7256865.50000000	-5033060.00000000	-11401825.00000000	-17462786.00000000	-6772041.00000000	-7131123.00000000	-19508986.00000000	-12731834.00000000	-5968855.00000000	-10238007.00000000	-13537645.00000000	-12395535.00000000	-9058114.00000000	-9134127.00000000	-13250206.00000000	-8366628.50000000	-22199636.00000000	-24410936.00000000	-10265657.00000000	-14988569.00000000	-14054432.00000000	-11321228.00000000	-11134883.00000000	-3954127.00000000	-7102492.00000000	-9822518.00000000	-13445063.00000000	-10434948.00000000	-13156296.00000000	-10089404.00000000	-3139545.50000000	-6749900.00000000	-10184871.00000000	-7373711.50000000	-18875224.00000000	-17074148.00000000	-14739901.00000000	-17288162.00000000	-13638265.00000000	-15137988.00000000	-23424270.00000000	-26232770.00000000	-19390646.00000000
240.52836609	-3847371.25000000	-12979354.00000000	-8933362.00000000	-13869689.00000000	-13887036.00000000	-7367024.50000000	-7261284.00000000	-5249400.50000000	-10767776.00000000	-17448808.00000000	-6478106.50000000	-7634053.00000000	-19367100.00000000	-13318561.00000000	-6203114.00000000	-10017674.00000000	-13239074.00000000	-12504862.00000000	-8781369.00000000	-8873032.00000000	-13100563.00000000	-8797070.00000000	-22442800.00000000	-23910652.00000000	-10190061.00000000	-14970928.00000000	-13848235.00000000	-11314522.00000000	-11132657.00000000	-3514655.25000000	-7082872.50000000	-9962558.00000000	-12998495.00000000	-10581158.00000000	-12678633.00000000	-10532003.00000000	-3283131.50000000	-6763797.00000000	-10608273.00000000	-7474095.50000000	-18980988.00000000	-16874874.00000000	-14832666.00000000	-16898760.00000000	-13303600.00000000	-15596986.00000000	-23313178.00000000	-26931618.00000000	-19480298.00000000
240.49650574	-4162053.50000000	-13445928.00000000	-8289485.50000000	-14233671.00000000	-13890290.00000000	-7624715.00000000	-7199145.00000000	-5406429.50000000	-10145373.00000000	-17341042.00000000	-6138199.00000000	-7978880.50000000	-19209018.00000000	-14111782.00000000	-6426274.00000000	-9986612.00000000	-12896654.00000000	-12608639.00000000	-8333974.00000000	-8752299.00000000	-12995499.00000000	-9217796.00000000	-22642128.00000000	-23395360.00000000	-10111137.00000000	-14931825.00000000	-13627579.00000000	-11265085.00000000	-11456599.00000000	-3179934.25000000	-7172736.00000000	-10109847.00000000	-12312068.00000000	-10761723.00000000	-11988773.00000000	-10871920.00000000	-3542106.75000000	-6693667.50000000	-10926963.00000000	-7480417.00000000	-18985600.00000000	-16638906.00000000	-14734489.00000000	-16541701.00000000	-12936154.00000000	-16053943.00000000	-23152666.00000000	-27496330.00000000	-19467566.00000000
240.46467590	-4572435.00000000	-13796410.00000000	-7603393.00000000	-14492379.00000000	-13824272.00000000	-8153119.50000000	-7052393.50000000	-5379906.00000000	-9507115.00000000	-17208742.00000000	-5832575.00000000	-8060209.50000000	-19034510.00000000	-15074991.00000000	-6561401.00000000	-10135324.00000000	-12522638.00000000	-12741861.00000000	-7776620.00000000	-8822357.00000000	-12913236.00000000	-9588223.00000000	-22758448.00000000	-22884428.00000000	-9963950.00000000	-14973322.00000000	-13441129.00000000	-11164804.00000000	-12023286.00000000	-2954999.75000000	-7366900.50000000	-10193178.00000000	-11472763.00000000	-11034409.00000000	-11222713.00000000	-11028905.00000000	-3837932.25000000	-6590541.00000000	-11139622.00000000	-7408934.00000000	-18814634.00000000	-16441215.00000000	-14496640.00000000	-16336156.00000000	-12563392.00000000	-16483575.00000000	-22988782.00000000	-27858262.00000000	-19282392.00000000
240.43284607	-4967413.50000000	-14018204.00000000	-6946311.50000000	-14719817.00000000	-13631157.00000000	-8697034.00000000	-6829887.50000000	-5156906.00000000	-8810060.00000000	-17155038.00000000	-5609712.50000000	-7852417.00000000	-18855452.00000000	-16127565.00000000	-6574249.50000000	-10407816.00000000	-12114196.00000000	-12942545.00000000	-7199902.00000000	-9059667.00000000	-12831541.00000000	-9905957.00000000	-22788618.00000000	-22384820.00000000	-9749308.00000000	-15176945.00000000	-13304627.00000000	-11018316.00000000	-12670991.00000000	-2834162.50000000	-7632265.00000000	-10197355.00000000	-10628017.00000000	-11439085.00000000	-10554771.00000000	-10980926.00000000	-4125915.75000000	-6503246.50000000	-11275450.00000000	-7272630.00000000	-18417246.00000000	-16339256.00000000	-14272249.00000000	-16340612.00000000	-12195672.00000000	-16929752.00000000	-22868068.00000000	-27988074.00000000	-18935496.00000000
240.40098572	-5225888.00000000	-14125934.00000000	-6368695.50000000	-14987691.00000000	-13273545.00000000	-9144664.00000000	-6580812.50000000	-4836761.00000000	-8068875.00000000	-17265974.00000000	-5479037.50000000	-7397735.50000000	-18653126.00000000	-17155832.00000000	-6461720.50000000	-10741397.00000000	-11668406.00000000	-13234717.00000000	-6689201.50000000	-9364987.00000000	-12724983.00000000	-10193025.00000000	-22742768.00000000	-21902750.00000000	-9537304.00000000	-15544164.00000000	-13201148.00000000	-10829230.00000000	-13219398.00000000	-2811720.50000000	-7901595.00000000	-10120425.00000000	-9923392.00000000	-11949691.00000000	-10106052.00000000	-10791025.00000000	-4385888.00000000	-6440194.50000000	-11365007.00000000	-7092098.50000000	-17796668.00000000	-16329239.00000000	-14191373.00000000	-16536829.00000000	-11850098.00000000	-17460258.00000000	-22820504.00000000	-27887978.00000000	-18513548.00000000
240.36915588	-5274582.50000000	-14134596.00000000	-5863623.50000000	-15311493.00000000	-12752228.00000000	-9533652.00000000	-6361483.50000000	-4555442.50000000	-7382102.50000000	-17546472.00000000	-5421748.00000000	-6770162.50000000	-18365814.00000000	-18031924.00000000	-6250242.00000000	-11085892.00000000	-11198223.00000000	-13625005.00000000	-6294832.50000000	-9632028.00000000	-12574158.00000000	-10455768.00000000	-22627094.00000000	-21446058.00000000	-9435552.00000000	-16004401.00000000	-13104867.00000000	-10597667.00000000	-13530821.00000000	-2901963.25000000	-8082817.50000000	-9926828.00000000	-9443909.00000000	-12490314.00000000	-9898623.00000000	-10572716.00000000	-4596559.50000000	-6350548.50000000	-11402045.00000000	-6907189.00000000	-17007126.00000000	-16349551.00000000	-14267165.00000000	-16865512.00000000	-11557056.00000000	-18084170.00000000	-22859142.00000000	-27575802.00000000	-18125364.00000000
240.33731079	-5150767.00000000	-14040703.00000000	-5384263.50000000	-15665618.00000000	-12126524.00000000	-9944195.00000000	-6193541.00000000	-4405903.50000000	-6883725.00000000	-17907912.00000000	-5400121.00000000	-6056604.00000000	-17940220.00000000	-18633518.00000000	-6000677.00000000	-11402570.00000000	-10716622.00000000	-14111863.00000000	-6030283.00000000	-9825025.00000000	-12380664.00000000	-10670705.00000000	-22442596.00000000	-21034038.00000000	-9525638.00000000	-16482321.00000000	-13008341.00000000	-10335061.00000000	-13561038.00000000	-3142255.50000000	-8103051.00000000	-9556036.00000000	-9193603.00000000	-12988569.00000000	-9877136.00000000	-10410144.00000000	-4722225.00000000	-6142448.00000000	-11337705.00000000	-6766076.50000000	-16127570.00000000	-16323472.00000000	-14402387.00000000	-17269560.00000000	-11352132.00000000	-18716018.00000000	-22990604.00000000	-27079474.00000000	-17854034.00000000
240.30548096	-4994702.00000000	-13830670.00000000	-4910981.00000000	-16024108.00000000	-11503872.00000000	-10405574.00000000	-6060382.50000000	-4415104.00000000	-6662288.00000000	-18221046.00000000	-5361252.50000000	-5358475.00000000	-17403686.00000000	-18865574.00000000	-5786788.00000000	-11659795.00000000	-10202350.00000000	-14694636.00000000	-5895962.50000000	-9994754.00000000	-12162809.00000000	-10815436.00000000	-22187504.00000000	-20700322.00000000	-9801912.00000000	-16951230.00000000	-12927867.00000000	-10073771.00000000	-13384057.00000000	-3562961.50000000	-7963845.50000000	-8985616.00000000	-9114183.00000000	-13401993.00000000	-9960853.00000000	-10305023.00000000	-4723895.50000000	-5731105.50000000	-11129077.00000000	-6694031.00000000	-15241403.00000000	-16206673.00000000	-14465560.00000000	-17706872.00000000	-11268815.00000000	-19229444.00000000	-23220076.00000000	-26445194.00000000	-17734284.00000000
240.27362061	-4959061.00000000	-13504584.00000000	-4503815.00000000	-16372448.00000000	-10979578.00000000	-10892058.00000000	-5940635.00000000	-4574622.00000000	-6716546.00000000	-18386876.00000000	-5247697.50000000	-4785367.50000000	-16875064.00000000	-18690044.00000000	-5648394.50000000	-11829469.00000000	-9598988.00000000	-15371013.00000000	-5897308.50000000	-10227499.00000000	-11932144.00000000	-10904542.00000000	-21854014.00000000	-20467912.00000000	-10163726.00000000	-17417434.00000000	-12884698.00000000	-9851837.00000000	-13161844.00000000	-4144762.75000000	-7753391.00000000	-8283377.00000000	-9122138.00000000	-13699404.00000000	-10077725.00000000	-10204553.00000000	-4589279.50000000	-5090942.00000000	-10804911.00000000	-6666814.50000000	-14433353.00000000	-16008712.00000000	-14366191.00000000	-18148008.00000000	-11326197.00000000	-19548008.00000000	-23539388.00000000	-25747154.00000000	-17741044.00000000
240.24179077	-5106838.00000000	-13089618.00000000	-4281011.00000000	-16695298.00000000	-10571986.00000000	-11366721.00000000	-5837518.00000000	-4876988.50000000	-6971681.00000000	-18374656.00000000	-5020948.50000000	-4421711.00000000	-16489741.00000000	-18157000.00000000	-5567355.50000000	-11878505.00000000	-8867667.00000000	-16125266.00000000	-6030467.00000000	-10580845.00000000	-11685587.00000000	-10981786.00000000	-21429202.00000000	-20318202.00000000	-10476102.00000000	-17859532.00000000	-12883851.00000000	-9686890.00000000	-13051424.00000000	-4806035.50000000	-7591100.00000000	-7590201.00000000	-9146707.00000000	-13841377.00000000	-10167801.00000000	-10079129.00000000	-4361672.00000000	-4286357.00000000	-10477544.00000000	-6610815.50000000	-13781812.00000000	-15779770.00000000	-14090651.00000000	-18586978.00000000	-11502424.00000000	-19681712.00000000	-23905340.00000000	-25083194.00000000	-17788504.00000000
240.20996094	-5376592.50000000	-12632066.00000000	-4338759.50000000	-16976948.00000000	-10226485.00000000	-11797537.00000000	-5776119.50000000	-5319133.00000000	-7322777.00000000	-18216764.00000000	-4683309.00000000	-4284515.00000000	-16308675.00000000	-17406908.00000000	-5497383.00000000	-11765385.00000000	-8043285.50000000	-16923148.00000000	-6249489.50000000	-11055088.00000000	-11431811.00000000	-11073957.00000000	-20911974.00000000	-20198236.00000000	-10649070.00000000	-18196406.00000000	-12909849.00000000	-9569073.00000000	-13104519.00000000	-5439569.50000000	-7545713.50000000	-7046784.50000000	-9158343.00000000	-13798415.00000000	-10180711.00000000	-9962430.00000000	-4139753.50000000	-3465672.00000000	-10273633.00000000	-6432565.00000000	-13327035.00000000	-15576138.00000000	-13699696.00000000	-19052334.00000000	-11718395.00000000	-19681856.00000000	-24234726.00000000	-24549136.00000000	-17762416.00000000
240.17810059	-5626375.50000000	-12177155.00000000	-4687900.50000000	-17216114.00000000	-9894699.00000000	-12140823.00000000	-5779691.50000000	-5875762.00000000	-7666441.00000000	-17982910.00000000	-4278090.00000000	-4310289.50000000	-16298155.00000000	-16619867.00000000	-5413843.00000000	-11459732.00000000	-7228940.50000000	-17722210.00000000	-6460584.50000000	-11604606.00000000	-11218389.00000000	-11160960.00000000	-20337018.00000000	-20073150.00000000	-10666834.00000000	-18323778.00000000	-12938391.00000000	-9479315.00000000	-13246157.00000000	-5969833.50000000	-7595892.50000000	-6730360.50000000	-9175022.00000000	-13587259.00000000	-10089386.00000000	-9909261.00000000	-4033555.25000000	-2812118.25000000	-10240553.00000000	-6065320.50000000	-13038509.00000000	-15430927.00000000	-13297294.00000000	-19579182.00000000	-11872393.00000000	-19574678.00000000	-24434832.00000000	-24204606.00000000	-17585930.00000000
240.14627075	-5711726.00000000	-11749469.00000000	-5260320.00000000	-17420258.00000000	-9603195.00000000	-12346809.00000000	-5850038.00000000	-6476433.50000000	-7917201.50000000	-17752590.00000000	-3865564.00000000	-4389823.50000000	-16386370.00000000	-15932138.00000000	-5326426.00000000	-10976598.00000000	-6528739.00000000	-18482984.00000000	-6565737.50000000	-12166347.00000000	-11115575.00000000	-11200196.00000000	-19778956.00000000	-19971398.00000000	-10553192.00000000	-18184114.00000000	-12949497.00000000	-9409647.00000000	-13356282.00000000	-6380034.50000000	-7661522.00000000	-6645503.50000000	-9237385.00000000	-13276323.00000000	-9913267.00000000	-9921889.00000000	-4099437.00000000	-2462070.75000000	-10316896.00000000	-5512187.00000000	-12828893.00000000	-15352040.00000000	-12978220.00000000	-20147902.00000000	-11917105.00000000	-19343548.00000000	-24453264.00000000	-24054280.00000000	-17270192.00000000
240.11442566	-5554972.50000000	-11344449.00000000	-5960586.50000000	-17573726.00000000	-9430426.00000000	-12406451.00000000	-5961375.00000000	-7016595.00000000	-8024366.00000000	-17589426.00000000	-3491473.75000000	-4428604.50000000	-16521298.00000000	-15380821.00000000	-5250374.00000000	-10385733.00000000	-5988015.00000000	-19159440.00000000	-6521361.50000000	-12687827.00000000	-11166151.00000000	-11181017.00000000	-19322944.00000000	-19967686.00000000	-10328699.00000000	-17804040.00000000	-12929858.00000000	-9366609.00000000	-13375743.00000000	-6688300.00000000	-7671749.00000000	-6752166.00000000	-9368666.00000000	-12949395.00000000	-9723588.00000000	-9930860.00000000	-4305449.50000000	-2432026.50000000	-10393730.00000000	-4861224.50000000	-12622547.00000000	-15346719.00000000	-12777196.00000000	-20654808.00000000	-11906846.00000000	-18962768.00000000	-24308640.00000000	-24060320.00000000	-16896520.00000000
240.08259583	-5185095.00000000	-10941054.00000000	-6701550.00000000	-17625718.00000000	-9416884.00000000	-12385150.00000000	-6062510.50000000	-7401498.00000000	-7986420.00000000	-17518538.00000000	-3168336.00000000	-4389482.50000000	-16670588.00000000	-14919241.00000000	-5187793.50000000	-9772291.00000000	-5597534.50000000	-19674930.00000000	-6355245.00000000	-13145449.00000000	-11357394.00000000	-11152471.00000000	-19021148.00000000	-20112006.00000000	-10014680.00000000	-17271650.00000000	-12861233.00000000	-9365992.00000000	-13334867.00000000	-6903573.00000000	-7614365.00000000	-6990222.00000000	-9557470.00000000	-12664821.00000000	-9613781.00000000	-9853108.00000000	-4559693.00000000	-2611474.25000000	-10404363.00000000	-4256349.00000000	-12421572.00000000	-15445900.00000000	-12655655.00000000	-20962394.00000000	-11955869.00000000	-18431632.00000000	-24079026.00000000	-24174788.00000000	-16541118.00000000
240.05073547	-4731448.00000000	-10535181.00000000	-7403748.00000000	-17528562.00000000	-9512930.00000000	-12388843.00000000	-6085511.00000000	-7590055.50000000	-7843884.00000000	-17515054.00000000	-2880385.25000000	-4292560.00000000	-16789292.00000000	-14481901.00000000	-5151862.50000000	-9182052.00000000	-5341547.00000000	-19920522.00000000	-6129154.50000000	-13541877.00000000	-11642740.00000000	-11196222.00000000	-18869844.00000000	-20370838.00000000	-9671820.00000000	-16684302.00000000	-12705291.00000000	-9434022.00000000	-13292310.00000000	-7008864.50000000	-7537319.00000000	-7289908.00000000	-9783222.00000000	-12444031.00000000	-9647183.00000000	-9664801.00000000	-4778128.50000000	-2840831.50000000	-10360859.00000000	-3836408.75000000	-12303056.00000000	-15698818.00000000	-12541154.00000000	-20989456.00000000	-12140790.00000000	-17772674.00000000	-23865104.00000000	-24364988.00000000	-16216385.00000000
240.01890564	-4360310.50000000	-10168750.00000000	-7995408.00000000	-17285604.00000000	-9621636.00000000	-12483826.00000000	-5963824.50000000	-7604453.00000000	-7650045.50000000	-17515052.00000000	-2610953.75000000	-4185654.75000000	-16820528.00000000	-14037922.00000000	-5200086.00000000	-8610964.00000000	-5225446.50000000	-19802126.00000000	-5892886.00000000	-13879477.00000000	-11976775.00000000	-11369970.00000000	-18822910.00000000	-20636544.00000000	-9411997.00000000	-16113942.00000000	-12406713.00000000	-9609197.00000000	-13267825.00000000	-6985355.50000000	-7509444.00000000	-7585963.00000000	-10054586.00000000	-12281798.00000000	-9813573.00000000	-9415932.00000000	-4934480.00000000	-3017421.50000000	-10318759.00000000	-3682671.25000000	-12349418.00000000	-16138118.00000000	-12386814.00000000	-20753182.00000000	-12443361.00000000	-17009690.00000000	-23759784.00000000	-24615774.00000000	-15889368.00000000
239.98707581	-4182540.00000000	-9917771.00000000	-8442729.00000000	-16944740.00000000	-9681226.00000000	-12647775.00000000	-5655073.00000000	-7502411.00000000	-7446542.50000000	-17449288.00000000	-2377141.00000000	-4117590.50000000	-16740349.00000000	-13599663.00000000	-5421332.00000000	-8053335.50000000	-5254715.00000000	-19309594.00000000	-5677129.00000000	-14130300.00000000	-12320545.00000000	-11666323.00000000	-18824620.00000000	-20796672.00000000	-9351375.00000000	-15605784.00000000	-11929702.00000000	-9925961.00000000	-13240413.00000000	-6843632.00000000	-7567626.50000000	-7839700.00000000	-10411157.00000000	-12153138.00000000	-10024797.00000000	-9177918.00000000	-5058353.00000000	-3138818.75000000	-10320330.00000000	-3808623.50000000	-12580277.00000000	-16748013.00000000	-12197427.00000000	-20329632.00000000	-12781563.00000000	-16159218.00000000	-23830516.00000000	-24913616.00000000	-15554800.00000000
239.95523071	-4201157.50000000	-9834903.00000000	-8783221.00000000	-16541311.00000000	-9695925.00000000	-12794630.00000000	-5154790.00000000	-7342472.50000000	-7263767.00000000	-17284760.00000000	-2243741.75000000	-4129269.00000000	-16588560.00000000	-13206026.00000000	-5875619.00000000	-7553798.00000000	-5400603.00000000	-18544980.00000000	-5518011.00000000	-14235452.00000000	-12631891.00000000	-12011607.00000000	-18832358.00000000	-20803996.00000000	-9543264.00000000	-15190206.00000000	-11309212.00000000	-10382319.00000000	-13192631.00000000	-6621872.50000000	-7683803.00000000	-8046503.50000000	-10879555.00000000	-12015598.00000000	-10158858.00000000	-8976982.00000000	-5198458.00000000	-3252322.75000000	-10372264.00000000	-4185906.25000000	-12945766.00000000	-17468198.00000000	-12002701.00000000	-19789220.00000000	-13078019.00000000	-15244089.00000000	-24093876.00000000	-25227062.00000000	-15280315.00000000
239.92338562	-4344624.50000000	-9894529.00000000	-9108714.00000000	-16064413.00000000	-9698799.00000000	-12841221.00000000	-4494106.50000000	-7172121.50000000	-7133291.00000000	-17049530.00000000	-2294333.25000000	-4249157.50000000	-16436243.00000000	-12911177.00000000	-6544190.00000000	-7198841.00000000	-5601447.00000000	-17674334.00000000	-5468349.00000000	-14142083.00000000	-12884592.00000000	-12299272.00000000	-18818956.00000000	-20693106.00000000	-9955183.00000000	-14884641.00000000	-10668689.00000000	-10920812.00000000	-13133806.00000000	-6353044.00000000	-7779986.00000000	-8216303.50000000	-11430700.00000000	-11825713.00000000	-10131812.00000000	-8767793.00000000	-5388591.00000000	-3375503.50000000	-10465696.00000000	-4769525.00000000	-13372432.00000000	-18230178.00000000	-11813224.00000000	-19178882.00000000	-13288073.00000000	-14310535.00000000	-24478234.00000000	-25495926.00000000	-15170155.00000000
239.89154053	-4551253.50000000	-9997930.00000000	-9494604.00000000	-15488848.00000000	-9708605.00000000	-12754927.00000000	-3729329.75000000	-7036861.00000000	-7086073.00000000	-16822366.00000000	-2572074.00000000	-4477417.50000000	-16318646.00000000	-12776442.00000000	-7335608.50000000	-7048677.00000000	-5802954.50000000	-16833934.00000000	-5573682.50000000	-13848168.00000000	-13110777.00000000	-12439236.00000000	-18766344.00000000	-20537648.00000000	-10507999.00000000	-14684643.00000000	-10172757.00000000	-11446250.00000000	-13080596.00000000	-6043587.00000000	-7788817.50000000	-8351697.00000000	-11983906.00000000	-11569536.00000000	-9951836.00000000	-8461508.00000000	-5631647.50000000	-3474488.75000000	-10606035.00000000	-5499309.50000000	-13806998.00000000	-18988878.00000000	-11610193.00000000	-18552308.00000000	-13380408.00000000	-13431003.00000000	-24813784.00000000	-25638006.00000000	-15280367.00000000
239.85971069	-4819008.50000000	-10041475.00000000	-9936808.00000000	-14823801.00000000	-9728378.00000000	-12557433.00000000	-2935070.50000000	-6983845.50000000	-7134368.50000000	-16691829.00000000	-3038793.50000000	-4768747.50000000	-16205041.00000000	-12842641.00000000	-8132388.00000000	-7077108.50000000	-5997788.00000000	-16060650.00000000	-5839095.00000000	-13417732.00000000	-13404050.00000000	-12400411.00000000	-18664192.00000000	-20388586.00000000	-11133119.00000000	-14561407.00000000	-9943977.00000000	-11868927.00000000	-13034265.00000000	-5694577.50000000	-7714521.50000000	-8457078.00000000	-12447173.00000000	-11280065.00000000	-9712811.00000000	-7985734.50000000	-5893487.00000000	-3508520.25000000	-10820584.00000000	-6292217.00000000	-14225275.00000000	-19719304.00000000	-11376687.00000000	-17989570.00000000	-13327837.00000000	-12690115.00000000	-24892918.00000000	-25579214.00000000	-15567802.00000000
239.82788086	-5178570.00000000	-9988248.00000000	-10357225.00000000	-14109264.00000000	-9764487.00000000	-12301519.00000000	-2201088.50000000	-7046145.00000000	-7259665.00000000	-16712237.00000000	-3593999.25000000	-5042237.50000000	-16035374.00000000	-13091306.00000000	-8830927.00000000	-7182294.00000000	-6229416.00000000	-15293802.00000000	-6222366.00000000	-12958168.00000000	-13854236.00000000	-12224433.00000000	-18512588.00000000	-20244802.00000000	-11792338.00000000	-14475627.00000000	-10011274.00000000	-12140311.00000000	-12985056.00000000	-5343337.50000000	-7639190.00000000	-8569835.00000000	-12748615.00000000	-11023043.00000000	-9525407.00000000	-7340719.50000000	-6104082.50000000	-3470657.75000000	-11138114.00000000	-7051838.50000000	-14618106.00000000	-20388196.00000000	-11129332.00000000	-17569632.00000000	-13137317.00000000	-12162063.00000000	-24584908.00000000	-25295466.00000000	-15923508.00000000
239.79602051	-5633691.00000000	-9881893.00000000	-10668318.00000000	-13372902.00000000	-9824774.00000000	-12042669.00000000	-1622917.50000000	-7223069.00000000	-7420274.50000000	-16884756.00000000	-4141692.75000000	-5226792.00000000	-15780280.00000000	-13438139.00000000	-9354767.00000000	-7263466.00000000	-6558861.50000000	-14441398.00000000	-6655236.50000000	-12579974.00000000	-14473375.00000000	-11999360.00000000	-18320134.00000000	-20076798.00000000	-12450493.00000000	-14396846.00000000	-10324630.00000000	-12262572.00000000	-12922225.00000000	-5071732.00000000	-7666964.00000000	-8766129.00000000	-12842793.00000000	-10866730.00000000	-9438275.00000000	-6618755.50000000	-6179051.00000000	-3373979.00000000	-11558263.00000000	-7695226.50000000	-14978866.00000000	-20939464.00000000	-10911115.00000000	-17323738.00000000	-12875564.00000000	-11890241.00000000	-23923074.00000000	-24836222.00000000	-16258670.00000000
239.76419067	-6140770.50000000	-9799790.00000000	-10831580.00000000	-12623653.00000000	-9901613.00000000	-11814998.00000000	-1281072.25000000	-7479884.50000000	-7567071.50000000	-17169498.00000000	-4645840.50000000	-5309437.50000000	-15465362.00000000	-13782950.00000000	-9659594.00000000	-7296846.00000000	-7018089.00000000	-13464327.00000000	-7069193.00000000	-12360276.00000000	-15192828.00000000	-11807552.00000000	-18097590.00000000	-19877026.00000000	-13040757.00000000	-14309043.00000000	-10802435.00000000	-12277528.00000000	-12821213.00000000	-4961730.50000000	-7859332.00000000	-9113744.00000000	-12718343.00000000	-10861553.00000000	-9417308.00000000	-5971205.50000000	-6065229.00000000	-3216854.00000000	-12037957.00000000	-8171846.50000000	-15296493.00000000	-21319194.00000000	-10756174.00000000	-17220556.00000000	-12637163.00000000	-11878862.00000000	-23090608.00000000	-24304910.00000000	-16566087.00000000
239.73234558	-6641251.50000000	-9793326.00000000	-10863148.00000000	-11904086.00000000	-9979406.00000000	-11619262.00000000	-1217607.50000000	-7768679.50000000	-7652840.00000000	-17508510.00000000	-5128247.50000000	-5340717.50000000	-15148103.00000000	-14078375.00000000	-9746500.00000000	-7346639.50000000	-7576364.00000000	-12425620.00000000	-7412421.00000000	-12319346.00000000	-15925227.00000000	-11683377.00000000	-17856156.00000000	-19690104.00000000	-13468999.00000000	-14199192.00000000	-11357389.00000000	-12245883.00000000	-12626311.00000000	-5041974.50000000	-8216809.50000000	-9605538.00000000	-12421192.00000000	-11030622.00000000	-9401348.00000000	-5538826.00000000	-5784833.00000000	-2990271.75000000	-12511072.00000000	-8459887.00000000	-15548198.00000000	-21523734.00000000	-10672996.00000000	-17195594.00000000	-12473948.00000000	-12098905.00000000	-22315448.00000000	-23810462.00000000	-16906102.00000000
239.70050049	-7096453.50000000	-9860205.00000000	-10803064.00000000	-11325365.00000000	-10071641.00000000	-11434142.00000000	-1425902.62500000	-8049810.50000000	-7638963.50000000	-17843004.00000000	-5620396.00000000	-5387131.50000000	-14882545.00000000	-14350998.00000000	-9670366.00000000	-7504208.00000000	-8140814.00000000	-11472593.00000000	-7663314.00000000	-12417362.00000000	-16607478.00000000	-11608037.00000000	-17612648.00000000	-19597404.00000000	-13665164.00000000	-14047232.00000000	-11896233.00000000	-12219089.00000000	-12271655.00000000	-5285199.50000000	-8702076.00000000	-10135790.00000000	-12059751.00000000	-11354721.00000000	-9377363.00000000	-5387794.50000000	-5440423.50000000	-2725506.00000000	-12929784.00000000	-8554106.00000000	-15699154.00000000	-21624936.00000000	-10667282.00000000	-17195306.00000000	-12359842.00000000	-12498705.00000000	-21759406.00000000	-23431706.00000000	-17336404.00000000
239.66865540	-7482737.50000000	-9955708.00000000	-10693864.00000000	-11014101.00000000	-10241209.00000000	-11245908.00000000	-1861042.12500000	-8296634.00000000	-7509250.00000000	-18123250.00000000	-6118545.00000000	-5471466.50000000	-14702295.00000000	-14654777.00000000	-9520840.00000000	-7807575.50000000	-8600461.00000000	-10759893.00000000	-7840292.50000000	-12578979.00000000	-17181096.00000000	-11537549.00000000	-17388330.00000000	-19673246.00000000	-13639542.00000000	-13834994.00000000	-12333393.00000000	-12208772.00000000	-11738460.00000000	-5659547.00000000	-9255214.00000000	-10544712.00000000	-11756467.00000000	-11756887.00000000	-9397055.00000000	-5488594.50000000	-5169302.00000000	-2513101.50000000	-13289290.00000000	-8465270.00000000	-15723053.00000000	-21739684.00000000	-10771005.00000000	-17203618.00000000	-12229021.00000000	-13008353.00000000	-21476838.00000000	-23214584.00000000	-17850612.00000000
239.63682556	-7766235.50000000	-10024119.00000000	-10583909.00000000	-11014328.00000000	-10566073.00000000	-11069657.00000000	-2462401.00000000	-8486544.00000000	-7283213.50000000	-18318408.00000000	-6575288.00000000	-5554383.50000000	-14620789.00000000	-15007125.00000000	-9378374.00000000	-8205622.00000000	-8895069.00000000	-10364751.00000000	-7992217.00000000	-12735958.00000000	-17567172.00000000	-11435872.00000000	-17191518.00000000	-19949616.00000000	-13486777.00000000	-13564955.00000000	-12635543.00000000	-12173082.00000000	-11092861.00000000	-6170426.00000000	-9782070.00000000	-10697826.00000000	-11573644.00000000	-12116871.00000000	-9518680.00000000	-5742494.00000000	-5075466.50000000	-2452170.75000000	-13609378.00000000	-8228411.50000000	-15634841.00000000	-21957066.00000000	-11029924.00000000	-17245000.00000000	-12043871.00000000	-13544946.00000000	-21444942.00000000	-23175998.00000000	-18374828.00000000
239.60499573	-7904698.00000000	-10028446.00000000	-10529137.00000000	-11255967.00000000	-11072965.00000000	-10940207.00000000	-3171143.75000000	-8593353.00000000	-7010800.50000000	-18420570.00000000	-6920631.00000000	-5572843.50000000	-14632498.00000000	-15370140.00000000	-9275283.00000000	-8590940.00000000	-9059556.00000000	-10257282.00000000	-8163854.00000000	-12854263.00000000	-17708076.00000000	-11290483.00000000	-16995818.00000000	-20407098.00000000	-13319576.00000000	-13260554.00000000	-12853792.00000000	-12038544.00000000	-10460594.00000000	-6836875.50000000	-10155317.00000000	-10547273.00000000	-11485794.00000000	-12326580.00000000	-9738801.00000000	-6033541.00000000	-5184017.50000000	-2577531.50000000	-13891568.00000000	-7899801.00000000	-15502352.00000000	-22275316.00000000	-11450633.00000000	-17371286.00000000	-11824262.00000000	-14036514.00000000	-21613260.00000000	-23282360.00000000	-18816110.00000000
239.57313538	-7884268.50000000	-9965654.00000000	-10570022.00000000	-11623433.00000000	-11697973.00000000	-10883542.00000000	-3933347.75000000	-8591855.00000000	-6748963.00000000	-18434398.00000000	-7091001.00000000	-5501925.50000000	-14712150.00000000	-15687211.00000000	-9190306.00000000	-8869190.00000000	-9200821.00000000	-10345509.00000000	-8360592.00000000	-12920169.00000000	-17646824.00000000	-11109684.00000000	-16742860.00000000	-20983708.00000000	-13180768.00000000	-12936722.00000000	-13091193.00000000	-11748335.00000000	-9961048.00000000	-7624378.50000000	-10266078.00000000	-10149091.00000000	-11426342.00000000	-12348650.00000000	-9989187.00000000	-6282561.50000000	-5444884.50000000	-2842446.75000000	-14104244.00000000	-7536158.50000000	-15415261.00000000	-22598588.00000000	-11962478.00000000	-17638202.00000000	-11623320.00000000	-14461684.00000000	-21930896.00000000	-23422240.00000000	-19117728.00000000
239.54130554	-7745632.00000000	-9862192.00000000	-10699531.00000000	-12035437.00000000	-12305581.00000000	-10900165.00000000	-4696779.00000000	-8475046.00000000	-6542015.50000000	-18358436.00000000	-7055741.00000000	-5390405.00000000	-14819493.00000000	-15930592.00000000	-9079487.00000000	-9009717.00000000	-9418696.00000000	-10547568.00000000	-8543901.00000000	-12903852.00000000	-17537466.00000000	-10912512.00000000	-16380728.00000000	-21588988.00000000	-13011759.00000000	-12569670.00000000	-13419448.00000000	-11301056.00000000	-9656073.00000000	-8414892.00000000	-10094120.00000000	-9640708.00000000	-11352256.00000000	-12226435.00000000	-10202160.00000000	-6485876.50000000	-5777779.50000000	-3169199.75000000	-14219607.00000000	-7174035.50000000	-15430671.00000000	-22797778.00000000	-12440331.00000000	-18076574.00000000	-11491285.00000000	-14867319.00000000	-22351514.00000000	-23430002.00000000	-19281360.00000000
239.50946045	-7559527.00000000	-9756587.00000000	-10859062.00000000	-12444876.00000000	-12748787.00000000	-10972282.00000000	-5416394.50000000	-8274592.50000000	-6420162.50000000	-18183462.00000000	-6836227.50000000	-5343590.00000000	-14912121.00000000	-16116807.00000000	-8920967.00000000	-9048560.00000000	-9738886.00000000	-10822021.00000000	-8660981.00000000	-12750244.00000000	-17543228.00000000	-10717950.00000000	-15912720.00000000	-22123842.00000000	-12708514.00000000	-12105960.00000000	-13817911.00000000	-10749525.00000000	-9538856.00000000	-9061358.00000000	-9721295.00000000	-9190811.00000000	-11257922.00000000	-12040711.00000000	-10373772.00000000	-6718867.00000000	-6121732.50000000	-3506664.00000000	-14263256.00000000	-6828393.00000000	-15539960.00000000	-22788722.00000000	-12771189.00000000	-18670084.00000000	-11463131.00000000	-15330000.00000000	-22832952.00000000	-23178102.00000000	-19350374.00000000
239.47763062	-7371156.50000000	-9684117.00000000	-10974040.00000000	-12786921.00000000	-12933721.00000000	-11076629.00000000	-6069465.00000000	-8067562.00000000	-6403772.50000000	-17919828.00000000	-6504201.50000000	-5463541.50000000	-14959172.00000000	-16288244.00000000	-8742885.00000000	-9058384.00000000	-10117820.00000000	-11138561.00000000	-8681458.00000000	-12420748.00000000	-17712770.00000000	-10534442.00000000	-15413712.00000000	-22508386.00000000	-12210898.00000000	-11512349.00000000	-14189375.00000000	-10164428.00000000	-9545290.00000000	-9481423.00000000	-9264932.00000000	-8934694.00000000	-11143868.00000000	-11860756.00000000	-10561142.00000000	-7089308.50000000	-6450173.50000000	-3843449.50000000	-14315132.00000000	-6506848.00000000	-15683052.00000000	-22570178.00000000	-12904658.00000000	-19350404.00000000	-11562418.00000000	-15880832.00000000	-23335920.00000000	-22669398.00000000	-19373134.00000000
239.44577026	-7175080.50000000	-9671259.00000000	-10999317.00000000	-12975007.00000000	-12860628.00000000	-11185079.00000000	-6660053.00000000	-7954082.00000000	-6496181.50000000	-17631056.00000000	-6150073.00000000	-5782979.00000000	-14948107.00000000	-16485997.00000000	-8613493.00000000	-9116386.00000000	-10507340.00000000	-11437846.00000000	-8617884.00000000	-11947985.00000000	-17959612.00000000	-10353852.00000000	-14998448.00000000	-22704928.00000000	-11540714.00000000	-10819529.00000000	-14432928.00000000	-9596894.00000000	-9572510.00000000	-9699723.00000000	-8797354.00000000	-8919791.00000000	-11002514.00000000	-11731860.00000000	-10824385.00000000	-7659782.00000000	-6744165.50000000	-4188935.00000000	-14453767.00000000	-6221777.00000000	-15794648.00000000	-22203314.00000000	-12854320.00000000	-20011276.00000000	-11797345.00000000	-16462016.00000000	-23817022.00000000	-22038596.00000000	-19367820.00000000
239.41394043	-6952764.50000000	-9732414.00000000	-10935572.00000000	-12970727.00000000	-12620716.00000000	-11263304.00000000	-7195691.50000000	-8010130.00000000	-6671364.00000000	-17432066.00000000	-5840206.00000000	-6235597.00000000	-14884125.00000000	-16731464.00000000	-8597165.00000000	-9282347.00000000	-10905901.00000000	-11635327.00000000	-8527118.00000000	-11440808.00000000	-18159212.00000000	-10157828.00000000	-14767161.00000000	-22720738.00000000	-10762723.00000000	-10115744.00000000	-14508771.00000000	-9068075.00000000	-9513513.00000000	-9801064.00000000	-8331620.00000000	-9094306.00000000	-10843538.00000000	-11689823.00000000	-11175941.00000000	-8395432.00000000	-6960126.50000000	-4559515.00000000	-14699163.00000000	-5992220.00000000	-15842826.00000000	-21765800.00000000	-12671250.00000000	-20536486.00000000	-12150000.00000000	-16962266.00000000	-24222002.00000000	-21452072.00000000	-19302600.00000000
239.38211060	-6734317.00000000	-9861164.00000000	-10809394.00000000	-12838658.00000000	-12339999.00000000	-11287870.00000000	-7649987.00000000	-8244954.50000000	-6877076.50000000	-17437076.00000000	-5601596.50000000	-6690217.50000000	-14785766.00000000	-17017316.00000000	-8705737.00000000	-9580181.00000000	-11343126.00000000	-11666782.00000000	-8495228.00000000	-11022092.00000000	-18258672.00000000	-9936329.00000000	-14768383.00000000	-22594002.00000000	-9927976.00000000	-9498838.00000000	-14453656.00000000	-8585514.00000000	-9309558.00000000	-9848466.00000000	-7872182.00000000	-9351300.00000000	-10709479.00000000	-11764879.00000000	-11580347.00000000	-9182284.00000000	-7040597.00000000	-4973615.50000000	-15007097.00000000	-5843303.50000000	-15830238.00000000	-21326066.00000000	-12427031.00000000	-20838094.00000000	-12578525.00000000	-17303700.00000000	-24493682.00000000	-20996108.00000000	-19102854.00000000
239.35025024	-6613713.50000000	-10025604.00000000	-10643799.00000000	-12701759.00000000	-12096621.00000000	-11274673.00000000	-7950598.00000000	-8595112.00000000	-7055005.50000000	-17687536.00000000	-5445982.00000000	-7035482.00000000	-14680894.00000000	-17306516.00000000	-8880399.00000000	-9983207.00000000	-11822458.00000000	-11526435.00000000	-8600608.00000000	-10748708.00000000	-18299210.00000000	-9705115.00000000	-14992754.00000000	-22382466.00000000	-9067605.00000000	-9036471.00000000	-14351613.00000000	-8163089.50000000	-8986806.00000000	-9847185.00000000	-7455925.00000000	-9599051.00000000	-10637945.00000000	-11962618.00000000	-11989254.00000000	-9896387.00000000	-6971386.00000000	-5434663.00000000	-15305067.00000000	-5808002.50000000	-15761222.00000000	-20948134.00000000	-12208234.00000000	-20893038.00000000	-13036884.00000000	-17501814.00000000	-24594334.00000000	-20650910.00000000	-18688810.00000000
239.31842041	-6691189.50000000	-10182550.00000000	-10447641.00000000	-12634351.00000000	-11875347.00000000	-11284029.00000000	-8016524.00000000	-8958798.00000000	-7156923.00000000	-18112766.00000000	-5398315.00000000	-7258616.50000000	-14606604.00000000	-17544036.00000000	-9016572.00000000	-10418738.00000000	-12293262.00000000	-11264708.00000000	-8862706.00000000	-10581448.00000000	-18356674.00000000	-9505946.00000000	-15382070.00000000	-22159930.00000000	-8232704.50000000	-8763310.00000000	-14287042.00000000	-7825528.00000000	-8637915.00000000	-9776696.00000000	-7134070.00000000	-9804986.00000000	-10608762.00000000	-12246939.00000000	-12371180.00000000	-10456986.00000000	-6826812.00000000	-5909619.50000000	-15521367.00000000	-5921415.50000000	-15608313.00000000	-20700302.00000000	-12097620.00000000	-20753582.00000000	-13492169.00000000	-17648142.00000000	-24522726.00000000	-20354062.00000000	-18027724.00000000
239.28657532	-6992234.00000000	-10304057.00000000	-10226251.00000000	-12605270.00000000	-11604597.00000000	-11380990.00000000	-7822226.50000000	-9242995.00000000	-7146010.00000000	-18555186.00000000	-5486160.00000000	-7454938.50000000	-14609950.00000000	-17681078.00000000	-9011038.00000000	-10799682.00000000	-12684741.00000000	-10961600.00000000	-9213278.00000000	-10425960.00000000	-18475710.00000000	-9386529.00000000	-15839947.00000000	-22004622.00000000	-7515079.50000000	-8694961.00000000	-14304156.00000000	-7597827.50000000	-8356464.50000000	-9640237.00000000	-6928202.00000000	-9982535.00000000	-10551549.00000000	-12547727.00000000	-12718120.00000000	-10824823.00000000	-6740694.50000000	-6340554.00000000	-15589937.00000000	-6197567.00000000	-15317027.00000000	-20641298.00000000	-12135617.00000000	-20512704.00000000	-13922999.00000000	-17836932.00000000	-24307876.00000000	-20072278.00000000	-17167618.00000000
239.25474548	-7438926.00000000	-10389088.00000000	-9994952.00000000	-12522035.00000000	-11244068.00000000	-11576282.00000000	-7437363.00000000	-9394132.00000000	-6999883.00000000	-18847730.00000000	-5695852.50000000	-7755816.00000000	-14738907.00000000	-17699220.00000000	-8799145.00000000	-11064457.00000000	-12960050.00000000	-10707378.00000000	-9528254.00000000	-10206250.00000000	-18647984.00000000	-9374193.00000000	-16251809.00000000	-21965918.00000000	-7010278.00000000	-8826214.00000000	-14392079.00000000	-7494345.50000000	-8179691.50000000	-9475657.00000000	-6823785.50000000	-10138598.00000000	-10417591.00000000	-12784055.00000000	-13039247.00000000	-10976341.00000000	-6812970.50000000	-6695750.50000000	-15460841.00000000	-6601024.00000000	-14856399.00000000	-20791168.00000000	-12292331.00000000	-20244698.00000000	-14308709.00000000	-18099806.00000000	-23986282.00000000	-19813830.00000000	-16230112.00000000
239.22290039	-7897759.50000000	-10448202.00000000	-9780327.00000000	-12314779.00000000	-10833228.00000000	-11798873.00000000	-7010877.50000000	-9404598.00000000	-6729115.50000000	-18895134.00000000	-5951006.50000000	-8232511.00000000	-15016724.00000000	-17621152.00000000	-8365855.50000000	-11197683.00000000	-13127871.00000000	-10592691.00000000	-9706066.00000000	-9914309.00000000	-18824116.00000000	-9461218.00000000	-16525559.00000000	-22030276.00000000	-6759633.50000000	-9119004.00000000	-14507700.00000000	-7517678.50000000	-8084718.50000000	-9324461.00000000	-6808088.00000000	-10232480.00000000	-10230621.00000000	-12880092.00000000	-13352733.00000000	-10906429.00000000	-7034641.00000000	-7007366.50000000	-15136737.00000000	-7043876.00000000	-14275129.00000000	-21115914.00000000	-12481760.00000000	-19972894.00000000	-14628636.00000000	-18392400.00000000	-23584102.00000000	-19594496.00000000	-15370904.00000000
239.19105530	-8255381.50000000	-10482211.00000000	-9610195.00000000	-11976946.00000000	-10448474.00000000	-11927037.00000000	-6711799.00000000	-9302034.00000000	-6392359.50000000	-18708448.00000000	-6153201.50000000	-8852870.00000000	-15415087.00000000	-17503670.00000000	-7737128.50000000	-11225536.00000000	-13203474.00000000	-10687015.00000000	-9724975.00000000	-9607159.00000000	-18931858.00000000	-9608485.00000000	-16637220.00000000	-22121256.00000000	-6731640.00000000	-9512883.00000000	-14621317.00000000	-7662151.00000000	-8026924.00000000	-9198979.00000000	-6898672.00000000	-10186223.00000000	-10050141.00000000	-12770442.00000000	-13673847.00000000	-10660353.00000000	-7300191.50000000	-7342518.50000000	-14701522.00000000	-7424974.00000000	-13702972.00000000	-21540034.00000000	-12612235.00000000	-19693942.00000000	-14873087.00000000	-18630182.00000000	-23116510.00000000	-19414300.00000000	-14734454.00000000
239.15922546	-8455825.00000000	-10480280.00000000	-9500206.00000000	-11551954.00000000	-10117202.00000000	-11855737.00000000	-6663697.00000000	-9126799.00000000	-6078062.50000000	-18375456.00000000	-6256754.00000000	-9514042.00000000	-15855382.00000000	-17417550.00000000	-6965258.00000000	-11200598.00000000	-13171328.00000000	-11002713.00000000	-9627425.00000000	-9361854.00000000	-18895546.00000000	-9760659.00000000	-16643758.00000000	-22140840.00000000	-6851243.00000000	-9963386.00000000	-14743100.00000000	-7910979.50000000	-7972860.50000000	-9078028.00000000	-7122951.50000000	-9942836.00000000	-9891724.00000000	-12411433.00000000	-13999751.00000000	-10342268.00000000	-7488570.00000000	-7728670.50000000	-14290279.00000000	-7689392.50000000	-13279985.00000000	-21973778.00000000	-12636983.00000000	-19424676.00000000	-15049115.00000000	-18738196.00000000	-22598234.00000000	-19267496.00000000	-14418821.00000000
239.12736511	-8483169.00000000	-10431158.00000000	-9441228.00000000	-11108932.00000000	-9785471.00000000	-11553424.00000000	-6901844.50000000	-8905762.00000000	-5858587.50000000	-17999262.00000000	-6306535.00000000	-10105397.00000000	-16247471.00000000	-17418332.00000000	-6116419.00000000	-11184639.00000000	-12994517.00000000	-11475801.00000000	-9454881.00000000	-9221471.00000000	-18662006.00000000	-9860643.00000000	-16644077.00000000	-22016898.00000000	-7032937.50000000	-10467785.00000000	-14901518.00000000	-8229030.50000000	-7899429.50000000	-8925320.00000000	-7473975.00000000	-9524297.00000000	-9705420.00000000	-11803004.00000000	-14303891.00000000	-10067826.00000000	-7532559.50000000	-8111637.50000000	-14008490.00000000	-7859991.50000000	-13066341.00000000	-22336292.00000000	-12574243.00000000	-19208922.00000000	-15170518.00000000	-18680378.00000000	-22052688.00000000	-19153950.00000000	-14448732.00000000
239.09553528	-8330242.00000000	-10324451.00000000	-9391781.00000000	-10728612.00000000	-9376172.00000000	-11075128.00000000	-7366117.00000000	-8642801.00000000	-5760771.00000000	-17657570.00000000	-6401390.50000000	-10544307.00000000	-16534826.00000000	-17515946.00000000	-5263244.50000000	-11223941.00000000	-12657383.00000000	-11992508.00000000	-9207665.00000000	-9166497.00000000	-18225016.00000000	-9858620.00000000	-16716349.00000000	-21720600.00000000	-7188637.50000000	-11042402.00000000	-15095952.00000000	-8568220.00000000	-7775785.50000000	-8710576.00000000	-7895284.50000000	-9034598.00000000	-9440817.00000000	-11001751.00000000	-14549355.00000000	-9896901.00000000	-7427929.00000000	-8389789.00000000	-13872594.00000000	-8009896.50000000	-13011908.00000000	-22571464.00000000	-12491417.00000000	-19073516.00000000	-15243826.00000000	-18455948.00000000	-21514316.00000000	-19062448.00000000	-14761587.00000000
239.06369019	-7996373.00000000	-10145719.00000000	-9286536.00000000	-10481583.00000000	-8875307.00000000	-10532189.00000000	-7931787.00000000	-8342210.50000000	-5779554.00000000	-17405458.00000000	-6616934.50000000	-10777948.00000000	-16703987.00000000	-17662672.00000000	-4480212.00000000	-11321676.00000000	-12191768.00000000	-12448948.00000000	-8870205.00000000	-9130475.00000000	-17632880.00000000	-9719521.00000000	-16881088.00000000	-21255166.00000000	-7233055.00000000	-11672305.00000000	-15277811.00000000	-8894708.00000000	-7562344.00000000	-8425628.00000000	-8309669.00000000	-8593922.00000000	-9117212.00000000	-10104115.00000000	-14710918.00000000	-9811471.00000000	-7207538.00000000	-8484962.00000000	-13829767.00000000	-8194003.00000000	-13010124.00000000	-22662098.00000000	-12464205.00000000	-18993238.00000000	-15267988.00000000	-18078646.00000000	-21023950.00000000	-18947040.00000000	-15227462.00000000
239.03186035	-7512935.50000000	-9895095.00000000	-9069868.00000000	-10395399.00000000	-8358305.00000000	-10043197.00000000	-8467150.00000000	-8046271.00000000	-5908343.00000000	-17291058.00000000	-6953427.50000000	-10785092.00000000	-16756126.00000000	-17779246.00000000	-3833048.00000000	-11433153.00000000	-11663655.00000000	-12795422.00000000	-8466644.00000000	-9050340.00000000	-16975876.00000000	-9433491.00000000	-17109588.00000000	-20646174.00000000	-7116659.00000000	-12291186.00000000	-15384263.00000000	-9218545.00000000	-7239738.50000000	-8097119.00000000	-8659383.00000000	-8251179.00000000	-8812656.00000000	-9206274.00000000	-14785888.00000000	-9755399.00000000	-6926854.50000000	-8382565.50000000	-13830702.00000000	-8394340.00000000	-12980538.00000000	-22635360.00000000	-12529517.00000000	-18922248.00000000	-15246979.00000000	-17566642.00000000	-20618732.00000000	-18743040.00000000	-15710956.00000000
239.00003052	-6962080.50000000	-9629637.00000000	-8741290.00000000	-10443510.00000000	-7937588.00000000	-9695217.00000000	-8886584.00000000	-7841664.00000000	-6143347.00000000	-17343172.00000000	-7339851.00000000	-10592995.00000000	-16682360.00000000	-17810700.00000000	-3355455.25000000	-11500149.00000000	-11144021.00000000	-13029331.00000000	-8082051.50000000	-8914866.00000000	-16360704.00000000	-9027051.00000000	-17352684.00000000	-19947676.00000000	-6868255.50000000	-12815958.00000000	-15389722.00000000	-9591452.00000000	-6847337.00000000	-7788400.00000000	-8925522.00000000	-7949213.00000000	-8587178.00000000	-8370914.00000000	-14788550.00000000	-9690649.00000000	-6662524.00000000	-8124621.00000000	-13874503.00000000	-8523761.00000000	-12907558.00000000	-22544024.00000000	-12659951.00000000	-18867214.00000000	-15195798.00000000	-16956590.00000000	-20320448.00000000	-18427538.00000000	-16139549.00000000
238.96817017	-6463918.50000000	-9476007.00000000	-8375793.00000000	-10576704.00000000	-7688844.50000000	-9530814.00000000	-9163936.00000000	-7815972.50000000	-6460430.50000000	-17537208.00000000	-7671960.50000000	-10280009.00000000	-16474298.00000000	-17768356.00000000	-3026094.50000000	-11496796.00000000	-10693780.00000000	-13149004.00000000	-7827739.00000000	-8771247.00000000	-15876114.00000000	-8566203.00000000	-17557074.00000000	-19247200.00000000	-6594442.00000000	-13197287.00000000	-15322163.00000000	-10062983.00000000	-6496278.50000000	-7578683.00000000	-9125367.00000000	-7576443.50000000	-8431191.00000000	-7625779.00000000	-14740958.00000000	-9618093.00000000	-6490877.00000000	-7791424.00000000	-13983345.00000000	-8482333.00000000	-12819797.00000000	-22425732.00000000	-12784073.00000000	-18914722.00000000	-15125347.00000000	-16321679.00000000	-20130090.00000000	-18068258.00000000	-16522658.00000000
238.93634033	-6137747.50000000	-9565658.00000000	-8090751.00000000	-10762818.00000000	-7616667.50000000	-9555889.00000000	-9301111.00000000	-8004135.00000000	-6802411.00000000	-17791806.00000000	-7847058.00000000	-9935796.00000000	-16149156.00000000	-17714684.00000000	-2775756.25000000	-11440741.00000000	-10360222.00000000	-13117767.00000000	-7786347.50000000	-8683075.00000000	-15556061.00000000	-8146069.00000000	-17668254.00000000	-18646668.00000000	-6418446.00000000	-13434595.00000000	-15232274.00000000	-10629688.00000000	-6336276.00000000	-7524624.00000000	-9299803.00000000	-7062796.50000000	-8289963.00000000	-6989265.00000000	-14667844.00000000	-9557460.00000000	-6442140.50000000	-7493429.00000000	-14147834.00000000	-8217823.50000000	-12753446.00000000	-22271598.00000000	-12843592.00000000	-19167040.00000000	-15016894.00000000	-15758974.00000000	-20033074.00000000	-17801864.00000000	-16903788.00000000
238.90449524	-6057353.00000000	-9927624.00000000	-7975406.00000000	-10985834.00000000	-7665899.50000000	-9749290.00000000	-9288078.00000000	-8380582.00000000	-7097893.50000000	-18023214.00000000	-7783158.00000000	-9604077.00000000	-15746232.00000000	-17696888.00000000	-2536840.75000000	-11363287.00000000	-10165660.00000000	-12878370.00000000	-7983170.50000000	-8676542.00000000	-15361673.00000000	-7869501.00000000	-17641628.00000000	-18225038.00000000	-6403817.50000000	-13552455.00000000	-15148921.00000000	-11223422.00000000	-6487210.50000000	-7631045.00000000	-9491476.00000000	-6439028.00000000	-8122069.00000000	-6495800.50000000	-14586648.00000000	-9516543.00000000	-6474465.50000000	-7351229.50000000	-14313247.00000000	-7744910.00000000	-12736149.00000000	-22037430.00000000	-12838563.00000000	-19643502.00000000	-14813782.00000000	-15340338.00000000	-20007280.00000000	-17747702.00000000	-17293100.00000000
238.87265015	-6217930.50000000	-10437698.00000000	-8037178.50000000	-11211220.00000000	-7747859.50000000	-10061338.00000000	-9097195.00000000	-8898368.00000000	-7289121.00000000	-18210602.00000000	-7433904.50000000	-9267231.00000000	-15293366.00000000	-17689864.00000000	-2299374.25000000	-11285070.00000000	-10092480.00000000	-12408093.00000000	-8395801.00000000	-8724380.00000000	-15206658.00000000	-7821765.00000000	-17464854.00000000	-18009442.00000000	-6524289.50000000	-13576891.00000000	-15059026.00000000	-11746680.00000000	-6975174.50000000	-7851397.00000000	-9712832.00000000	-5816228.50000000	-7923356.50000000	-6193825.50000000	-14486045.00000000	-9473965.00000000	-6504250.00000000	-7442774.50000000	-14423165.00000000	-7120186.00000000	-12782524.00000000	-21692718.00000000	-12816823.00000000	-20248336.00000000	-14446228.00000000	-15065135.00000000	-20024208.00000000	-17928792.00000000	-17642874.00000000
238.84082031	-6529305.50000000	-10879371.00000000	-8207941.00000000	-11374855.00000000	-7764755.50000000	-10408980.00000000	-8716116.00000000	-9519780.00000000	-7341884.50000000	-18398236.00000000	-6804827.50000000	-8892722.00000000	-14790947.00000000	-17606460.00000000	-2117169.00000000	-11232913.00000000	-10091012.00000000	-11760496.00000000	-8981615.00000000	-8780639.00000000	-15017324.00000000	-8045247.00000000	-17167482.00000000	-17972528.00000000	-6693393.00000000	-13533853.00000000	-14919378.00000000	-12118688.00000000	-7716409.50000000	-8109833.50000000	-9922496.00000000	-5317311.50000000	-7707862.50000000	-6113015.50000000	-14308930.00000000	-9378264.00000000	-6469684.00000000	-7748039.50000000	-14468619.00000000	-6406371.50000000	-12879486.00000000	-21264932.00000000	-12820116.00000000	-20837314.00000000	-13873945.00000000	-14860940.00000000	-20044952.00000000	-18265868.00000000	-17878924.00000000
238.80897522	-6847567.00000000	-11065609.00000000	-8399302.00000000	-11427219.00000000	-7642163.50000000	-10686801.00000000	-8182318.50000000	-10200029.00000000	-7247153.00000000	-18625608.00000000	-5959697.00000000	-8491309.00000000	-14242793.00000000	-17371388.00000000	-2052099.00000000	-11269423.00000000	-10116935.00000000	-11046833.00000000	-9697793.00000000	-8829721.00000000	-14781925.00000000	-8518750.00000000	-16801104.00000000	-18049238.00000000	-6818155.00000000	-13450329.00000000	-14687536.00000000	-12295003.00000000	-8562569.00000000	-8322098.50000000	-10037819.00000000	-5024252.00000000	-7492295.00000000	-6226581.00000000	-13967057.00000000	-9161728.00000000	-6368132.00000000	-8147163.50000000	-14487207.00000000	-5655810.00000000	-12974845.00000000	-20838802.00000000	-12847591.00000000	-21315210.00000000	-13110368.00000000	-14634561.00000000	-20024716.00000000	-18642032.00000000	-17948722.00000000
238.77714539	-7037134.00000000	-10923203.00000000	-8554631.00000000	-11388905.00000000	-7370077.50000000	-10800568.00000000	-7582773.50000000	-10853957.00000000	-7036677.50000000	-18861696.00000000	-5006008.50000000	-8122848.00000000	-13697535.00000000	-16991782.00000000	-2113403.25000000	-11477414.00000000	-10161970.00000000	-10367574.00000000	-10500938.00000000	-8899789.00000000	-14549857.00000000	-9151920.00000000	-16411165.00000000	-18156642.00000000	-6838716.50000000	-13335132.00000000	-14356366.00000000	-12262391.00000000	-9378948.00000000	-8409390.00000000	-9984097.00000000	-4969753.00000000	-7310282.50000000	-6445110.00000000	-13390099.00000000	-8772301.00000000	-6240691.50000000	-8485057.00000000	-14516676.00000000	-4913057.00000000	-13002744.00000000	-20513954.00000000	-12874744.00000000	-21674202.00000000	-12208322.00000000	-14328870.00000000	-19931396.00000000	-18976900.00000000	-17848382.00000000
238.74528503	-7026139.00000000	-10497051.00000000	-8659043.00000000	-11351417.00000000	-7021737.50000000	-10705689.00000000	-7018316.50000000	-11361064.00000000	-6799253.50000000	-19016826.00000000	-4066538.00000000	-7848069.50000000	-13239638.00000000	-16559095.00000000	-2257795.25000000	-11896606.00000000	-10240210.00000000	-9760249.00000000	-11329757.00000000	-9028665.00000000	-14390033.00000000	-9807850.00000000	-16034133.00000000	-18210204.00000000	-6743935.50000000	-13156252.00000000	-13975232.00000000	-12034801.00000000	-10104045.00000000	-8319772.00000000	-9746453.00000000	-5150484.50000000	-7225357.50000000	-6656616.00000000	-12575968.00000000	-8216872.50000000	-6133001.00000000	-8650965.00000000	-14557916.00000000	-4218528.00000000	-12940576.00000000	-20358288.00000000	-12896014.00000000	-21954630.00000000	-11224434.00000000	-13942989.00000000	-19762128.00000000	-19255104.00000000	-17627980.00000000
238.71345520	-6816832.00000000	-9907067.00000000	-8715272.00000000	-11415497.00000000	-6718154.00000000	-10424828.00000000	-6561932.00000000	-11614578.00000000	-6657415.50000000	-19016548.00000000	-3253526.50000000	-7684569.00000000	-12929717.00000000	-16181981.00000000	-2447363.75000000	-12479720.00000000	-10342316.00000000	-9216474.00000000	-12089390.00000000	-9218375.00000000	-14350624.00000000	-10352592.00000000	-15717491.00000000	-18141450.00000000	-6567794.50000000	-12853472.00000000	-13639162.00000000	-11658602.00000000	-10753787.00000000	-8059663.50000000	-9387841.00000000	-5531662.00000000	-7302004.00000000	-6786562.00000000	-11604326.00000000	-7589716.50000000	-6072913.50000000	-8612086.00000000	-14586238.00000000	-3605650.75000000	-12840828.00000000	-20388646.00000000	-12930763.00000000	-22184862.00000000	-10202621.00000000	-13514084.00000000	-19537318.00000000	-19503274.00000000	-17386686.00000000
238.68161011	-6451863.00000000	-9300040.00000000	-8720590.00000000	-11625713.00000000	-6551629.00000000	-10034898.00000000	-6237364.50000000	-11565750.00000000	-6700470.50000000	-18853876.00000000	-2652446.75000000	-7611726.00000000	-12762762.00000000	-15911952.00000000	-2695402.00000000	-13122016.00000000	-10411902.00000000	-8745519.00000000	-12661010.00000000	-9423903.00000000	-14444712.00000000	-10707922.00000000	-15522119.00000000	-17917658.00000000	-6367497.50000000	-12392222.00000000	-13444401.00000000	-11209106.00000000	-11372786.00000000	-7706925.00000000	-9026877.00000000	-6046105.50000000	-7546533.00000000	-6830421.50000000	-10606540.00000000	-7057822.00000000	-6070773.00000000	-8392756.00000000	-14591652.00000000	-3100691.50000000	-12794415.00000000	-20577004.00000000	-12981259.00000000	-22359758.00000000	-9195996.00000000	-13090051.00000000	-19272446.00000000	-19749914.00000000	-17249024.00000000
238.64976501	-5978033.50000000	-8803479.00000000	-8662610.00000000	-11956076.00000000	-6527549.00000000	-9633836.00000000	-6023449.00000000	-11229739.00000000	-6929182.00000000	-18569234.00000000	-2308906.00000000	-7602685.50000000	-12695698.00000000	-15723859.00000000	-3046181.25000000	-13732216.00000000	-10374651.00000000	-8405541.00000000	-12942301.00000000	-9585641.00000000	-14652268.00000000	-10876127.00000000	-15483069.00000000	-17555514.00000000	-6189275.00000000	-11815184.00000000	-13440015.00000000	-10767195.00000000	-11971973.00000000	-7375710.00000000	-8791347.00000000	-6609583.50000000	-7876478.00000000	-6834643.00000000	-9718073.00000000	-6799560.50000000	-6122306.00000000	-8039149.00000000	-14595148.00000000	-2730000.00000000	-12854736.00000000	-20860952.00000000	-12999326.00000000	-22460932.00000000	-8299431.50000000	-12711302.00000000	-18955046.00000000	-19999534.00000000	-17308802.00000000
238.61793518	-5441888.00000000	-8483492.00000000	-8523295.00000000	-12343547.00000000	-6574277.50000000	-9304354.00000000	-5874333.00000000	-10671466.00000000	-7265449.50000000	-18193668.00000000	-2216174.25000000	-7633027.50000000	-12708794.00000000	-15557122.00000000	-3513899.50000000	-14265793.00000000	-10189486.00000000	-8257991.50000000	-12891268.00000000	-9675380.00000000	-14926519.00000000	-10924924.00000000	-15563531.00000000	-17116646.00000000	-6044065.00000000	-11243468.00000000	-13615287.00000000	-10394999.00000000	-12500702.00000000	-7147827.00000000	-8762762.00000000	-7150713.00000000	-8157663.00000000	-6850216.00000000	-9041361.00000000	-6923671.00000000	-6206600.00000000	-7604274.50000000	-14619269.00000000	-2523524.50000000	-12999601.00000000	-21151252.00000000	-12915478.00000000	-22480266.00000000	-7643474.50000000	-12399143.00000000	-18552422.00000000	-20230496.00000000	-17567604.00000000
238.58609009	-4906528.00000000	-8333718.50000000	-8279175.50000000	-12726856.00000000	-6610866.50000000	-9088018.00000000	-5742461.00000000	-9998020.00000000	-7611807.50000000	-17723672.00000000	-2314625.00000000	-7657142.00000000	-12819842.00000000	-15368926.00000000	-4050172.75000000	-14693021.00000000	-9866983.00000000	-8292762.00000000	-12535303.00000000	-9718949.00000000	-15213316.00000000	-10945588.00000000	-15659563.00000000	-16682440.00000000	-5915463.50000000	-10823827.00000000	-13927721.00000000	-10134439.00000000	-12876603.00000000	-7027309.00000000	-8927376.00000000	-7625469.00000000	-8282501.00000000	-6904636.50000000	-8625552.00000000	-7409331.00000000	-6291134.50000000	-7149934.50000000	-14647050.00000000	-2502224.00000000	-13165878.00000000	-21348398.00000000	-12710980.00000000	-22418904.00000000	-7333520.00000000	-12144377.00000000	-18045564.00000000	-20411242.00000000	-17925962.00000000
238.55426025	-4453305.50000000	-8314205.50000000	-7906212.00000000	-13062926.00000000	-6612747.50000000	-8979080.00000000	-5593613.50000000	-9343104.00000000	-7897837.50000000	-17147620.00000000	-2514562.75000000	-7596331.00000000	-13031063.00000000	-15152743.00000000	-4570347.00000000	-14957708.00000000	-9443992.00000000	-8412381.00000000	-11939687.00000000	-9784015.00000000	-15487795.00000000	-11008339.00000000	-15665340.00000000	-16320508.00000000	-5790763.50000000	-10660976.00000000	-14334150.00000000	-10020680.00000000	-13049323.00000000	-6959308.00000000	-9164247.00000000	-7999993.50000000	-8224596.00000000	-7013047.50000000	-8457604.00000000	-8102591.50000000	-6348280.00000000	-6742625.50000000	-14619846.00000000	-2658614.75000000	-13312672.00000000	-21376010.00000000	-12455553.00000000	-22269552.00000000	-7377206.00000000	-11905164.00000000	-17459506.00000000	-20525158.00000000	-18252992.00000000
238.52239990	-4156059.25000000	-8403168.00000000	-7401999.50000000	-13324377.00000000	-6624713.50000000	-8943426.00000000	-5409010.00000000	-8815827.00000000	-8082869.50000000	-16483403.00000000	-2734504.50000000	-7374748.00000000	-13279358.00000000	-14919914.00000000	-5002435.50000000	-14986535.00000000	-8954095.00000000	-8497890.00000000	-11172678.00000000	-9945455.00000000	-15777453.00000000	-11130875.00000000	-15543057.00000000	-16063458.00000000	-5679477.50000000	-10774829.00000000	-14792151.00000000	-10079105.00000000	-13041117.00000000	-6890101.00000000	-9300002.00000000	-8227527.00000000	-8031024.00000000	-7204717.50000000	-8466741.00000000	-8780794.00000000	-6367193.00000000	-6436250.50000000	-14481022.00000000	-2954749.50000000	-13446573.00000000	-21216548.00000000	-12259568.00000000	-22006094.00000000	-7666071.00000000	-11623356.00000000	-16862740.00000000	-20585554.00000000	-18480852.00000000
238.49057007	-4052309.50000000	-8598186.00000000	-6812659.00000000	-13492399.00000000	-6722002.00000000	-8953510.00000000	-5178053.00000000	-8437467.00000000	-8145055.00000000	-15784233.00000000	-2929396.00000000	-6980255.00000000	-13463206.00000000	-14678387.00000000	-5308790.00000000	-14739291.00000000	-8429029.00000000	-8484756.00000000	-10304538.00000000	-10246190.00000000	-16132771.00000000	-11269843.00000000	-15337199.00000000	-15913064.00000000	-5598648.50000000	-11098340.00000000	-15241984.00000000	-10298154.00000000	-12924655.00000000	-6804320.50000000	-9214072.00000000	-8258215.50000000	-7772483.00000000	-7526754.50000000	-8551346.00000000	-9258668.00000000	-6347481.00000000	-6255567.00000000	-14219745.00000000	-3346790.00000000	-13594668.00000000	-20921702.00000000	-12175480.00000000	-21593442.00000000	-8035727.50000000	-11252693.00000000	-16336074.00000000	-20622644.00000000	-18639826.00000000
238.45872498	-4137879.50000000	-8862349.00000000	-6230980.00000000	-13552756.00000000	-6957582.50000000	-9012836.00000000	-4891880.50000000	-8132801.50000000	-8089723.50000000	-15111872.00000000	-3091767.25000000	-6492142.50000000	-13527389.00000000	-14432296.00000000	-5475067.00000000	-14240622.00000000	-7916348.50000000	-8368770.00000000	-9430722.00000000	-10667653.00000000	-16555220.00000000	-11343659.00000000	-15131664.00000000	-15863075.00000000	-5545485.50000000	-11511890.00000000	-15607254.00000000	-10612270.00000000	-12757529.00000000	-6705990.50000000	-8920738.00000000	-8080863.50000000	-7503010.50000000	-8014276.00000000	-8626764.00000000	-9474834.00000000	-6285805.50000000	-6194490.50000000	-13869794.00000000	-3814043.50000000	-13768802.00000000	-20587394.00000000	-12135966.00000000	-21011800.00000000	-8360141.50000000	-10782062.00000000	-15934567.00000000	-20646318.00000000	-18806766.00000000
238.42689514	-4382398.50000000	-9089220.00000000	-5752490.50000000	-13497585.00000000	-7328605.00000000	-9147138.00000000	-4544420.00000000	-7799316.50000000	-7961763.00000000	-14507380.00000000	-3233691.50000000	-6047247.00000000	-13512370.00000000	-14190489.00000000	-5497127.00000000	-13566011.00000000	-7473318.00000000	-8149507.00000000	-8673385.00000000	-11123957.00000000	-16951294.00000000	-11283220.00000000	-14997977.00000000	-15917300.00000000	-5494054.00000000	-11900491.00000000	-15826485.00000000	-10929255.00000000	-12539993.00000000	-6575200.50000000	-8557154.00000000	-7751845.00000000	-7258966.00000000	-8652850.00000000	-8670837.00000000	-9501433.00000000	-6177198.50000000	-6228124.00000000	-13470773.00000000	-4360670.50000000	-13959619.00000000	-20309456.00000000	-11987292.00000000	-20281260.00000000	-8606790.00000000	-10246367.00000000	-15669012.00000000	-20620712.00000000	-19025462.00000000
238.39505005	-4744494.00000000	-9149552.00000000	-5422239.00000000	-13335350.00000000	-7770558.50000000	-9369766.00000000	-4140013.00000000	-7390989.50000000	-7828384.00000000	-13983501.00000000	-3370674.00000000	-5771457.50000000	-13511449.00000000	-13958910.00000000	-5386023.50000000	-12810637.00000000	-7127556.50000000	-7791026.50000000	-8137576.00000000	-11488755.00000000	-17167880.00000000	-11082234.00000000	-14970435.00000000	-16085521.00000000	-5420511.00000000	-12207262.00000000	-15887473.00000000	-11186595.00000000	-12240145.00000000	-6358420.00000000	-8284045.00000000	-7374161.50000000	-7080680.00000000	-9368204.00000000	-8735812.00000000	-9474033.00000000	-6031647.50000000	-6327685.50000000	-13040133.00000000	-4984061.00000000	-14153474.00000000	-20144208.00000000	-11593982.00000000	-19473090.00000000	-8815436.00000000	-9728292.00000000	-15515713.00000000	-20488668.00000000	-19275360.00000000
238.36320496	-5176970.50000000	-8986024.00000000	-5223002.50000000	-13101901.00000000	-8177031.00000000	-9656450.00000000	-3703013.00000000	-6935823.50000000	-7742307.00000000	-13542596.00000000	-3518098.25000000	-5726044.50000000	-13580286.00000000	-13719080.00000000	-5180393.50000000	-12074907.00000000	-6841441.00000000	-7250446.50000000	-7855099.50000000	-11646095.00000000	-17086222.00000000	-10808058.00000000	-15043086.00000000	-16363745.00000000	-5324332.00000000	-12449344.00000000	-15834015.00000000	-11381655.00000000	-11859425.00000000	-6009451.50000000	-8181639.50000000	-7042825.50000000	-7019891.00000000	-10054353.00000000	-8914060.00000000	-9500418.00000000	-5883464.00000000	-6471625.50000000	-12585840.00000000	-5638651.00000000	-14344974.00000000	-20086414.00000000	-10933561.00000000	-18698466.00000000	-9029603.00000000	-9350357.00000000	-15443361.00000000	-20235720.00000000	-19505118.00000000
238.33137512	-5628374.00000000	-8660437.00000000	-5117461.00000000	-12858038.00000000	-8444042.00000000	-9956368.00000000	-3283575.00000000	-6485950.50000000	-7729630.00000000	-13205757.00000000	-3693382.00000000	-5894058.50000000	-13689059.00000000	-13424409.00000000	-4948259.50000000	-11458883.00000000	-6519802.50000000	-6536085.50000000	-7771222.00000000	-11535402.00000000	-16693149.00000000	-10561107.00000000	-15170487.00000000	-16720855.00000000	-5219123.00000000	-12683786.00000000	-15746674.00000000	-11545162.00000000	-11468640.00000000	-5540290.00000000	-8217181.50000000	-6805127.00000000	-7117119.00000000	-10619215.00000000	-9275603.00000000	-9613677.00000000	-5777379.00000000	-6651239.50000000	-12136518.00000000	-6231120.00000000	-14535886.00000000	-20066878.00000000	-10110595.00000000	-18073754.00000000	-9244949.00000000	-9245577.00000000	-15435271.00000000	-19934996.00000000	-19681122.00000000
238.29951477	-6048072.00000000	-8309040.50000000	-5101288.50000000	-12669481.00000000	-8525617.00000000	-10228999.00000000	-2951015.75000000	-6071379.50000000	-7811716.50000000	-13025274.00000000	-3913845.75000000	-6201691.50000000	-13752844.00000000	-13036050.00000000	-4773613.00000000	-11040512.00000000	-6059627.50000000	-5725089.00000000	-7789982.50000000	-11163983.00000000	-16076587.00000000	-10416546.00000000	-15276993.00000000	-17104472.00000000	-5108457.50000000	-12952083.00000000	-15716671.00000000	-11688489.00000000	-11178528.00000000	-5030520.00000000	-8285507.50000000	-6661280.50000000	-7370712.00000000	-11013745.00000000	-9816177.00000000	-9782712.00000000	-5743684.00000000	-6870131.00000000	-11746602.00000000	-6656009.00000000	-14731442.00000000	-19974202.00000000	-9285520.00000000	-17676554.00000000	-9416975.00000000	-9504972.00000000	-15494320.00000000	-19722348.00000000	-19801274.00000000
238.26768494	-6395609.50000000	-8060224.50000000	-5212315.00000000	-12585104.00000000	-8464220.00000000	-10469328.00000000	-2767787.50000000	-5703889.50000000	-8012274.50000000	-13056789.00000000	-4189535.50000000	-6557345.00000000	-13693862.00000000	-12574759.00000000	-4731406.50000000	-10843880.00000000	-5404369.50000000	-4926011.00000000	-7837386.50000000	-10588749.00000000	-15368003.00000000	-10396254.00000000	-15290000.00000000	-17458742.00000000	-4982500.50000000	-13249935.00000000	-15819468.00000000	-11781847.00000000	-11077733.00000000	-4586086.00000000	-8269416.50000000	-6586928.00000000	-7730793.50000000	-11225984.00000000	-10448996.00000000	-9944391.00000000	-5786502.00000000	-7136024.00000000	-11469783.00000000	-6845952.50000000	-14938233.00000000	-19702114.00000000	-8577648.00000000	-17517946.00000000	-9515731.00000000	-10127352.00000000	-15633763.00000000	-19717454.00000000	-19871868.00000000
238.23585510	-6655311.00000000	-7991982.00000000	-5487380.50000000	-12629142.00000000	-8360738.50000000	-10698208.00000000	-2753934.50000000	-5401967.00000000	-8314130.50000000	-13300818.00000000	-4515608.00000000	-6890935.00000000	-13473662.00000000	-12137844.00000000	-4853800.50000000	-10830299.00000000	-4568207.50000000	-4234644.50000000	-7889873.50000000	-9892265.00000000	-14689082.00000000	-10483793.00000000	-15187008.00000000	-17739006.00000000	-4843115.00000000	-13538768.00000000	-16083222.00000000	-11782009.00000000	-11195797.00000000	-4283083.00000000	-8080113.00000000	-6550465.50000000	-8126720.50000000	-11253613.00000000	-11046991.00000000	-10027159.00000000	-5892332.00000000	-7448538.50000000	-11335159.00000000	-6798733.00000000	-15158500.00000000	-19202654.00000000	-8014032.00000000	-17549546.00000000	-9575664.00000000	-11010191.00000000	-15867634.00000000	-19958098.00000000	-19883510.00000000
238.20401001	-6853030.50000000	-8140889.00000000	-5911344.50000000	-12800923.00000000	-8294543.50000000	-10931245.00000000	-2871964.00000000	-5189395.00000000	-8610541.00000000	-13666485.00000000	-4866539.50000000	-7174544.50000000	-13085033.00000000	-11856521.00000000	-5100939.50000000	-10925413.00000000	-3624343.25000000	-3720946.25000000	-7954309.50000000	-9170455.00000000	-14127503.00000000	-10653367.00000000	-15020196.00000000	-17919486.00000000	-4724392.50000000	-13771103.00000000	-16463714.00000000	-11673986.00000000	-11509774.00000000	-4137716.00000000	-7679923.50000000	-6523796.50000000	-8504533.00000000	-11088732.00000000	-11510020.00000000	-9970333.00000000	-6042864.50000000	-7793076.00000000	-11351593.00000000	-6562898.00000000	-15385624.00000000	-18507034.00000000	-7551486.50000000	-17698880.00000000	-9693823.00000000	-11997284.00000000	-16208502.00000000	-20397052.00000000	-19813202.00000000
[truncated: 7,758 more rows]
[truncated: 32 more columns]
